# Supplementary material
Source: PubMed Central journal article supplement (PMC9463176)
Supplement: 42003_2022_3866_MOESM1_ESM.pdf [file 42003_2022_3866_MOESM1_ESM.pdf]

## Supplementary Information for

### **Arsenal of nanobodies shows broad-spectrum neutralization against SARS-CoV-2 variants of concern *in vitro* and *in vivo* in hamster models**

Martin A. Rossotti<sup>1</sup>, Henk van Faassen<sup>1</sup>, Anh T. Tran<sup>1</sup>, Joey Sheff<sup>1</sup>, Jagdeep K. Sandhu<sup>2,3</sup>, Diana Duque<sup>1</sup>, Melissa Hewitt<sup>2</sup>, Xiaoxue Wen<sup>1</sup>, Jegarubee Bavananthasivam<sup>1</sup>, Saina Beitari<sup>1</sup>, Kevin Matte<sup>3</sup>, Geneviève Laroche<sup>3</sup>, Patrick M. Giguère<sup>3,4</sup>, Christian Gervais<sup>5</sup>, Matthew Stuiblé<sup>5</sup>, Julie Guimond<sup>5</sup>, Sylvie Perret<sup>5</sup>, Greg Hussack<sup>1</sup>, Marc-André Langlois<sup>3</sup>, Yves Durocher<sup>5,6</sup> & Jamshid Tanha<sup>1,3\*</sup>

<sup>1</sup>Human Health Therapeutics Research Centre, Life Sciences Division, National Research Council Canada, 100 Sussex Drive, Ottawa, Ontario, Canada; <sup>2</sup>Human Health Therapeutics Research Centre, Life Sciences Division, National Research Council Canada, 1200 Montreal Road, Ottawa, Ontario, Canada; <sup>3</sup>Department of Biochemistry, Microbiology and Immunology, Faculty of Medicine, University of Ottawa, 451 Smyth Road, Ottawa, Ontario, Canada; <sup>4</sup>University of Ottawa Brain and Mind Research Institute, University of Ottawa, 451 Smyth Road, Ottawa, Ontario, Canada; <sup>5</sup>Human Health Therapeutics Research Centre, Life Sciences Division, National Research Council Canada, 6100 Royalmount Avenue, Montréal, Québec, Canada; <sup>6</sup>Département de biochimie et médecine moléculaire, Université de Montréal, Pavillon Roger-Gaudry, C.P. 6128, Succ. Centre-ville, Montréal, Québec, Canada

\*Correspondence to: Jamshid Tanha, Ph.D., Human Health Therapeutics Research Centre, Life Sciences Division, National Research Council Canada, 100 Sussex Drive, Ottawa, Ontario, Canada, K1A 0R6, Tel: 613-990-7206; Email:

[Jamshid.Tanha@nrc-cnrc.gc.ca](mailto:Jamshid.Tanha@nrc-cnrc.gc.ca)

**This PDF file includes: (i) Supplementary Tables 1-9 and (ii) Supplementary Figures 1-23.**

**Other Supplementary Information for the manuscript includes: Supplementary Data 1.**

**Supplementary Table 1. Coronavirus spike glycoprotein and ACE2 fragments used in this study.**

| Description                                | Accession number            | Source          | Tag                              | Reference describing expression & purification |
|--------------------------------------------|-----------------------------|-----------------|----------------------------------|------------------------------------------------|
| S1 (aa16-685) (Wuhan)                      | QHD43416.1 <sup>b</sup>     | in-house        | FLAG, 6xHis                      | Akache et al.,2021 <sup>1</sup>                |
| S1 (aa16-685) (Wuhan)                      | QHD43416.1 <sup>b</sup>     | ACROBiosystems  | AviTag, 6xHis                    | na                                             |
| S1 (aa16-685) (Wuhan)                      | QHD43416.1 <sup>b</sup>     | ACROBiosystems  | Human IgG1 Fc                    | na                                             |
| NTD (aa16-305) (Wuhan)                     | QHD43416.1 <sup>b</sup>     | in-house        | FLAG, 6xHis                      | Akache et al.,2021 <sup>1</sup>                |
| RBD/SD1 (aa319-591) (Wuhan)                | QHD43416.1 <sup>b</sup>     | in-house        | Human IgG1 Fc                    | Wrapp et al., 2020 <sup>2</sup>                |
| RBD/SD1 (aa319-591) (Wuhan)                | QHD43416.1 <sup>b</sup>     | in-house        | 6xHis                            | Wrapp et al., 2020 <sup>2</sup>                |
| RBD_short (aa331-521) (Wuhan)              | QHD43416.1 <sup>b</sup>     | in-house        | 6xHis                            | Akache et al.,2021 <sup>1</sup>                |
| RBD (aa319-541) (Wuhan)                    | QHD43416.1 <sup>b</sup>     | in-house        | FLAG-6xHis (N-term), E5 (C-term) | Akache et al.,2021 <sup>1</sup>                |
| RBD_α (aa319-541) (B.1.1.7)                | QHD43416.1 <sup>b</sup>     | in-house        | FLAG, 6xHis                      | Colwill et al., 2021 <sup>3</sup>              |
| RBD_β (aa319-541) (B.1.351)                | QHD43416.1 <sup>b</sup>     | in-house        | FLAG, 6xHis                      | Colwill et al., 2021 <sup>3</sup>              |
| RBD_Wuhan (aa319-541)                      | QHD43416.1 <sup>b</sup>     | ACROBiosystems  | AviTag, 6xHis                    | na                                             |
| RBD_SARS-CoV (aa306-527)                   | AAX16192.1 <sup>b</sup>     | In-house        | FLAG, 6xHis                      | Colwill et al., 2021 <sup>3</sup>              |
| S2 (aa686-1208) (Wuhan)                    | QHD43416.1 <sup>b</sup>     | in-house        | FLAG, 6xHis                      | Akache et al.,2021 <sup>1</sup>                |
| Swine deltaCoV S <sup>a</sup>              | AIH06857.1 <sup>b</sup>     | in-house        | FLAG-Dual Strep-6xHis            | Galipeau et al., 2021 <sup>4</sup>             |
| Avian_IBV S <sup>a</sup>                   | AAP92675.1 <sup>b</sup>     | in-house        | FLAG-Dual Strep-6xHis            | Galipeau et al., 2021 <sup>4</sup>             |
| Pangolin CoV S <sup>a</sup>                | QIA48632.1 <sup>b</sup>     | in-house        | FLAG-Dual Strep-6xHis            | Galipeau et al., 2021 <sup>4</sup>             |
| Hedgehog CoV HKU31 S <sup>a</sup>          | QGA70702.0 <sup>b</sup>     | in-house        | FLAG-Dual Strep-6xHis            | Galipeau et al., 2021 <sup>4</sup>             |
| Bat CoV HKU9 S <sup>a</sup>                | YP_001039971.1 <sup>c</sup> | in-house        | FLAG-Dual Strep-6xHis            | Galipeau et al., 2021 <sup>4</sup>             |
| Bat SARS like CoV-WIV1 S <sup>a</sup>      | AGZ48828.1 <sup>b</sup>     | in-house        | FLAG-Dual Strep-6xHis            | Galipeau et al., 2021 <sup>4</sup>             |
| Bat 229E-related CoV S <sup>a</sup>        | APD51507.1 <sup>b</sup>     | in-house        | FLAG-Dual Strep-6xHis            | Galipeau et al., 2021 <sup>4</sup>             |
| Bat CoV 512 S <sup>a</sup>                 | YP_001351684.1 <sup>c</sup> | in-house        | FLAG-Dual Strep-6xHis            | Galipeau et al., 2021 <sup>4</sup>             |
| Bat SARS like CoV <sup>a</sup>             | ATO98157.1 <sup>b</sup>     | in-house        | FLAG-Dual Strep-6xHis            | Galipeau et al., 2021 <sup>4</sup>             |
| Civet SARS-CoV <sup>1</sup> S <sup>a</sup> | AAU04646.1 <sup>b</sup>     | in-house        | FLAG-Dual Strep-6xHis            | Galipeau et al., 2021 <sup>4</sup>             |
| Human MERS-CoV S <sup>a</sup>              | AGH58717.1 <sup>b</sup>     | in-house        | FLAG-Dual Strep-6xHis            | Galipeau et al., 2021 <sup>4</sup>             |
| Human CoV-NL63 S                           | APF29071.1 <sup>b</sup>     | Sino Biological | 6xHis                            | na                                             |
| Human CoV-OC43 S <sup>a</sup>              | AGT51431.1 <sup>b</sup>     | in-house        | FLAG-Dual Strep-6xHis            | Galipeau et al., 2021 <sup>4</sup>             |
| Human CoV-HKU1 S                           | Q0ZME7.1 <sup>d</sup>       | Sino Biological | 6xHis                            | na                                             |

|                                               |                         |                 |                       |                                    |
|-----------------------------------------------|-------------------------|-----------------|-----------------------|------------------------------------|
| Human CoV-229E S <sup>a</sup>                 | AAK32191.1 <sup>b</sup> | Sino Biological | 6xHis                 | na                                 |
| Human SARS-CoV S <sup>a</sup>                 | AAP13442.1 <sup>b</sup> | in-house        | FLAG-Dual Strep-6xHis | Galipeau et al., 2021 <sup>4</sup> |
| Human SARS-CoV-2_Wuhan S <sup>a</sup> (SmT1)  | QHD43416.1 <sup>b</sup> | in-house        | FLAG, 6xHis           | Colwill et al., 2021 <sup>3</sup>  |
| Human SARS-CoV-2_α (B.1.351) S <sup>a</sup>   | -                       | in-house        | FLAG, 6xHis           | Galipeau et al., 2021 <sup>4</sup> |
| Human SARS-CoV-2_β (B. 1.1.7) S <sup>a</sup>  | -                       | in-house        | FLAG, 6xHis           | Galipeau et al., 2021 <sup>4</sup> |
| Human SARS-CoV-2_γ (P.1) S <sup>a</sup>       | -                       | in-house        | none                  | Galipeau et al., 2021 <sup>4</sup> |
| Human SARS-CoV-2_Δ (B.1.617.2) S <sup>a</sup> | -                       | in-house        | FLAG, 6xHis           | Stuible et al., 2021 <sup>5</sup>  |
| Human SARS-CoV-2_κ (B.1.617.1) S <sup>a</sup> | -                       | in-house        | FLAG, 6xHis           | Stuible et al., 2021 <sup>5</sup>  |
| Human SARS-CoV-2_Ο (B.1.1.529) S <sup>a</sup> | -                       | in-house        | FLAG, 6xHis           | Sulea et al., 2022 <sup>6</sup>    |
| Human ACE2 (aa18-740)                         | Q9BYF1-1 <sup>d</sup>   | ACROBiosystems  | Human IgG1 Fc         | na                                 |
| Human ACE2 (aa18-615)                         | Q9BYF1-1 <sup>d</sup>   | in-house        | 6xHis                 | Wrapp et al., 2020 <sup>2</sup>    |

<sup>a</sup>Proteins are C-terminally fused to the resistin trimerization domain. <sup>b</sup>GenBank; <sup>c</sup>NCBI; <sup>d</sup>UniProt. na, not applicable

**Supplementary Table 2. Kinetic and equilibrium constants for V<sub>H</sub>Hs binding to SARS-CoV-2 Wuhan spike glycoprotein fragments.**

| V <sub>H</sub> H/ACE2              | RBD_short <sup>a</sup> |                      |                    | RBD/SD1 <sup>a</sup>  |                      |                    | S <sup>a</sup>        |                      |                    | S1 <sup>a</sup>       |                      |                    | S2 <sup>a</sup>       |                      |                    |   |   |   |
|------------------------------------|------------------------|----------------------|--------------------|-----------------------|----------------------|--------------------|-----------------------|----------------------|--------------------|-----------------------|----------------------|--------------------|-----------------------|----------------------|--------------------|---|---|---|
|                                    | k <sub>a</sub> (1/Ms)  | k <sub>d</sub> (1/s) | K <sub>D</sub> (M) | k <sub>a</sub> (1/Ms) | k <sub>d</sub> (1/s) | K <sub>D</sub> (M) | k <sub>a</sub> (1/Ms) | k <sub>d</sub> (1/s) | K <sub>D</sub> (M) | k <sub>a</sub> (1/Ms) | k <sub>d</sub> (1/s) | K <sub>D</sub> (M) | k <sub>a</sub> (1/Ms) | k <sub>d</sub> (1/s) | K <sub>D</sub> (M) |   |   |   |
| <b>RBD-specific V<sub>H</sub>H</b> |                        |                      |                    |                       |                      |                    |                       |                      |                    |                       |                      |                    |                       |                      |                    |   |   |   |
| 1d                                 | 9.26E+05               | 3.76E-03             | 4.06E-09           | 5.62E+05              | 1.18E-03             | 2.10E-09           | 1.06E+06              | 1.17E-03             | 1.10E-09           | 8.67E+05              | 1.14E-03             | 1.32E-09           | -                     | -                    | -                  |   |   |   |
| 02                                 | 2.01E+06               | 1.73E-03             | 8.60E-10           | 1.83E+06              | 1.41E-03             | 7.73E-10           | 2.14E+06              | 1.41E-03             | 6.61E-10           | 2.10E+06              | 1.38E-03             | 6.59E-10           | -                     | -                    | -                  |   |   |   |
| 03                                 | -                      | -                    | -                  | 1.66E+05              | 2.55E-04             | 1.53E-09           | 2.50E+05              | 3.34E-04             | 1.34E-09           | 2.41E+05              | 2.63E-04             | 1.09E-09           | -                     | -                    | -                  |   |   |   |
| 04                                 | 1.40E+06               | 2.02E-02             | 1.45E-08           | 1.53E+06              | 1.92E-02             | 1.25E-08           | 1.97E+06              | 1.98E-02             | 1.00E-08           | 1.61E+06              | 1.80E-02             | 1.12E-08           | -                     | -                    | -                  |   |   |   |
| 05                                 | 2.97E+06               | 7.13E-03             | 2.40E-09           | 2.51E+06              | 5.85E-03             | 2.33E-09           | 4.33E+06              | 7.43E-03             | 1.72E-09           | 4.03E+06              | 8.06E-03             | 2.00E-09           | -                     | -                    | -                  |   |   |   |
| 06                                 | 9.83E+03               | 6.87E-03             | 6.99E-07           | 5.94E+04              | 4.15E-03             | 6.99E-08           | 3.02E+04              | 4.69E-03             | 1.55E-07           | 1.04E+05              | 1.33E-02             | 1.29E-07           | -                     | -                    | -                  |   |   |   |
| 07                                 | 4.25E+05               | 4.54E-04             | 1.07E-09           | 3.18E+05              | 2.84E-04             | 8.94E-10           | 3.50E+05              | 4.03E-04             | 1.15E-09           | 3.01E+05              | 3.08E-04             | 1.02E-09           | -                     | -                    | -                  |   |   |   |
| 10                                 | 3.79E+05               | 1.01E-04             | 2.66E-10           | 3.51E+05              | 9.32E-05             | 2.66E-10           | 4.83E+05              | 9.27E-05             | 1.92E-10           | 4.48E+05              | 9.54E-05             | 2.13E-10           | -                     | -                    | -                  |   |   |   |
| 11                                 | -                      | -                    | -                  | 8.92E+05              | 2.26E-04             | 2.53E-10           | 1.21E+06              | 4.73E-05             | 3.91E-11           | 1.08E+06              | 1.80E-04             | 1.67E-10           | -                     | -                    | -                  |   |   |   |
| 12                                 | 5.33E+05               | 4.78E-05             | 8.97E-11           | 7.60E+05              | 3.69E-05             | 4.86E-11           | nd                    |                      |                    |                       |                      |                    |                       |                      |                    | - | - | - |
| 14                                 | 2.98E+05               | 1.11E-03             | 3.71E-09           | 2.61E+05              | 9.44E-04             | 3.61E-09           | 5.28E+05              | 1.64E-03             | 3.10E-09           | 3.19E+05              | 1.12E-03             | 3.49E-09           | -                     | -                    | -                  |   |   |   |
| 15                                 | 9.01E+05               | 2.89E-04             | 3.21E-10           | 6.82E+05              | 2.33E-04             | 3.42E-10           | 7.06E+05              | 2.21E-04             | 3.13E-10           | 6.75E+05              | 2.25E-04             | 3.33E-10           | -                     | -                    | -                  |   |   |   |
| 17                                 | 9.53E+05               | 3.48E-04             | 3.65E-10           | 5.67E+05              | 2.24E-04             | 3.95E-10           | 6.59E+05              | 9.79E-05             | 1.49E-10           | 6.29E+05              | 9.66E-05             | 1.53E-10           | -                     | -                    | -                  |   |   |   |
| 18                                 | 3.35E+05               | 1.80E-03             | 5.37E-09           | 2.68E+05              | 1.97E-04             | 7.36E-10           | 3.95E+05              | 1.52E-04             | 3.84E-10           | 3.08E+05              | 1.65E-04             | 5.36E-10           | -                     | -                    | -                  |   |   |   |
| 20                                 | 2.67E+06               | 2.10E-02             | 7.84E-09           | 1.43E+06              | 1.23E-02             | 8.61E-09           | 2.37E+06              | 1.59E-02             | 6.73E-09           | 1.96E+06              | 1.89E-02             | 9.63E-09           | -                     | -                    | -                  |   |   |   |
| MRed04                             | 1.58E+06               | 1.08E-02             | 6.86E-09           | 6.04E+05              | 1.51E-03             | 2.51E-09           | 1.39E+06              | 1.50E-03             | 1.09E-09           | 1.09E+06              | 1.83E-03             | 1.68E-09           | -                     | -                    | -                  |   |   |   |
| MRed05                             | 4.68E+05               | 6.33E-04             | 1.36E-09           | 6.50E+05              | 4.96E-04             | 7.63E-10           | nd                    |                      |                    |                       |                      |                    |                       |                      |                    | - | - | - |
| <b>NTD-specific V<sub>H</sub>H</b> |                        |                      |                    |                       |                      |                    |                       |                      |                    |                       |                      |                    |                       |                      |                    |   |   |   |
| SR01                               | -                      | -                    | -                  | -                     | -                    | -                  | 2.77E+06              | 1.23E-03             | 4.45E-10           | 3.63E+06              | 1.58E-03             | 4.37E-10           | -                     | -                    | -                  |   |   |   |
| SR02                               | -                      | -                    | -                  | -                     | -                    | -                  | 9.67E+05              | 5.71E-04             | 5.90E-10           | 1.05E+06              | 5.55E-04             | 5.30E-10           | -                     | -                    | -                  |   |   |   |
| SR03                               | -                      | -                    | -                  | -                     | -                    | -                  | 1.01E+06              | 1.02E-03             | 1.01E-09           | 9.05E+05              | 1.03E-03             | 1.13E-09           | -                     | -                    | -                  |   |   |   |
| SR04                               | -                      | -                    | -                  | -                     | -                    | -                  | 2.39E+06              | 3.35E-04             | 1.40E-10           | 2.18E+06              | 4.93E-04             | 2.26E-10           | -                     | -                    | -                  |   |   |   |
| SR13                               | -                      | -                    | -                  | -                     | -                    | -                  | 1.83E+06              | 4.81E-03             | 2.62E-09           | 2.25E+06              | 5.45E-03             | 2.43E-09           | -                     | -                    | -                  |   |   |   |
| SR16                               | -                      | -                    | -                  | -                     | -                    | -                  | 6.57E+05              | 1.20E-03             | 1.82E-09           | 7.39E+05              | 1.15E-03             | 1.55E-09           | -                     | -                    | -                  |   |   |   |

|                                   |          |          |          |          |          |          |          |          |          |          |          |          |          |          |          |
|-----------------------------------|----------|----------|----------|----------|----------|----------|----------|----------|----------|----------|----------|----------|----------|----------|----------|
| MRed03                            | -        | -        | -        | -        | -        | -        | 1.57E+05 | 8.14E-05 | 5.20E-10 | 2.76E+05 | 6.15E-05 | 2.23E-10 | -        | -        | -        |
| MRed06                            | -        | -        | -        | -        | -        | -        | 1.85E+05 | 8.87E-04 | 4.80E-09 | 3.71E+05 | 1.57E-03 | 4.22E-09 | -        | -        | -        |
| MRed07                            | -        | -        | -        | -        | -        | -        | 1.60E+06 | 3.78E-04 | 2.36E-10 | 1.13E+06 | 4.27E-04 | 3.78E-10 | -        | -        | -        |
| <b>S2-specific V<sub>HH</sub></b> |          |          |          |          |          |          |          |          |          |          |          |          |          |          |          |
| S2A3                              | -        | -        | -        | -        | -        | -        | 8.40E+04 | 1.30E-04 | 1.55E-09 | -        | -        | -        | 4.60E+04 | 1.03E-04 | 2.23E-09 |
| S2A4                              | -        | -        | -        | -        | -        | -        | 3.49E+04 | 4.46E-04 | 1.28E-08 | -        | -        | -        | 2.81E+04 | 4.14E-04 | 1.47E-08 |
| S2F3                              | -        | -        | -        | -        | -        | -        | 1.56E+05 | 4.73E-04 | 3.03E-09 | -        | -        | -        | 1.01E+05 | 6.29E-04 | 6.22E-09 |
| S2G3                              | -        | -        | -        | -        | -        | -        | 1.62E+05 | 6.07E-04 | 3.74E-09 | -        | -        | -        | 1.47E+05 | 6.27E-04 | 4.28E-09 |
| S2G4                              | -        | -        | -        | -        | -        | -        | 8.93E+05 | 2.07E-04 | 2.32E-10 | -        | -        | -        | 9.25E+05 | 3.82E-04 | 4.13E-10 |
| MRed11                            | -        | -        | -        | -        | -        | -        | 2.34E+04 | 4.18E-04 | 1.78E-8  | -        | -        | -        | 4.09E+04 | 2.13E-04 | 5.21E-09 |
| MRed18                            | -        | -        | -        | -        | -        | -        | 2.02E+05 | 1.53E-03 | 7.56E-09 | -        | -        | -        | 1.52E+05 | 1.03E-03 | 6.80E-09 |
| MRed19                            | -        | -        | -        | -        | -        | -        | 1.59E+05 | 7.99E-04 | 5.01E-09 | -        | -        | -        | 1.02E+05 | 8.40E-04 | 8.20E-09 |
| MRed20                            | -        | -        | -        | -        | -        | -        | 1.60E+05 | 1.46E-05 | 9.18E-11 | -        | -        | -        | 1.13E+05 | 3.38E-05 | 2.99E-10 |
| MRed22                            | -        | -        | -        | -        | -        | -        | 3.47E+05 | 1.76E-04 | 5.06E-10 | -        | -        | -        | 2.70E+05 | 2.84E-04 | 1.05E-09 |
| MRed25                            | -        | -        | -        | -        | -        | -        | 1.12E+05 | 1.15E-04 | 1.02E-09 | -        | -        | -        | 1.22E+05 | 1.90E-04 | 1.56E-09 |
| <b>Reference</b>                  |          |          |          |          |          |          |          |          |          |          |          |          |          |          |          |
| VHH-72 <sup>b</sup>               | 8.64E+05 | 4.22E-01 | 4.89E-07 | 6.67E+05 | 1.34E-01 | 2.00E-07 | 1.10E+06 | 1.56E-01 | 1.42E-07 | 9.40E+05 | 1.46E-01 | 1.56E-07 | -        | -        | -        |
| ACE-2 <sup>b</sup>                | 5.92E+04 | 1.35E-02 | 2.28E-07 | 3.71E+04 | 1.18E-02 | 3.17E-07 | 6.02E+04 | 9.96E-03 | 1.65E-07 | 6.21E+04 | 1.24E-02 | 2.00E-07 | -        | -        | -        |
| NRCsdAb022 <sup>b</sup>           | -        | -        | -        | -        | -        | -        | -        | -        | -        | -        | -        | -        | -        | -        | -        |

<sup>a</sup>For any given V<sub>HH</sub>, K<sub>D</sub> values across different spike fragments were essentially consistent, except for V<sub>HH</sub> 03/11 and 06/18 which respectively showed no or ~10-fold lower binding to RBD\_short compared to RBD/SD1 and S1. Lack of V<sub>HH</sub> binding for certain spike fragments are consistent with V<sub>HH</sub>s' subunit/domain specificities. Binding parameters were determined by flowing monomeric V<sub>HH</sub>s over sensorchip surfaces immobilized with various spike fragments, except for V<sub>HH</sub> 12 and MRed05, which were obtained by flowing monomeric RBDs over V<sub>HH</sub>-Fc-captured surfaces (for V<sub>HH</sub> 12, RBD [aa319-541] instead of RBD/SD1 was used). Dashes indicate lack of binding. See Supplementary Table 1 for the primary structures of spike glycoprotein fragments. <sup>b</sup>ACE2-H<sub>6</sub> and VHH-72<sup>7</sup>, positive controls, EGFR-specific V<sub>HH</sub> NRCsdAb022<sup>8</sup>, negative control.

**Supplementary Table 3. ELISA data for the binding of V<sub>H</sub>H-Fcs to SARS-CoV-2 Wuhan spike glycoprotein fragments.**

| V <sub>H</sub> H-Fc <sup>a</sup> | <i>EC</i> <sub>50app</sub> <sup>b</sup> (nM) |     |     |     | Domain specificity |
|----------------------------------|----------------------------------------------|-----|-----|-----|--------------------|
|                                  | S                                            | S1  | NTD | RBD |                    |
| SR01                             | 0.1                                          | 0.2 | 0.2 | -   | NTD                |
| SR02                             | 0.1                                          | 0.1 | 0.3 | -   | NTD                |
| SR03                             | 0.2                                          | 0.2 | 0.2 | -   | NTD                |
| SR04                             | 0.2                                          | 0.3 | 0.2 | -   | NTD                |
| SR13                             | 0.4                                          | 0.4 | 0.2 | -   | NTD                |
| SR16                             | 0.6                                          | 2.7 | 0.4 | -   | NTD                |
| MRed03                           | 0.2                                          | 0.5 | 0.7 | -   | NTD                |
| MRed06                           | 0.4                                          | 0.6 | 0.4 | -   | NTD                |
| MRed07                           | 1.2                                          | 1.5 | 0.8 | -   | NTD                |
| 02                               | 0.1                                          | 0.1 | -   | 0.2 | RBD                |

<sup>a</sup>S1-specific V<sub>H</sub>Hs that did not bind to RBD by SPR (Supplementary Table 2) were tested for specificity against recombinant NTD domain (Supplementary Table 1). The RBD-specific V<sub>H</sub>H 02 internal control gave the expected binding specificity profile; <sup>b</sup>*EC*<sub>50app</sub>, apparent *EC*<sub>50</sub>. Dashes indicate lack of binding.

**Supplementary Table 4. Kinetic and equilibrium dissociation constants for the binding of V<sub>H</sub>Hs to SARS-CoV-2 Wuhan, SARS-CoV-2 Alpha, SARS-CoV-2 Beta and SARS-CoV spike glycoprotein fragments.**

| V <sub>H</sub> H/ACE2              | SARS-CoV-2 Wuhan <sup>a</sup> |                      |                    | SARS-CoV-2 Alpha <sup>a</sup> |                      |                    | SARS-CoV-2 Beta <sup>a</sup> |                      |                    | SARS-CoV <sup>a</sup> |                      |                    |
|------------------------------------|-------------------------------|----------------------|--------------------|-------------------------------|----------------------|--------------------|------------------------------|----------------------|--------------------|-----------------------|----------------------|--------------------|
|                                    | k <sub>a</sub> (1/Ms)         | k <sub>d</sub> (1/s) | K <sub>D</sub> (M) | k <sub>a</sub> (1/Ms)         | k <sub>d</sub> (1/s) | K <sub>D</sub> (M) | k <sub>a</sub> (1/Ms)        | k <sub>d</sub> (1/s) | K <sub>D</sub> (M) | k <sub>a</sub> (1/Ms) | k <sub>d</sub> (1/s) | K <sub>D</sub> (M) |
| <b>RBD-specific V<sub>H</sub>H</b> |                               |                      |                    |                               |                      |                    |                              |                      |                    |                       |                      |                    |
| 1d                                 | 1.39E+06                      | 1.05E-03             | 7.50E-10           | 1.13E+06                      | 1.02E-03             | 9.07E-10           | 8.12E+05                     | 9.56E-04             | 1.18E-09           | -                     | -                    | -                  |
| 02                                 | 2.04E+06                      | 1.27E-03             | 6.24E-10           | 1.64E+06                      | 2.22E-02             | 1.36E-08           | -                            | -                    | -                  | -                     | -                    | -                  |
| 03                                 | 1.16E+05                      | 1.81E-04             | 1.56E-09           | 1.03E+05                      | 1.54E-04             | 1.49E-09           | 5.54E+04                     | 2.26E-04             | 4.08E-09           | -                     | -                    | -                  |
| 04                                 | 1.84E+06                      | 1.88E-02             | 1.02E-08           | 1.67E+06                      | 1.96E-02             | 1.17E-08           | -                            | -                    | -                  | -                     | -                    | -                  |
| 05                                 | 2.76E+06                      | 7.09E-03             | 2.57E-09           | 2.28E+06                      | 2.61E-02             | 1.14E-08           | -                            | -                    | -                  | -                     | -                    | -                  |
| 06                                 | 2.05E+04                      | 4.56E-03             | 2.23E-07           | 2.05E+04                      | 4.68E-03             | 2.29E-07           | 2.48E+04                     | 6.14E-03             | 2.48E-07           | -                     | -                    | -                  |
| 07                                 | 3.78E+05                      | 3.55E-04             | 9.39E-10           | 3.39E+05                      | 3.78E-04             | 1.12E-09           | 3.05E+05                     | 3.21E-04             | 1.05E-09           | 1.20E+05              | 1.46E-03             | 1.22E-08           |
| 10                                 | 5.81E+05                      | 1.16E-04             | 1.99E-10           | 4.84E+05                      | 1.02E-04             | 2.10E-10           | 2.70E+05                     | 2.62E-03             | 9.73E-09           | -                     | -                    | -                  |
| 11                                 | 9.64E+05                      | 1.71E-05             | 1.77E-11           | 9.28E+05                      | 1.59E-05             | 1.71E-11           | 7.57E+05                     | 1.72E-05             | 2.27E-11           | 1.93E+06              | 2.70E-05             | 1.40E-11           |
| 12 <sup>a</sup>                    | 7.47E+05                      | 3.50E-05             | 4.69E-11           | 9.47E+05                      | 4.38E-05             | 4.63E-11           | 9.70E+05                     | 3.89E-05             | 4.01E-11           | 3.76E+05              | 1.01E-03             | 2.69E-09           |
| 14                                 | 3.89E+05                      | 1.01E-03             | 2.60E-09           | 3.75E+05                      | 9.17E-04             | 2.44E-09           | -                            | -                    | -                  | -                     | -                    | -                  |
| 15                                 | 6.91E+05                      | 2.22E-04             | 3.21E-10           | 6.37E+05                      | 1.94E-04             | 3.05E-10           | 1.48E+05                     | 3.28E-03             | 2.22E-08           | -                     | -                    | -                  |
| 17                                 | 6.14E+05                      | 9.45E-05             | 1.54E-10           | 6.14E+05                      | 7.64E-05             | 1.25E-10           | 1.14E+06                     | 5.88E-03             | 5.14E-09           | -                     | -                    | -                  |
| 18                                 | 2.95E+05                      | 9.39E-05             | 3.18E-10           | 2.78E+05                      | 9.79E-05             | 3.53E-10           | 2.76E+05                     | 1.01E-04             | 3.65E-10           | -                     | -                    | -                  |
| 20                                 | 2.64E+06                      | 1.16E-02             | 4.39E-09           | 2.48E+06                      | 1.23E-02             | 4.97E-09           | 2.08E+06                     | 1.14E-02             | 5.47E-09           | -                     | -                    | -                  |
| MRed04                             | 1.51E+06                      | 1.31E-03             | 8.63E-10           | 1.34E+06                      | 1.22E-03             | 9.09E-10           | 1.14E+06                     | 1.23E-03             | 1.07E-09           | 3.23E+05              | 9.70E-02             | 3.00E-07           |
| MRed05 <sup>a</sup>                | 5.62E+05                      | 5.09E-04             | 9.05E-10           | 5.73E+05                      | 1.76E-04             | 3.07E-10           | 6.12E+05                     | 5.44E-04             | 8.88E-10           | -                     | -                    | -                  |
| <b>NTD-specific V<sub>H</sub>H</b> |                               |                      |                    |                               |                      |                    |                              |                      |                    |                       |                      |                    |
| SR01                               | 1.43E+06                      | 8.05E-04             | 5.64E-10           | 1.01E+06                      | 5.94E-04             | 5.91E-10           | 1.09E+06                     | 2.21E-04             | 2.02E-10           | 6.81E+05              | 1.05E-04             | 1.54E-10           |
| SR02                               | 4.98E+06                      | 6.69E-04             | 1.35E-10           | 4.54E+06                      | 2.54E-04             | 5.59E-11           | 4.19E+06                     | 6.28E-04             | 1.50E-10           | -                     | -                    | -                  |
| SR03                               | 6.70E+05                      | 1.13E-03             | 1.69E-09           | 5.55E+05                      | 9.55E-04             | 1.72E-09           | 5.64E+05                     | 1.40E-03             | 2.49E-09           | -                     | -                    | -                  |
| SR04                               | 3.68E+06                      | 5.15E-04             | 1.40E-10           | 2.80E+06                      | 7.50E-04             | 2.67E-10           | 2.24E+06                     | 7.23E-04             | 3.24E-10           | -                     | -                    | -                  |
| SR13                               | 1.06E+06                      | 3.76E-03             | 3.56E-09           | 5.92E+05                      | 3.44E-03             | 5.82E-09           | 5.71E+05                     | 4.01E-03             | 7.02E-09           | -                     | -                    | -                  |
| SR16                               | 4.88E+05                      | 9.57E-04             | 1.96E-09           | 4.04E+05                      | 6.33E-04             | 1.57E-09           | 3.95E+05                     | 1.01E-03             | 2.57E-09           | -                     | -                    | -                  |
| MRed03                             | 2.37E+05                      | 1.21E-04             | 5.08E-10           | 2.71E+05                      | 9.89E-05             | 3.64E-10           | 2.13E+05                     | 1.43E-04             | 6.72E-10           | -                     | -                    | -                  |

|                                   |          |          |          |          |          |          |          |          |          |          |          |          |
|-----------------------------------|----------|----------|----------|----------|----------|----------|----------|----------|----------|----------|----------|----------|
| MRed06                            | 1.92E+05 | 9.96E-04 | 5.19E-09 | 2.27E+05 | 1.30E-03 | 5.72E-09 | 1.39E+05 | 1.01E-03 | 7.24E-09 | -        | -        | -        |
| MRed07                            | 4.58E+06 | 4.81E-04 | 1.05E-10 | 3.90E+06 | 1.03E-03 | 2.64E-10 | 2.38E+06 | 5.52E-04 | 2.31E-10 | -        | -        | -        |
| <b>S2-specific V<sub>H</sub>H</b> |          |          |          |          |          |          |          |          |          |          |          |          |
| S2A3                              | 9.83E+04 | 5.51E-05 | 5.61E-10 | 8.70E+04 | 1.89E-04 | 2.18E-09 | 6.69E+04 | 5.71E-05 | 8.53E-10 | -        | -        | -        |
| S2A4                              | 3.49E+04 | 4.46E-04 | 1.28E-08 | 2.48E+05 | 2.36E-03 | 9.52E-09 | 5.88E+4  | 8.98E-4  | 1.53E-8  | -        | -        | -        |
| S2F3                              | 1.56E+05 | 4.73E-04 | 3.03E-09 |          | +        |          |          | +        |          | 2.82E+05 | 1.39E-03 | 4.91E-09 |
| S2G3                              | 3.24E+05 | 6.06E-04 | 1.87E-09 | 2.98E+05 | 5.30E-04 | 1.78E-09 | 3.04E+05 | 5.63E-04 | 1.85E-09 | 1.87E+05 | 8.00E-04 | 4.27E-09 |
| S2G4                              | 8.93E+05 | 2.07E-04 | 2.32E-10 | 1.56E+06 | 2.92E-04 | 1.87E-10 |          | +        |          | 9.20E+05 | 7.35E-04 | 7.99E-10 |
| MRed11                            | 4.57E+04 | 2.83E-04 | 6.20E-09 | 3.11E+04 | 4.26E-04 | 1.37E-08 | 4.54E+04 | 2.82E-04 | 6.21E-09 | -        | -        | -        |
| MRed18                            | 1.97E+05 | 1.19E-03 | 6.03E-09 | 3.82E+05 | 4.93E-03 | 1.29E-08 | 3.69E+05 | 2.39E-03 | 6.48E-09 | 3.00E+05 | 6.77E-03 | 2.25E-08 |
| MRed19                            | 1.31E+05 | 1.18E-03 | 9.07E-09 | 1.83E+05 | 3.70E-03 | 2.02E-08 | 1.29E+05 | 1.04E-03 | 8.07E-09 | 2.49E+05 | 6.14E-03 | 2.46E-08 |
| MRed20                            | 1.60E+05 | 1.46E-05 | 9.18E-11 | 2.78E+05 | 1.53E-04 | 5.50E-10 | 1.39E+05 | 6.33E-05 | 4.55E-10 | 3.80E+05 | 4.06E-03 | 1.07E-08 |
| MRed22                            | 3.47E+05 | 1.76E-04 | 5.06E-10 | 8.96E+05 | 2.20E-04 | 2.46E-10 |          | +        |          | -        | -        | -        |
| MRed25                            | 1.12E+05 | 1.15E-04 | 1.02E-09 | 1.02E+06 | 2.89E-04 | 2.83E-10 | 2.05E+06 | 3.29E-03 | 1.60E-09 | 2.18E+04 | 5.01E-05 | 2.29E-09 |
| <b>Control</b>                    |          |          |          |          |          |          |          |          |          |          |          |          |
| ACE2-H <sub>6</sub> <sup>b</sup>  | 6.38E+04 | 9.79E-03 | 1.53E-07 | 8.52E+04 | 1.56E-03 | 1.83E-08 | 3.66E+04 | 4.78E-03 | 1.31E-07 | 1.11E+05 | 3.89E-02 | 3.51E-07 |
| VHH-72 <sup>b</sup>               | 1.23E+06 | 1.06E-01 | 8.62E-08 | 1.05E+06 | 1.01E-01 | 9.60E-08 | 8.01E+05 | 9.92E-02 | 1.24E-07 | 1.01E+06 | 6.56E-03 | 6.52E-09 |
| NRCsdAb<br>022 <sup>b</sup>       | -        | -        | -        | -        | -        | -        | -        | -        | -        | -        | -        | -        |

<sup>a</sup>Binding parameters were determined by flowing monomeric V<sub>H</sub>Hs over sensorchip surfaces immobilized with S, except for V<sub>H</sub>H 12 and MRed05, which were obtained by flowing monomeric RBDs (aa319-541 [SARS-CoV-2]; aa306-527 [SARS-CoV]) over V<sub>H</sub>H-Fc-captured surfaces. Dashes indicate lack of binding. +, V<sub>H</sub>H bound, but poor fitting precluded  $K_a$ ,  $k_d$ , and  $K_D$  determinations. See Supplementary Table 1 for the primary structures of spike glycoprotein fragments; <sup>b</sup>ACE2-H<sub>6</sub> and VHH-72<sup>7</sup>, positive controls, EGFR-specific V<sub>H</sub>H NRCsdAb022<sup>8</sup> negative control.



**Supplementary Table 5. Summary of V<sub>HH</sub> stability data.**

| V <sub>HH</sub> | Temperature-induced denaturation | GdnHCl-induced denaturation |                          |                                  |
|-----------------|----------------------------------|-----------------------------|--------------------------|----------------------------------|
|                 | <i>T<sub>m</sub></i> (°C)        | $\Delta G^0$ (kJ/mol)       | <i>C<sub>m</sub></i> (M) | <i>m</i> (kJ/M <sup>2</sup> mol) |
| 1d              | 65.5                             | 27.1                        | 1.8                      | 15.4                             |
| 02              | 67.3                             | 31.3                        | 1.9                      | 16.9                             |
| 03              | 79.5                             | nd                          | nd                       | nd                               |
| 04              | 74.9                             | 30.9                        | 2.1                      | 14.8                             |
| 05              | 70.1                             | 37.4                        | 2.2                      | 16.7                             |
| 06              | 71.9                             | 44                          | 2.3                      | 18.7                             |
| 07              | 79.8                             | 31.3                        | 2.3                      | 13.6                             |
| 10              | 68.8                             | 35.8                        | 2.1                      | 17.1                             |
| 11              | 60.4                             | 21.4                        | 1.6                      | 13.1                             |
| 12              | 65.2                             | nd                          | nd                       | nd                               |
| 14              | 68.9                             | 27.5                        | 2.2                      | 12.3                             |
| 15              | 76.9                             | 35.9                        | 2.2                      | 16                               |
| 17              | 73.3                             | 35                          | 2.6                      | 13.6                             |
| 18 <sup>a</sup> | 67.3                             | nd                          | 0.3                      | nd                               |
| 20              | 76.1                             | nd                          | nd                       | nd                               |
| MRed04          | 71.3                             | 24.6                        | 2.0                      | 12.1                             |
| MRed05          | 69.7                             | nd                          | nd                       | nd                               |
| SR01            | 77.4                             | nd                          | nd                       | nd                               |
| SR02            | 63.4                             | nd                          | nd                       | nd                               |
| SR03            | 76.3                             | 53.4                        | 3.1                      | 17.5                             |
| SR04            | 66.5                             | 30.5                        | 1.9                      | 15.9                             |
| SR13            | 69.7                             | 28.5                        | 2.0                      | 14                               |
| SR16            | 59.6                             | nd                          | nd                       | nd                               |
| S2A3            | 61.2                             | nd                          | nd                       | nd                               |
| S2A4            | 70.4                             | 29.5                        | 1.9                      | 15.4                             |
| S2F3            | 64.6                             | nd                          | nd                       | nd                               |
| S2G3            | 70.4                             | nd                          | nd                       | nd                               |
| S2G4            | 69.3                             | 28.4                        | 2.2                      | 12.9                             |
| MRed03          | 79.8                             | 25.4                        | 2.5                      | 10.3                             |
| MRed06          | 59.1                             | nd                          | nd                       | nd                               |
| MRed07          | 68.4                             | 26                          | 2.2                      | 12.1                             |
| MRed11          | 65.1                             | nd                          | nd                       | nd                               |
| MRed18          | 72.5                             | nd                          | nd                       | nd                               |
| MRed19          | 69.1                             | nd                          | nd                       | nd                               |
| MRed20          | 77.1                             | 43.1                        | 2.2                      | 19.8                             |
| MRed22          | 72.5                             | 31.3                        | 2.2                      | 14.3                             |
| MRed25          | 70.5                             | 25.9                        | 2.4                      | 10.7                             |
| VHH-72          | 73                               | 30.9                        | 2.3                      | 13.6                             |

<sup>a</sup>Lack of a lower plateau due to an immediate melting upon exposure to the denaturant did not allow for a reliable curve fitting, hence  $\Delta G^0$  and  $m$  values for V<sub>H</sub>H 18 could not be obtained. nd, not determined. Data were used to construct Fig. 3b and Fig. 3c.

**Supplementary Table 6. Stability of V<sub>H</sub>Hs against aerosolization.**

| V <sub>H</sub> H | Recovery (%) <sup>a</sup> | Soluble aggregates (%) <sup>b</sup> |                     | ΔSoluble agg. <sup>c</sup> | Visible aggregates |
|------------------|---------------------------|-------------------------------------|---------------------|----------------------------|--------------------|
|                  |                           | Pre-aerosolization                  | Post-aerosolization |                            |                    |
| 1d               | 83                        | 2                                   | 4                   | 2                          | No                 |
| 02               | 89                        | 2                                   | 2                   | 0                          | No                 |
| 03               | 81                        | 2                                   | 1                   | -1                         | No                 |
| 04               | 62                        | 6                                   | 5                   | -1                         | Yes                |
| 05               | 89                        | 2                                   | 5                   | 3                          | No                 |
| 06               | 51                        | 7                                   | 5                   | -2                         | Yes                |
| 07               | 75                        | 2                                   | 3                   | 1                          | No                 |
| 10               | 83                        | 5                                   | 5                   | 0                          | No                 |
| 11               | 24                        | 6                                   | 5                   | -1                         | Yes                |
| 14               | 55                        | 6                                   | 6                   | 0                          | Yes                |
| 15               | 69                        | 4                                   | 5                   | 1                          | Yes                |
| 17               | 85                        | 5                                   | 6                   | 1                          | No                 |
| 18               | 99                        | 9                                   | 5                   | -4                         | No                 |
| 20               | 97                        | 2                                   | 1                   | -1                         | No                 |
| SR03             | 43                        | 3                                   | 11                  | 8                          | Yes                |
| SR04             | 52                        | 5                                   | 3                   | -2                         | Yes                |
| SR13             | 83                        | 4                                   | 6                   | 2                          | No                 |
| S2A4             | 84                        | 7                                   | 11                  | 4                          | No                 |
| S2G4             | 91                        | 3                                   | 6                   | 3                          | No                 |
| MRed03           | 96                        | 3                                   | 2                   | -1                         | No                 |
| MRed04           | 59                        | 4                                   | 4                   | 0                          | Yes                |
| MRed07           | 90                        | 10                                  | 3                   | -7                         | No                 |
| MRed11           | 89                        | 4                                   | 5                   | 1                          | No                 |
| MRed18           | 96                        | 3                                   | 10                  | 7                          | No                 |
| MRed19           | 87                        | 5                                   | 9                   | 4                          | No                 |
| MRed20           | 76                        | 2                                   | 18                  | 16                         | No                 |
| MRed22           | 86                        | 3                                   | 9                   | 6                          | No                 |
| MRed25           | 44                        | 3                                   | 3                   | 0                          | Yes                |
| VHH-72           | 78                        | 1                                   | 14                  | 13                         | No                 |

<sup>a</sup>% recovery was determined as the proportion of a V<sub>H</sub>H that remained monomer following aerosolization. Data were used to construct Fig. 3e (left panel) and Fig. 3e (middle panel); <sup>b</sup>% soluble aggregate was determined as the proportion of a V<sub>H</sub>H that gave elution volume(s) smaller than that for the monomeric V<sub>H</sub>H fraction; <sup>c</sup>ΔSoluble agg. = “Post-aerosolization” – “Pre-aerosolization”.

**Supplementary Table 7. V<sub>H</sub>H binding data obtained by tandem SPR SVNAs against surface-immobilized SARS-CoV-2 S.**

| Summary orientation #1: V <sub>H</sub> H followed by V <sub>H</sub> H + ACE2 |            |            |                                           |                                           |                            |         | Summary orientation #2: ACE2 followed by ACE2 + V <sub>H</sub> H |            |            |                                           |                                           |                            |         |
|------------------------------------------------------------------------------|------------|------------|-------------------------------------------|-------------------------------------------|----------------------------|---------|------------------------------------------------------------------|------------|------------|-------------------------------------------|-------------------------------------------|----------------------------|---------|
| Cycle                                                                        | Solution 1 | Solution 2 | End 1 <sup>st</sup> inj <sup>a</sup> (RU) | End 2 <sup>nd</sup> inj <sup>a</sup> (RU) | inj <sup>a</sup> 2-1 (ΔRU) | Blocker | Cycle                                                            | Solution 1 | Solution 2 | End 1 <sup>st</sup> inj <sup>a</sup> (RU) | End 2 <sup>nd</sup> inj <sup>a</sup> (RU) | inj <sup>a</sup> 2-1 (ΔRU) | Blocker |
| 1                                                                            | Buffer     | ACE2       | -3.1                                      | 56                                        | 59.1                       | No      | 1                                                                | -          | -          | -                                         | -                                         | -                          | -       |
| 2                                                                            | 1d         | 1d+ACE2    | 26.3                                      | 40                                        | 13.7                       | Yes     | 2                                                                | ACE2       | 1d+ACE2    | 57.1                                      | 56.4                                      | -0.7                       | Yes     |
| 3                                                                            | 02         | 02+ACE2    | 33                                        | 39.3                                      | 6.3                        | Yes     | 3                                                                | ACE2       | 02+ACE2    | 55.8                                      | 59.6                                      | 3.8                        | Yes     |
| 4                                                                            | 03         | 03+ACE2    | 18.1                                      | 82.3                                      | 64.2                       | No      | 4                                                                | ACE2       | 03+ACE2    | 52.8                                      | 75.3                                      | 22.5                       | No      |
| 5                                                                            | 04         | 04+ACE2    | 41.4                                      | 95.8                                      | 54.4                       | No      | 5                                                                | ACE2       | 04+ACE2    | 52.4                                      | 98.8                                      | 46.4                       | No      |
| 6                                                                            | 05         | 05+ACE2    | 36.9                                      | 46.8                                      | 9.9                        | Yes     | 6                                                                | ACE2       | 05+ACE2    | 52.2                                      | 60.5                                      | 8.3                        | Yes     |
| 7                                                                            | 06         | 06+ACE2    | 38.5                                      | 92.2                                      | 53.7                       | No      | 7                                                                | ACE2       | 06+ACE2    | 52.3                                      | 94.4                                      | 42.1                       | No      |
| 8                                                                            | 07         | 07+ACE2    | 19.1                                      | 37.5                                      | 18.4                       | Yes     | 8                                                                | ACE2       | 07+ACE2    | 52                                        | 59.1                                      | 7.1                        | Yes     |
| 10                                                                           | 10         | 10+ACE2    | 9.6                                       | 58.8                                      | 49.2                       | No      | 10                                                               | ACE2       | 10+ACE2    | 52.1                                      | 64.1                                      | 12                         | No      |
| 11                                                                           | 11         | 11+ACE2    | 21.8                                      | 80.7                                      | 58.9                       | No      | 11                                                               | ACE2       | 11+ACE2    | 52.3                                      | 83.6                                      | 31.3                       | No      |
| 12                                                                           | 14         | 14+ACE2    | 26.9                                      | 70.4                                      | 43.5                       | +/-     | 13                                                               | ACE2       | 14+ACE2    | 52.3                                      | 75.9                                      | 23.6                       | No      |
| 13                                                                           | 15         | 15+ACE2    | 10.1                                      | 50.7                                      | 40.6                       | +/-     | 14                                                               | ACE2       | 15+ACE2    | 50                                        | 59.7                                      | 9.7                        | No      |
| 14                                                                           | 17         | 17+ACE2    | 16.7                                      | 69.5                                      | 52.8                       | No      | 16                                                               | ACE2       | 17+ACE2    | 52                                        | 71.7                                      | 19.7                       | No      |
| 15                                                                           | 18         | 18+ACE2    | 12.6                                      | 52.5                                      | 39.9                       | +/-     | 17                                                               | ACE2       | 18+ACE2    | 50.9                                      | 61.7                                      | 10.8                       | +/-     |
| 16                                                                           | 20         | 20+ACE2    | 27.1                                      | 60.5                                      | 33.4                       | +/-     | 18                                                               | ACE2       | 20+ACE2    | 51.3                                      | 66.2                                      | 14.9                       | +/-     |
| 17                                                                           | SR01       | SR01+ACE2  | 39.4                                      | 92                                        | 52.6                       | No      | 19                                                               | ACE2       | SR01+ACE2  | 51.4                                      | 97.2                                      | 45.8                       | No      |
| 18                                                                           | SR02       | SR02+ACE2  | 10.3                                      | 60.2                                      | 49.9                       | No      | 20                                                               | ACE2       | SR02+ACE2  | 49.1                                      | 67.8                                      | 18.7                       | No      |
| 19                                                                           | SR03       | SR03+ACE2  | 18.5                                      | 70.7                                      | 52.2                       | No      | 21                                                               | ACE2       | SR03+ACE2  | 50                                        | 76.4                                      | 26.4                       | No      |
| 20                                                                           | SR04       | SR04+ACE2  | 10.9                                      | 63.6                                      | 52.7                       | No      | 22                                                               | ACE2       | SR04+ACE2  | 50.5                                      | 68.5                                      | 18                         | No      |
| 21                                                                           | SR13       | SR13+ACE2  | 36.9                                      | 86.8                                      | 49.9                       | No      | 12                                                               | ACE2       | SR13+ACE2  | 52.3                                      | 92.8                                      | 40.5                       | No      |
| 22                                                                           | SR16       | SR16+ACE2  | 37.4                                      | 88.8                                      | 51.4                       | No      | 15                                                               | ACE2       | SR16+ACE2  | 52.1                                      | 95.7                                      | 43.6                       | No      |
| 23                                                                           | S2A3       | S2A3+ACE2  | 15                                        | 82                                        | 67                         | No      | 23                                                               | ACE2       | S2A3+ACE2  | 50.8                                      | 72.2                                      | 21.4                       | No      |
| 24                                                                           | S2A4       | S2A4+ACE2  | 11.6                                      | 73.3                                      | 61.7                       | No      | 24                                                               | ACE2       | S2A4+ACE2  | 50.9                                      | 71.1                                      | 20.2                       | No      |
| 25                                                                           | S2F3       | S2F3+ACE2  | 50                                        | 111.1                                     | 61.1                       | No      | 25                                                               | ACE2       | S2F3+ACE2  | 50.7                                      | 106.9                                     | 56.2                       | No      |
| 26                                                                           | S2G3       | S2G3+ACE2  | 59                                        | 113.2                                     | 54.2                       | No      | 26                                                               | ACE2       | S2G3+ACE2  | 51                                        | 114.1                                     | 63.1                       | No      |

|    |        |             |      |      |      |            |    |      |             |      |      |      |            |
|----|--------|-------------|------|------|------|------------|----|------|-------------|------|------|------|------------|
| 27 | S2G4   | S2G4+ACE2   | 21.3 | 81.7 | 60.4 | <b>No</b>  | 27 | ACE2 | S2G4+ACE2   | 50.9 | 79.3 | 28.4 | <b>No</b>  |
| 28 | MRed04 | MRed04+ACE2 | 31.9 | 73.3 | 41.1 | <b>No</b>  | 29 | ACE2 | MRed04+ACE2 | 62.6 | 73.3 | 10.7 | <b>+/-</b> |
| 29 | VHH-72 | VHH-72+ACE2 | 25.8 | 37.8 | 12   | <b>Yes</b> | 28 | ACE2 | VHH-72+ACE2 | 51   | 51.2 | 0.2  | <b>Yes</b> |

<sup>a</sup>inj, injection. V<sub>H</sub>Hs were used at 20 – 40× *K<sub>D</sub>* concentrations, ACE2 (ACE2-H<sub>6</sub>) used at 1 μM.

Supplementary Table 8. Flow cytometry SVNAs against SARS-CoV-2 variants and SARS-CoV.

| V <sub>H</sub> H-Fc                | SVNA IC <sub>50</sub> (nM) |       |      |       |       |       |                      | SARS-CoV S |
|------------------------------------|----------------------------|-------|------|-------|-------|-------|----------------------|------------|
|                                    | SARS-CoV-2 S               |       |      |       |       |       |                      |            |
|                                    | Wuhan                      | Alpha | Beta | Gamma | Delta | Kappa | Omicron <sup>a</sup> |            |
| <b>RBD-specific V<sub>H</sub>H</b> |                            |       |      |       |       |       |                      |            |
| 1d                                 | 4.7                        | 6.1   | 13.1 | 4.8   | 6.4   | 5.5   | -                    | -          |
| 02                                 | 4.7                        | 4.2   | -    | -     | 8.4   | 7.2   | -                    | -          |
| 03                                 | -                          | -     | -    | -     | -     | -     | -                    | -          |
| 04                                 | 10.8                       | 21.9  | -    | -     | -     | -     | 18.4                 | -          |
| 05                                 | 4.9                        | 4.8   | -    | -     | 7.6   | 6.8   | -                    | -          |
| 06                                 | -                          | -     | -    | -     | -     | -     | -                    | -          |
| 07                                 | 4.7                        | 5.7   | 3.6  | 3.2   | 2.3   | 3.6   | -                    | 4.2        |
| 10                                 | 8.8                        | 11.3  | 10.8 | 21.8  | -     | -     | 4.3                  | -          |
| 11                                 | 3.2                        | 6.6   | 10.7 | 4.7   | 7.7   | 3.3   | 8.8                  | 7.7        |
| 12                                 | 3.5                        | 5.2   | 8    | 3.4   | 6.4   | 6.2   | 17.2                 | 3.1        |
| 14                                 | 7.5                        | 18    | 58   | 177   | -     | -     | 5.2                  | -          |
| 15                                 | 5.8                        | 9.8   | 12.2 | 10.8  | -     | -     | 3                    | -          |
| 17                                 | 8.6                        | 10.6  | 26.4 | 214   | -     | -     | 3.4                  | -          |
| 18                                 | 9.1                        | 12.2  | 16.6 | 12.1  | 10.2  | 17.4  | -                    | 12.7       |
| 20                                 | 6.5                        | 5.2   | 11.9 | 7.5   | 12.6  | 4.1   | 13.1                 | 10.3       |
| MRed04                             | 5                          | 6.4   | 24.4 | 8.7   | 11.8  | 10.4  | -                    | 24.6       |
| MRed05                             | 4.3                        | 4.2   | 4.4  | 4.7   | 4.8   | 4.8   | -                    | -          |
| <b>NTD-specific V<sub>H</sub>H</b> |                            |       |      |       |       |       |                      |            |
| SR01                               | 4.2                        | 3.1   | 8.8  | 2.1   | 3.1   | 2.3   | 4.4                  | 5.1        |
| SR02                               | 1.7                        | 7.3   | -    | 4.7   | 6.1   | 3.1   | -                    | -          |
| SR13                               | 7.7                        | 22.4  | -    | 16.5  | -     | 12.2  | -                    | 15         |
| <b>Reference</b>                   |                            |       |      |       |       |       |                      |            |
| VHH-72                             | 5.6                        | 10.6  | 5.1  | 3.3   | 10.5  | 8.5   | -                    | 7.8        |

<sup>a</sup>Omicron B.1.1.529. Dash indicates lack of neutralization.

**Supplementary Table 9. Summary of HDX-MS experimental conditions and statistics.**

| Data Set                                   | Batch 1                                                                                          | Batch 2                                     | Batch 3                  | Batch 4                   | Batch 5                      | Batch 6                      | Batch 7    |
|--------------------------------------------|--------------------------------------------------------------------------------------------------|---------------------------------------------|--------------------------|---------------------------|------------------------------|------------------------------|------------|
| Target protein                             | RBD <sup>b</sup>                                                                                 | S1                                          |                          |                           |                              | S                            |            |
| Protein states included                    | VHH-72                                                                                           | 03, 11, SR03,<br>SR04,<br>MRed03,<br>MRed07 | 04, 05, 06,<br>10,14, 15 | 02, 17, 18,<br>1d, MRed04 | 07, 20, MRed05<br>SR01, SR02 | 12,<br>MRed06,<br>SR13, SR16 | S2A3       |
| Technical replicates                       | 3                                                                                                |                                             |                          |                           | 4                            |                              |            |
| HDX time course (min)                      | 5                                                                                                | 3                                           |                          |                           |                              | 1                            |            |
| HDX reaction details                       | 10 mM Tris, pD = 7.0, 20°C in 45% D <sub>2</sub> O                                               |                                             |                          |                           |                              |                              |            |
| Protease for on-line digestion             | Pepsin                                                                                           |                                             |                          |                           |                              | Nepenthesin-II               |            |
| LC gradient                                | 1-35% ACN, 8 min                                                                                 |                                             |                          |                           |                              | 2-40% ACN,<br>15 min         |            |
| # of peptides found across all samples     | 69                                                                                               | 215                                         | 222                      | 219                       | 196                          | 217                          | 278        |
| Sequence coverage                          | 76                                                                                               | 71                                          | 75                       | 75                        | 75                           | 74                           | 75         |
| Average peptide length / Redundancy        | 15.2/5.5                                                                                         | 15.1/4.9                                    | 13.7/4.5                 | 13.7 / 4.5                | 13.7/4.5                     | 14.3/4.7                     | 12.2 / 2.8 |
| Repeatability (average standard deviation) | 0.5                                                                                              | 0.8                                         | 0.9                      | 0.9                       | 0.9                          | 0.7                          | 1.2        |
| 3 x SD cut-off <sup>a</sup>                | 4.3                                                                                              | 6                                           | 4.7                      | 5                         | 4.9                          | 6.3                          | 3.5        |
| Significant differences in HDX             | Two-state student T-Test performed for each state ( $\Delta D > 3 \times SD$ , 1-p value > 0.98) |                                             |                          |                           |                              |                              |            |

<sup>a</sup>SD cutoff was calculated for each state within a batch, and the highest cutoff was applied to all states in that batch; <sup>b</sup>RBD\_short (aa331-521).

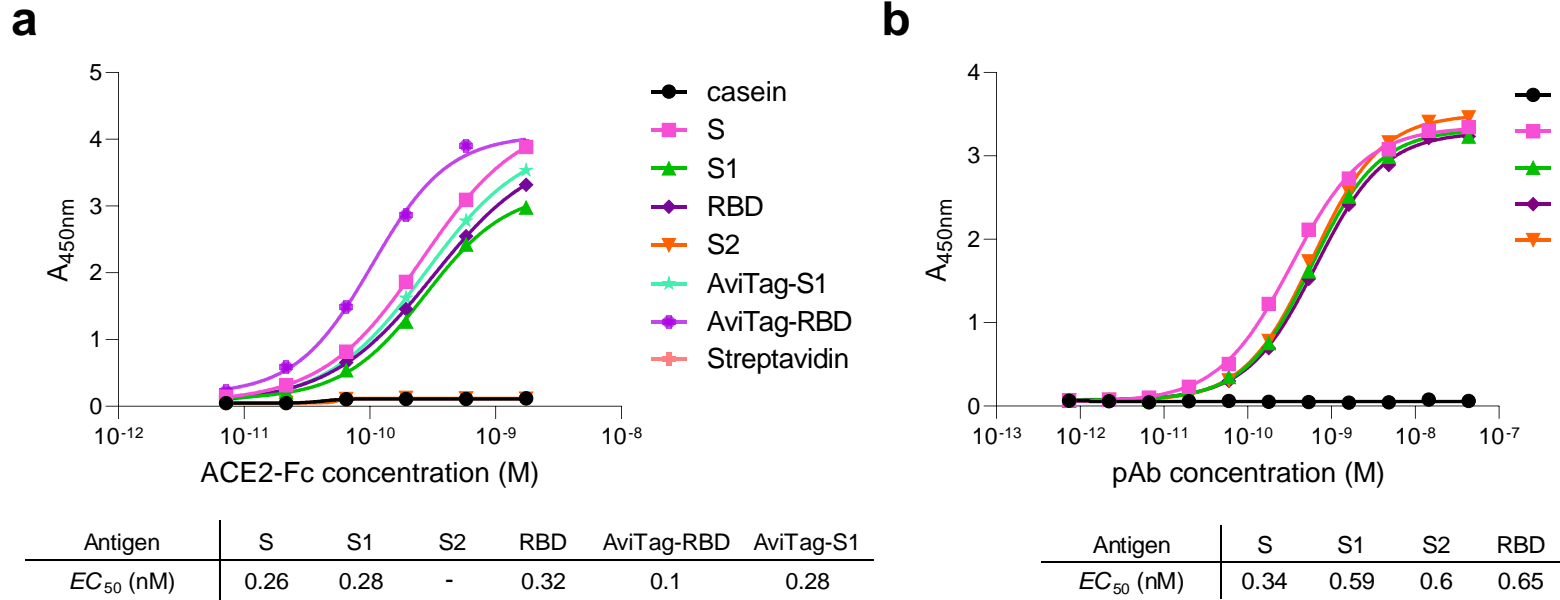

**Supplementary Figure 1. Antigen validation.** Prior to immunization, serology and panning experiments, SARS-CoV-2 spike protein antigens were validated for functionality in adsorbed/captured states on microtiter wells by measuring their binding to ACE2 and an anti-S polyclonal antibody. **a** ELISA assessing the binding of microtiter well-adsorbed (S, S1, S2 and RBD) and microtiter well-captured (AviTag-S1, AviTag-RBD) SARS-CoV-2 spike glycoprotein fragments to their human receptor ACE2 (fused to human IgG1, ACE2-Fc). AviTag-S1 and AviTag-RBD were captured on streptavidin-coated microtiter wells through their C-terminal biotin tag. **b** ELISA confirming the binding of microtiter well-adsorbed SARS-CoV-2 spike glycoprotein fragments S, S1, S2 and RBD to a commercial rabbit anti-SARS-CoV-2 S polyclonal antibody (pAb). No binding was observed to S2 (**a**) or to casein (**a** & **b**), demonstrating binding specificities. Calculated  $EC_{50}$ s (half-maximal effective concentration) are tabulated below the graphs. SARS-CoV-2 Wuhan spike glycoprotein fragments were used in the assays.



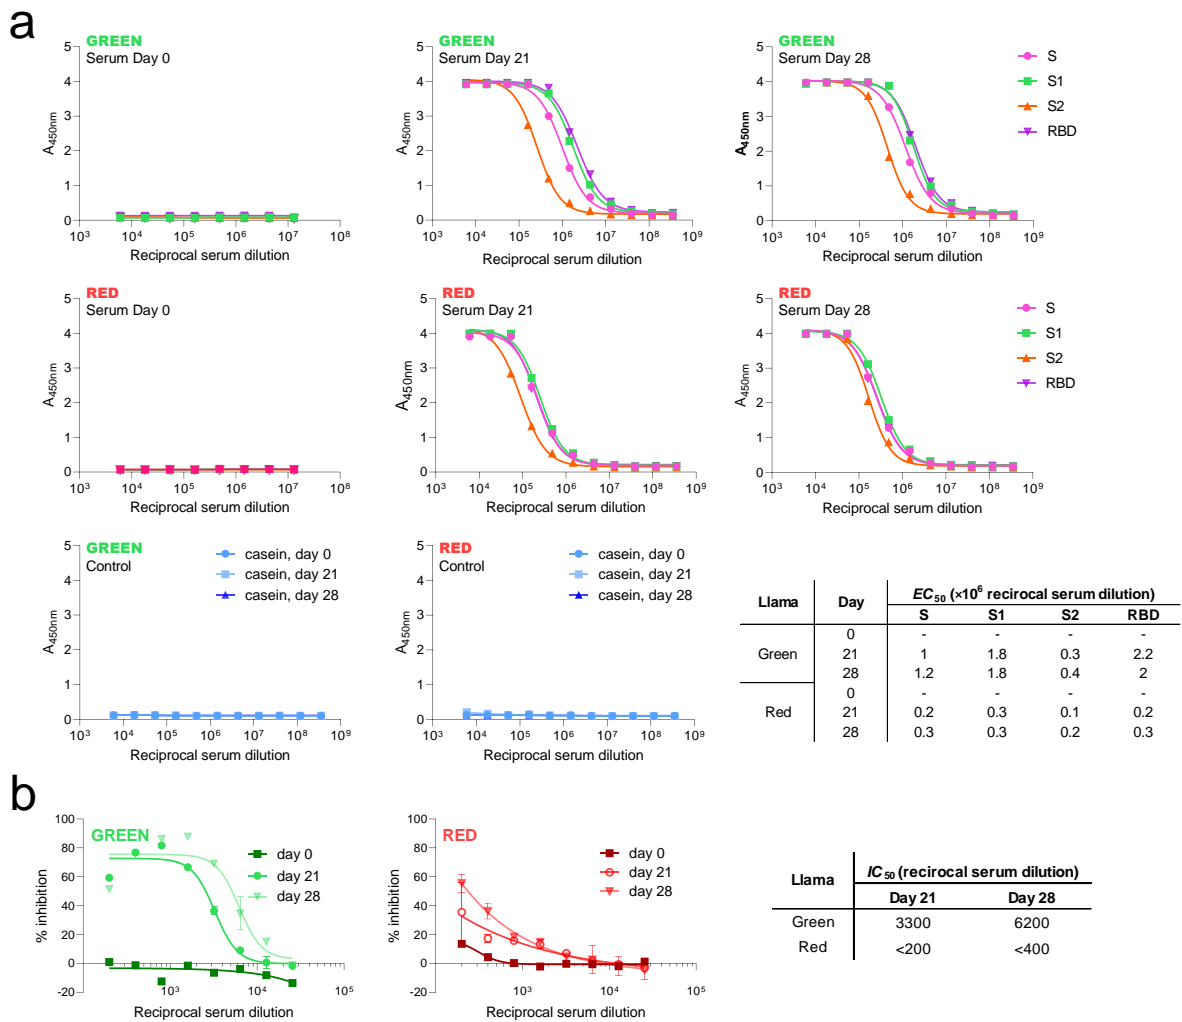

**Supplementary Figure 2. Llama serology.** **a** ELISA performed with pre-immune (day 0) and immune (days 21 and 28) sera demonstrated SARS-CoV-2 spike glycoprotein-immunized llamas Green and Red generated strong immune responses towards S, S1, S2 and RBD. ELISA performed with day 0, 21 and 28 sera showed immunized llama sera did not react with non-target antigen (casein), demonstrating specificity of the immune response.  $EC_{50}$ , measures of the strength of immune response, are shown in the table. Based on  $EC_{50}$  values, Green generated a stronger immune response in comparison to Red, up to 10-fold, consistently across all four spike protein fragments. **b** Flow cytometry surrogate virus neutralization assays (SVNAs) performed with pre-immune (day 0) and immune (days 21 and 28) sera demonstrated llama Green mounted a polyclonal immune response that was more potent in blocking the binding of SARS-CoV-2 S to Vero E6 cell surface-associated ACE2 in comparison to llama Red.  $IC_{50}$ s (half-maximal inhibitory concentrations), measures of the strength of serum neutralization capability, are shown in the table. Due to a lack of complete curves,  $IC_{50}$ s for llama Red sera were estimated by assuming similar upper plateaus as those for

llama Green sera.  $IC_{50}$ s of 3300 (day 21) and 6200 (day 28) reciprocal serum dilution (RSD) were obtained in the case of the Green sera compared to far weaker ones, <200 RSD (day 21) and <400 RSD (day 28), for the Red sera. SARS-CoV-2 Wuhan spike glycoprotein fragments were used for immunizations and in assays. Error bars indicate standard deviation (SD) of two technical replicates.

a

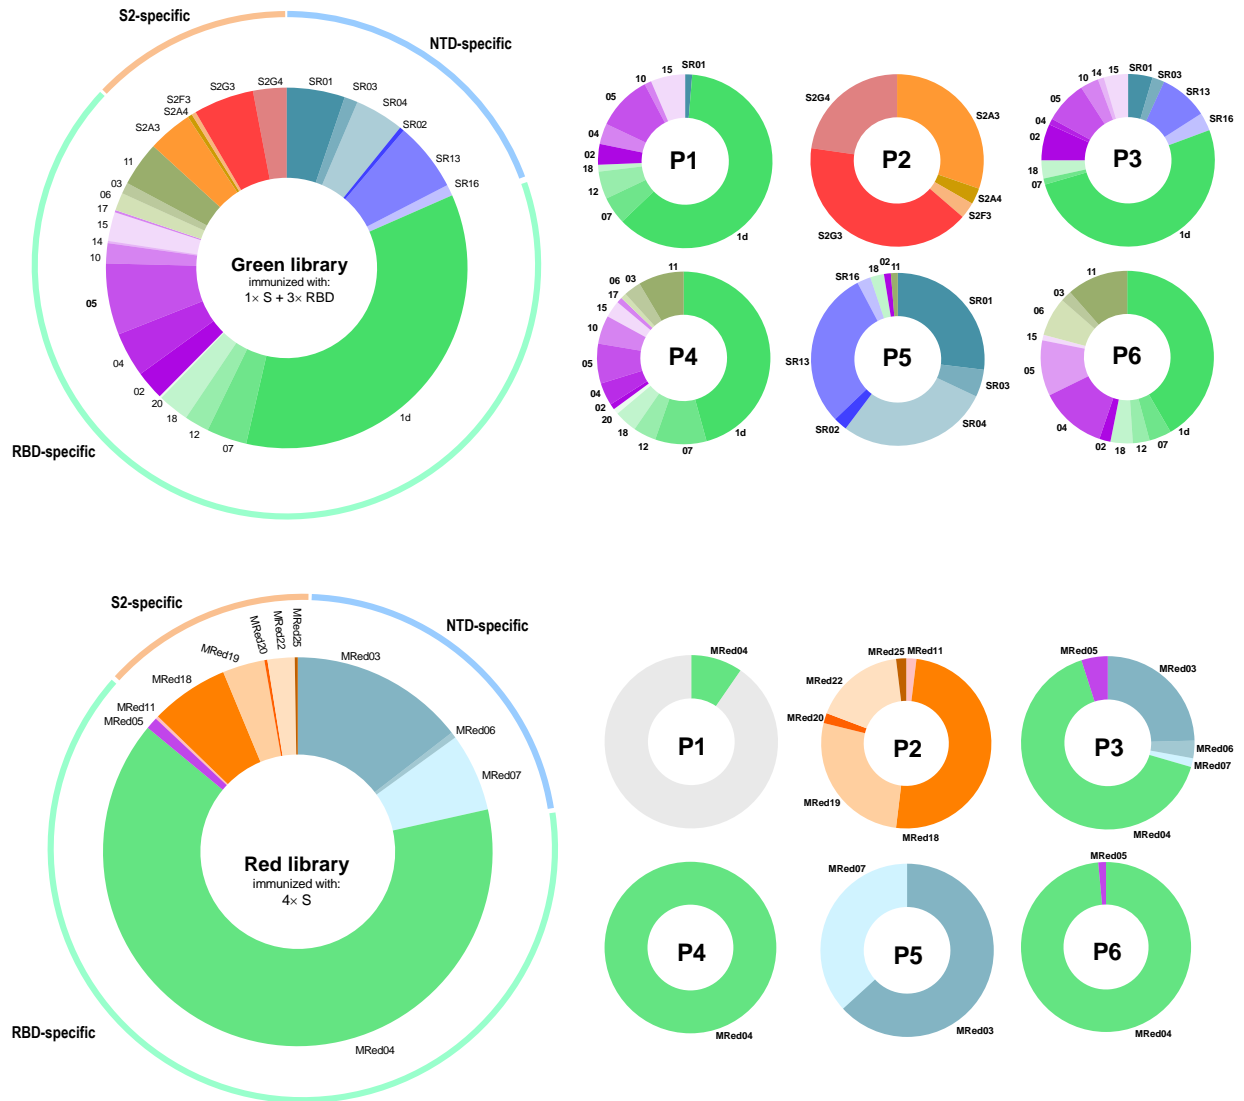

b

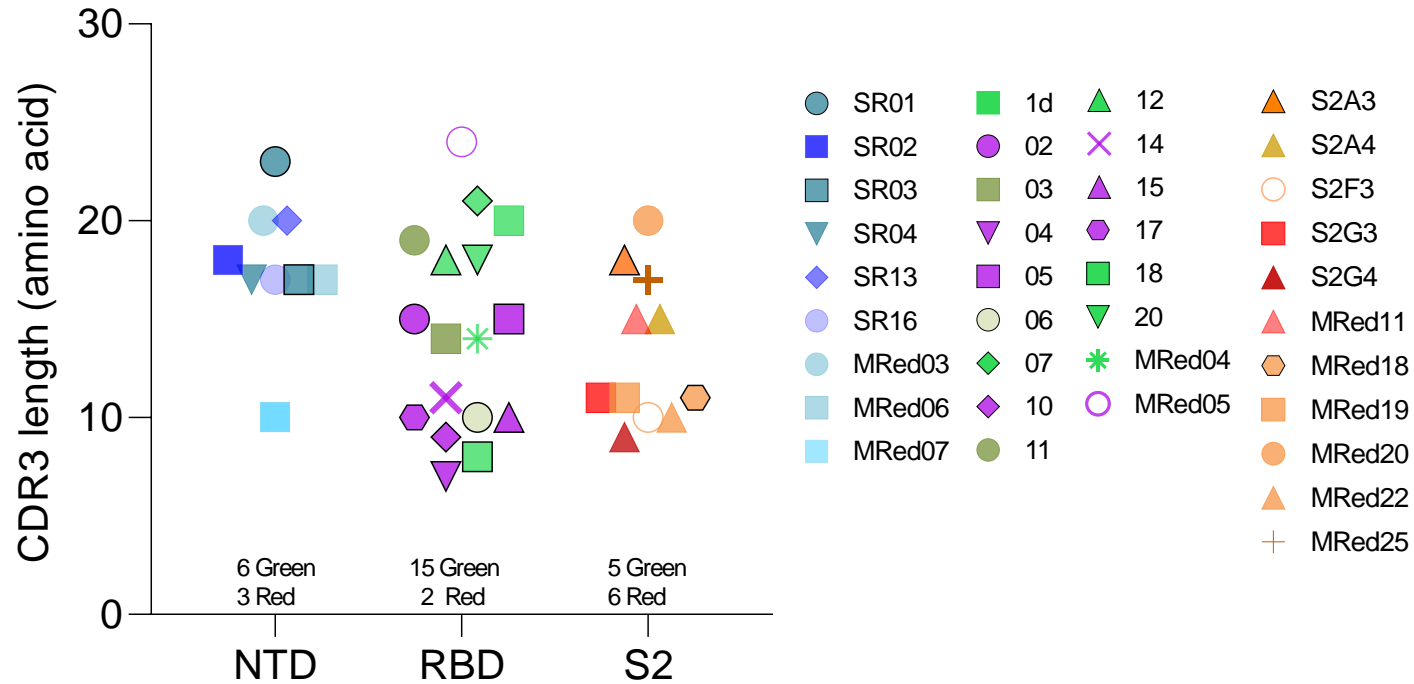

**Supplementary Figure 3. Selection, binding, subunit/domain specificity and CDR3 length heterogeneity of anti-SARS-CoV-2 S V<sub>H</sub>Hs.** V<sub>H</sub>Hs are grouped based on their specificity for NTD, RBD or S2 and color-coded based on their epitope bin designation (see Fig. 1d). **a** Library origin, relative proportion and subunit/domain specificity of the 37 anti-SARS-CoV-2 S V<sub>H</sub>Hs selected from the Green and Red libraries by employing six panning strategies P1 – P6. Binding specificity patterns in P1 – P6 reflect the selection strategies employed. For the Red library, P1 also selected for a V<sub>H</sub>H (MRed09, grey, unlabeled) that was specific to the resistin trimerization domain of the S used for immunization and panning. Green library V<sub>H</sub>Hs were isolated from the llama immunized once with S and three times with RBD. Red library V<sub>H</sub>Hs were isolated from the llama immunized four times with S. **b** Diversity of the 37 SARS-CoV-2 S V<sub>H</sub>Hs shown in terms of CDR3 length. The number of V<sub>H</sub>Hs derived from each of the two libraries are shown.

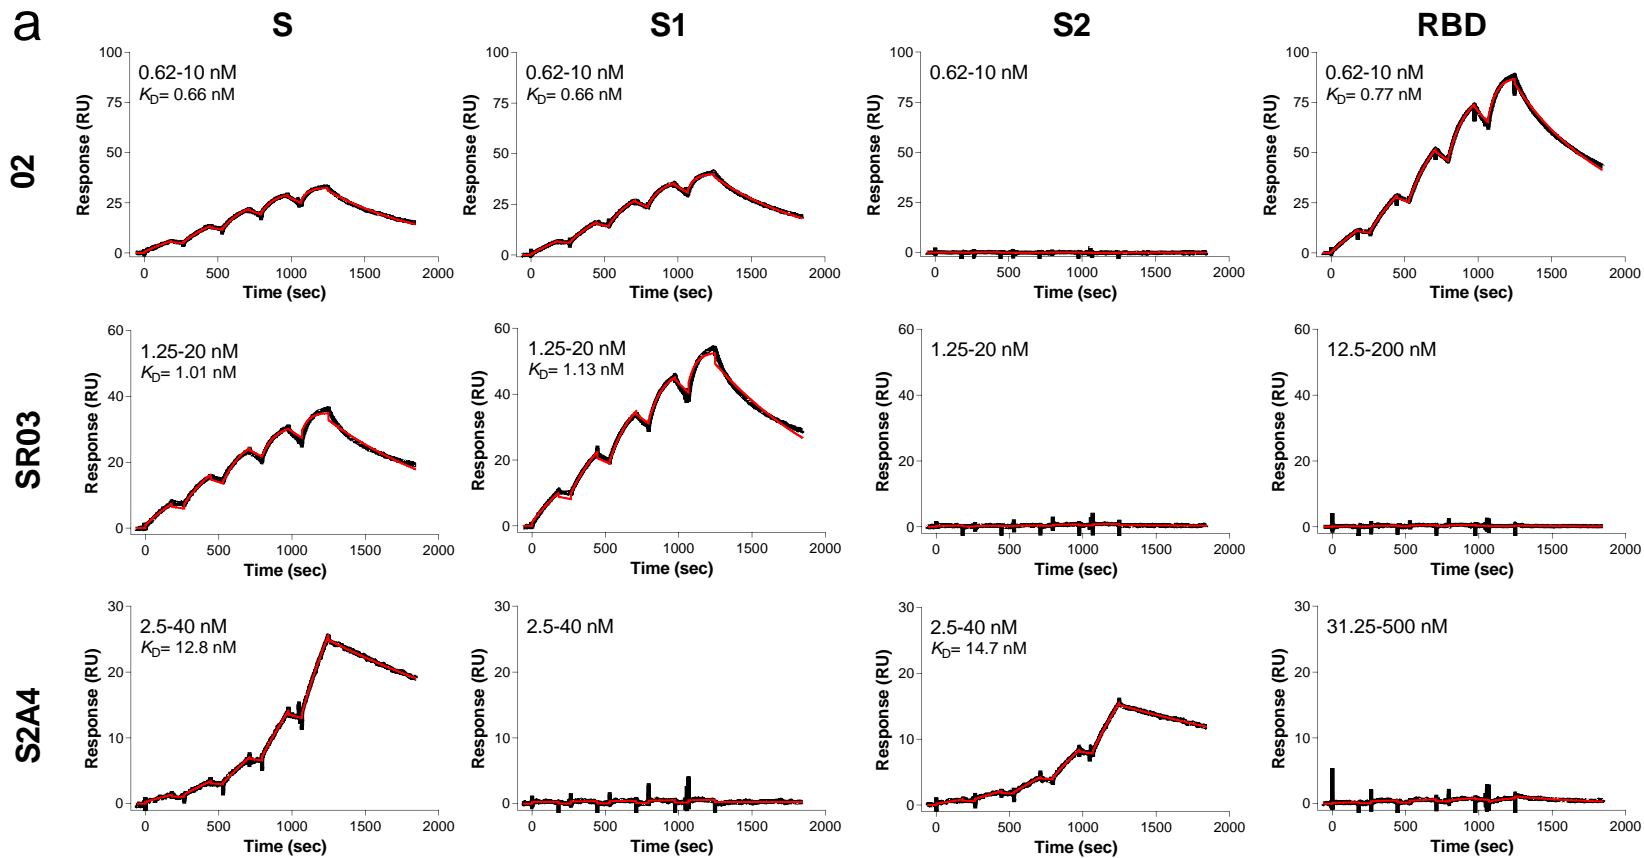

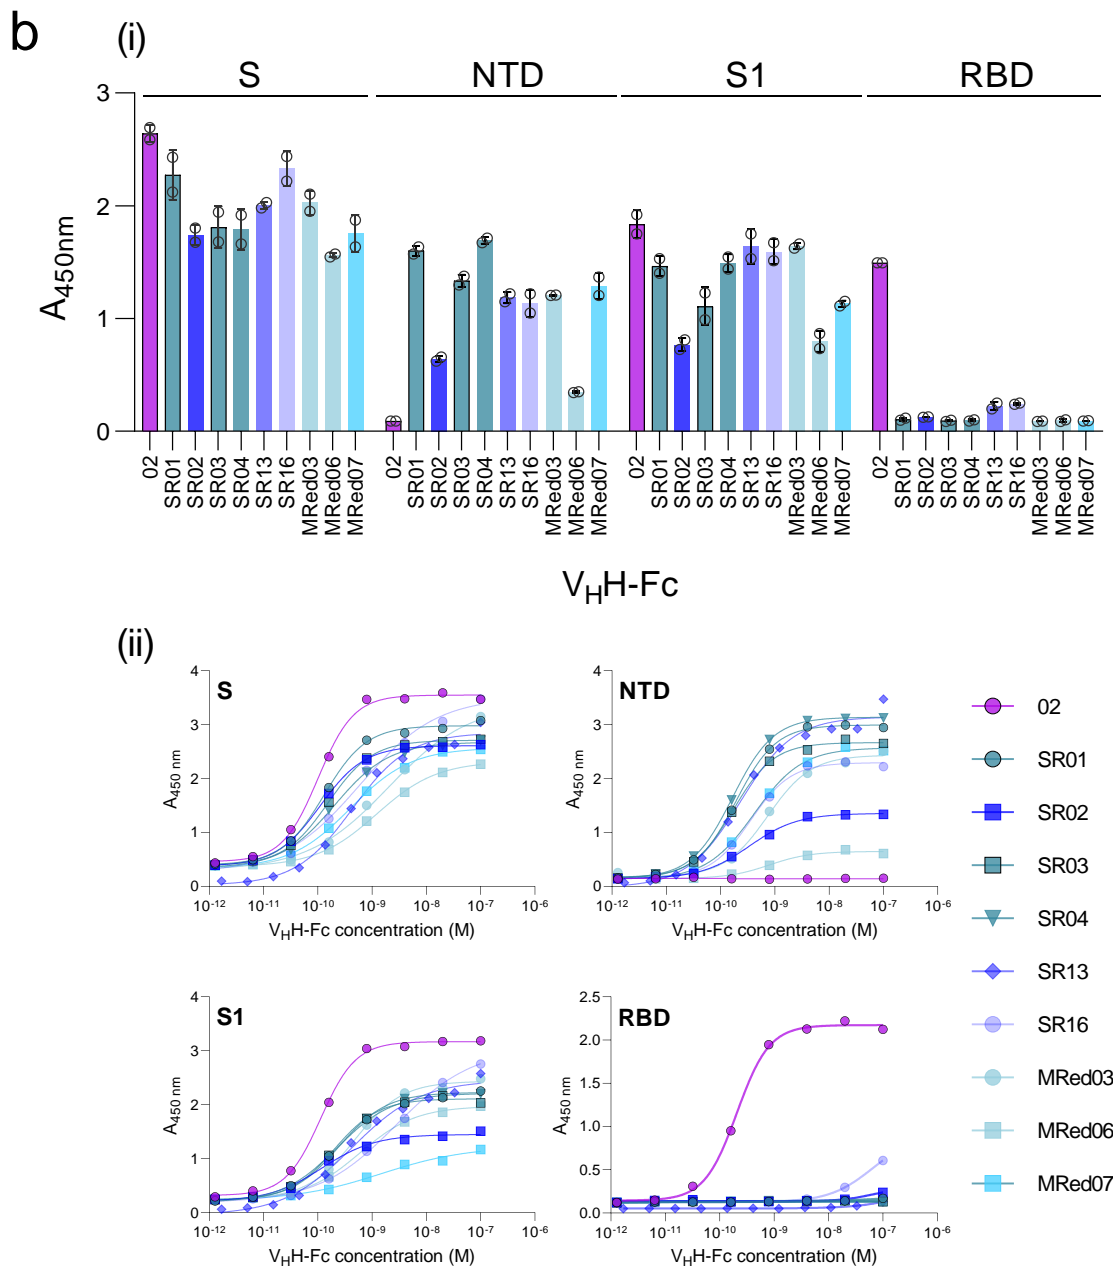

**Supplementary Figure 4. Binding affinity and subunit/domain specificity of SARS-CoV-2  $V_{\text{H}}\text{H}$ s and  $V_{\text{H}}\text{H-Fc}$ s by SPR and ELISA.** **a** Representative SPR sensorgrams showing single-cycle kinetics analysis of 02, SR03 and S2A4  $V_{\text{H}}\text{H}$ s binding to SARS-CoV-2 S, S1, S2 and RBD. Spike glycoprotein fragments were immobilized on CM5 sensorchip surfaces and  $V_{\text{H}}\text{H}$ s flowed over at concentration ranges described in the figure. Black lines represent raw data points; red lines are fits to a 1:1 binding model. 02, SR03 and S2A4 antibodies represent SPR binding profiles for  $V_{\text{H}}\text{H}$ s specific to RBD, NTD and S2, respectively. Calculated kinetic and equilibrium dissociation constants ( $k_{\text{on}}$ ,  $k_{\text{off}}$  and  $K_{\text{D}}$ s) obtained for binding of  $V_{\text{H}}\text{H}$ s against SARS-CoV-2 spike glycoprotein fragments are reported in Table 1, Supplementary Table 2 and Fig. 1b. **b** ELISA

assessing the domain specificity of SARS-CoV-2 V<sub>HH</sub>-Fcs. Assays were performed against SARS-CoV-2 S, S1, NTD and RBD at a fixed (13 nM) (i) or varying (ii) concentrations of V<sub>HH</sub>-Fcs. 02 is included as internal control. Error bars indicate standard deviation (SD) of two technical replicates (i). (ii) Apparent  $EC_{50}$ s ( $EC_{50}$ apps) obtained from graphs are recorded in Supplementary Table 3. SARS-CoV-2 Wuhan spike glycoprotein fragments were used in assays.

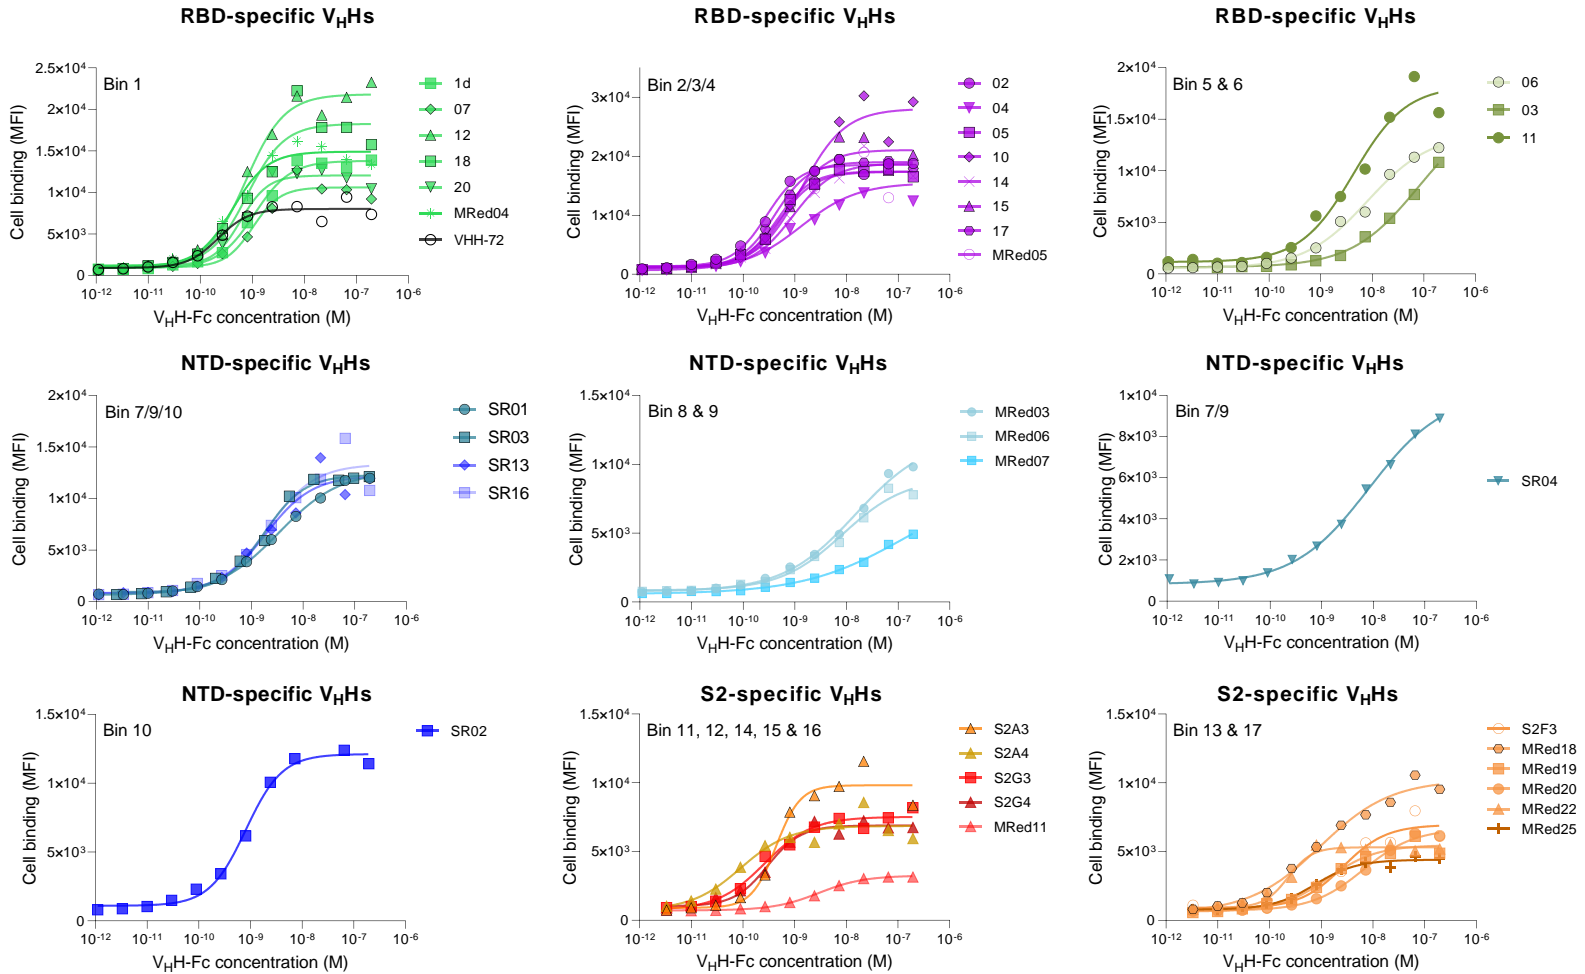

**Supplementary Figure 5. Assessing binding of SARS-CoV-2 V<sub>H</sub>H-Fcs to S-expressing CHO cells (CHO-SPK) by flow cytometry.** Calculated apparent  $EC_{50}$ s ( $EC_{50}apps$ ) obtained from graphs are reported in Table 1 and used in Fig. 1c. None of the V<sub>H</sub>H-Fcs bound to parental non-S-expressing CHO cells at the highest concentration tested (200 nM). MFI, mean fluorescence intensity.



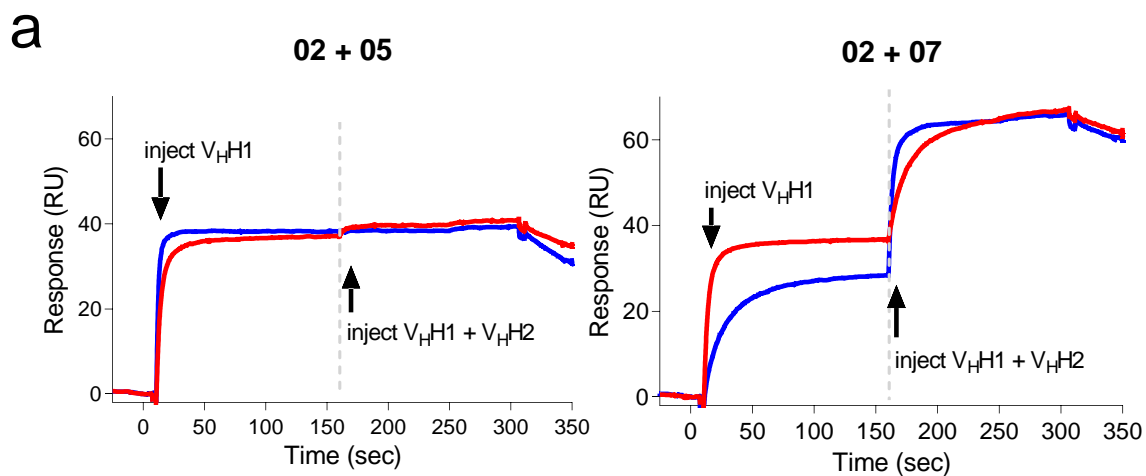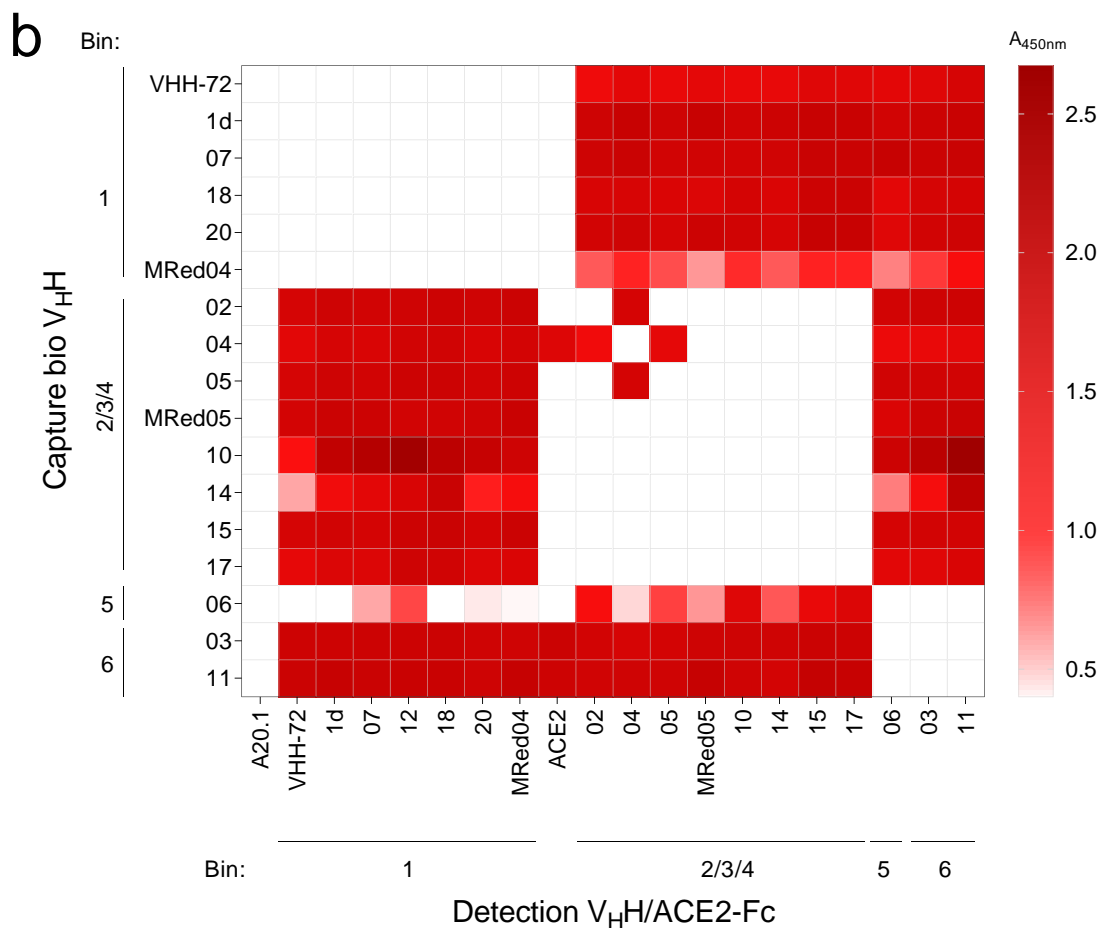

**Supplementary Figure 6. Epitope binning of SARS-CoV-2 V<sub>H</sub>Hs.** **a** Epitope binning by SPR co-injections. Representative sensorgrams showing SPR epitope binning on SARS-CoV-2 Wuhan S-immobilized surface. For each test pair (02 + 05 or 02 + 07), the first V<sub>H</sub>H (V<sub>H</sub>H1) was injected over immobilized S at saturating antigen binding concentration ( $50\times K_D$ ) followed by a second injection containing a mixture of the first

V<sub>HH</sub> and a second V<sub>HH</sub> (V<sub>HH1</sub> + V<sub>HH2</sub>), both at saturating concentrations ( $50\times K_D$ ). Assays were performed in two orientation formats: injecting V<sub>HH1</sub> first (orientation #1; blue profile) or V<sub>HH2</sub> first (orientation #2; red profile), followed by injecting V<sub>HH1</sub> + V<sub>HH2</sub> mix. The 02 + 05 profile represents V<sub>HH</sub> pairs that are interpreted to bind to overlapping epitopes, hence belonging to the same epitope bin, since the injection of the second V<sub>HH</sub> does not result in significant increase in binding (RU) over that already achieved by the injection of the first V<sub>HH</sub>. Conversely, the 02 + 07 profile represents V<sub>HH</sub> pairs that are interpreted to bind to non-overlapping epitopes and belong to different epitope bins, since the addition of the second V<sub>HH</sub> results in a significant increase in binding over that achieved by the injection of the first V<sub>HH</sub>. **b** Epitope binning of RBD V<sub>HH</sub>s by competitive sandwich ELISA. Biotinylated V<sub>HH</sub>s (bio V<sub>HH</sub>s) were captured on streptavidin-coated wells, followed by the addition of SARS-CoV-2 Wuhan S1. The second, detecting V<sub>HH</sub> sets were added as bivalent V<sub>HH</sub>-Fc<sub>s</sub>, followed by the addition of HRP-conjugated anti-Fc antibody to probe V<sub>HH</sub>-Fc binding to S1. ELISA binding results for pair-wise combinations of V<sub>HH</sub>s against S1 are presented as a heat map. Binding pairs giving a binding signal (color) were considered as recognizing non-overlapping epitopes and belong to different epitope bins, while those giving no/weak binding signals (colorless/pale color) were considered recognizing overlapping epitopes and belong to the same epitope bin. V<sub>HH</sub> 12 is not included on the vertical axis as it could not be produced in biotinylated form.

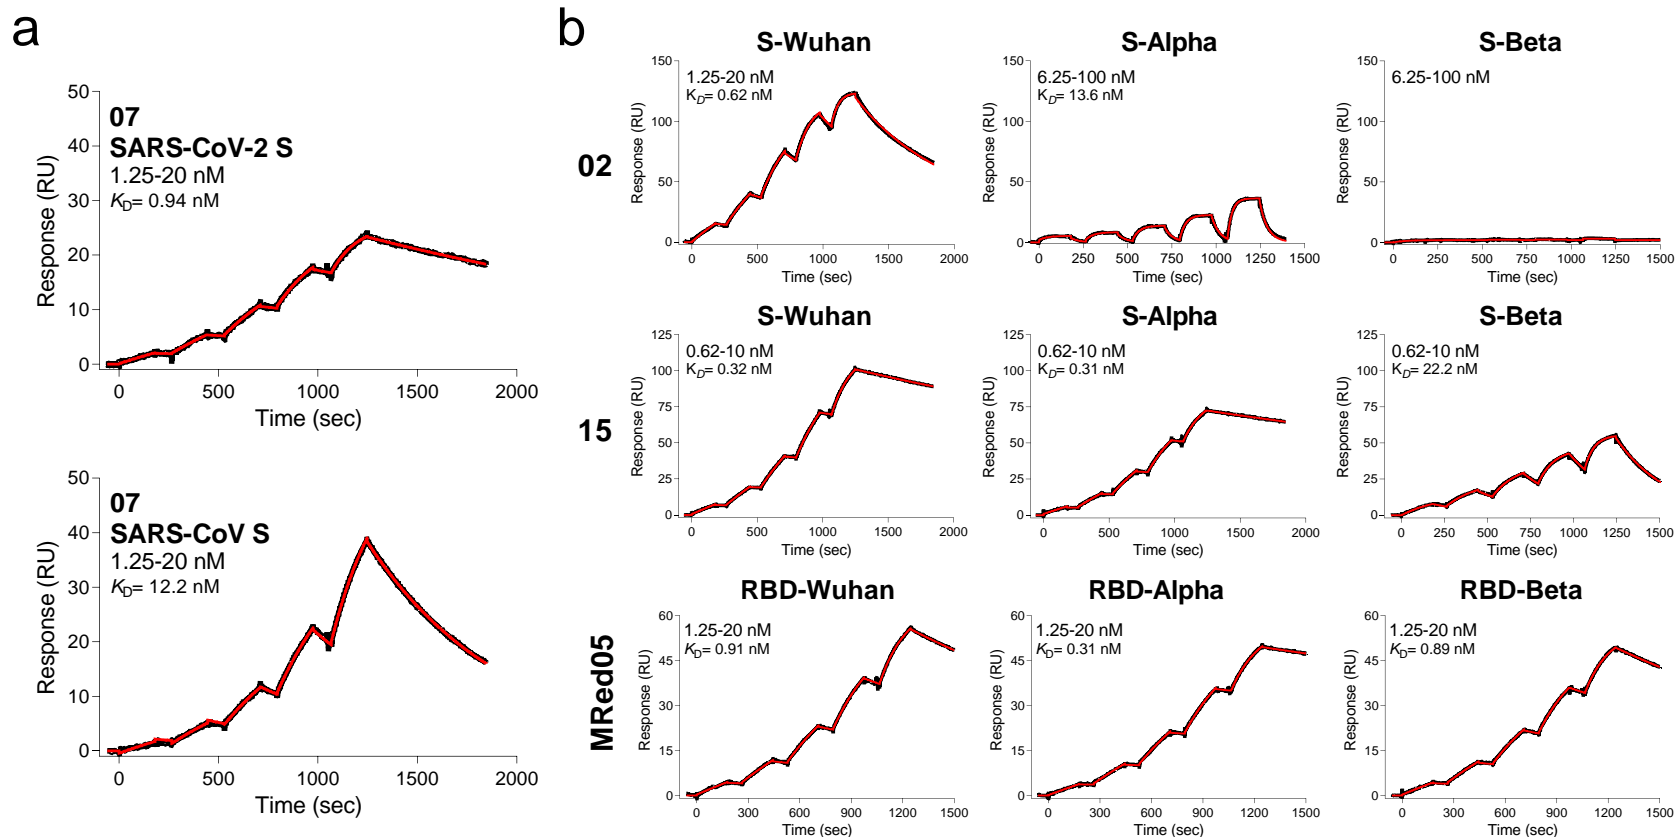

**Supplementary Figure 7. Cross-reactivity assessment of SARS-CoV-2 VHHs by SPR.** Representative SPR sensorgrams showing single-cycle kinetics analysis of 07 binding to SARS-CoV-2 S and SARS-CoV S (**a**), and 02, 15 and MRed05 binding to Wuhan, Alpha and Beta S (02, 15) and RBD (MRed05) (**b**). Spike glycoproteins (S) were immobilized on CM5 sensorchip surfaces followed by flowing 07, 02 and 15 VHHs at concentration ranges described in the figure. MRed05 VHH-Fc was captured on anti-human Fc sensorchip surfaces followed by flowing RBDs at concentration ranges described in the figure. Black lines represent raw data points; red lines are 1:1 model fits. Calculated kinetic and equilibrium dissociation constants ( $k_{as}$ ,  $k_{ds}$  and  $K_Ds$ ) obtained for binding of VHHs/VHH-Fc to spike glycoprotein fragments are reported in Fig. 2b, Fig. 2c, Table 1 and Supplementary Table 4.

## RBD-specific V<sub>H</sub>Hs

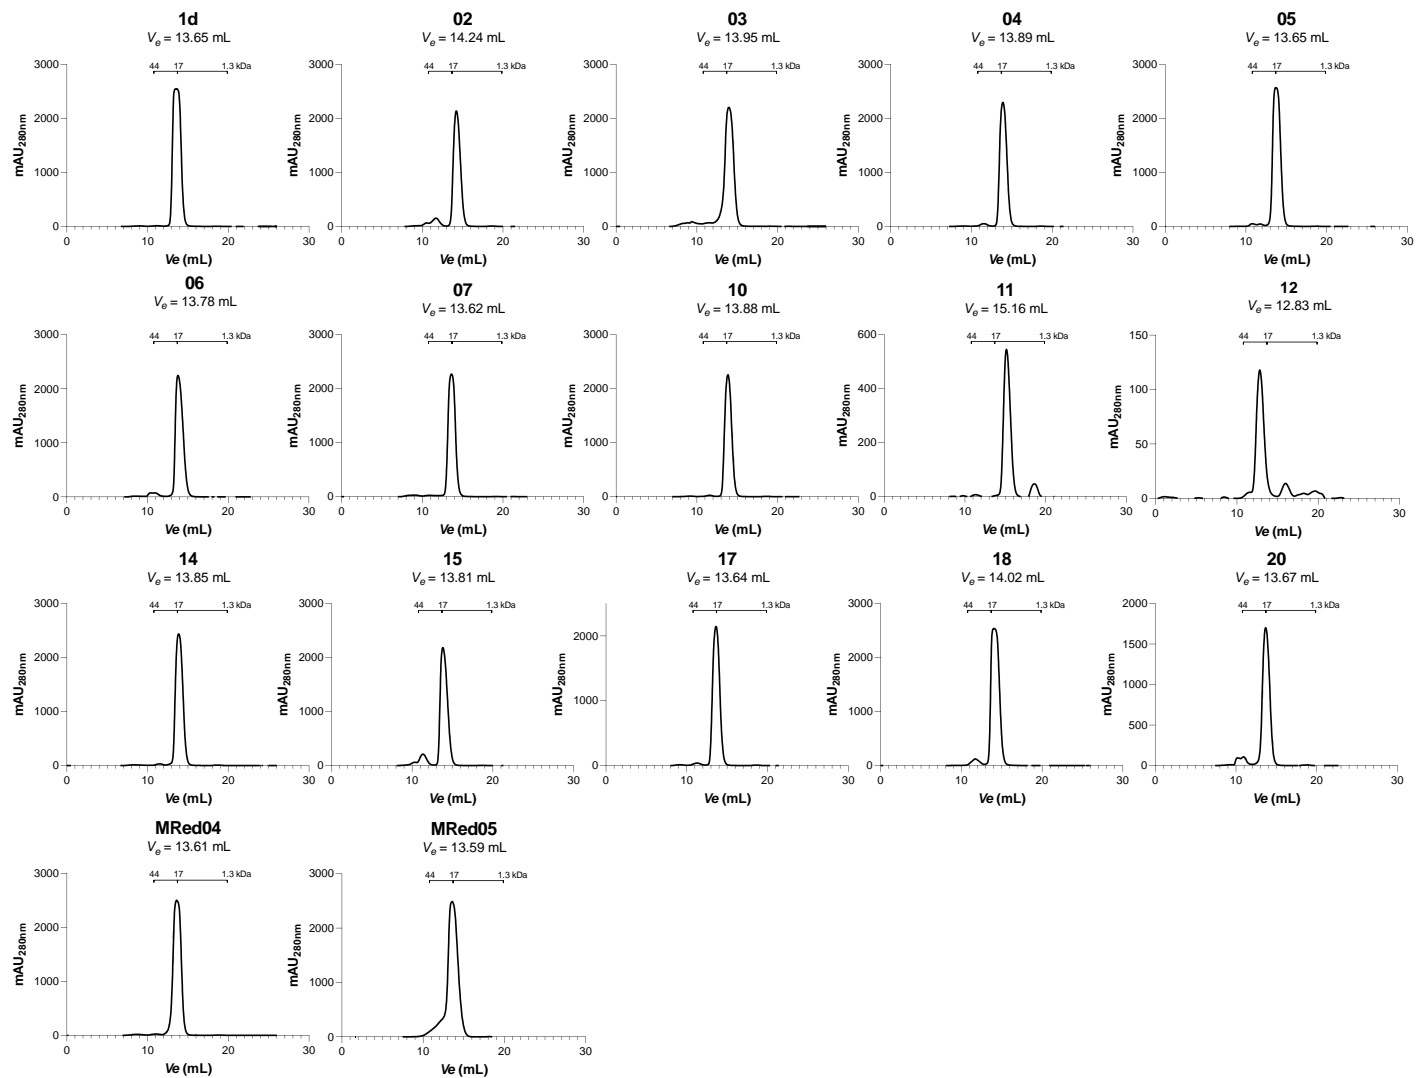

## NTD-specific V<sub>H</sub>Hs

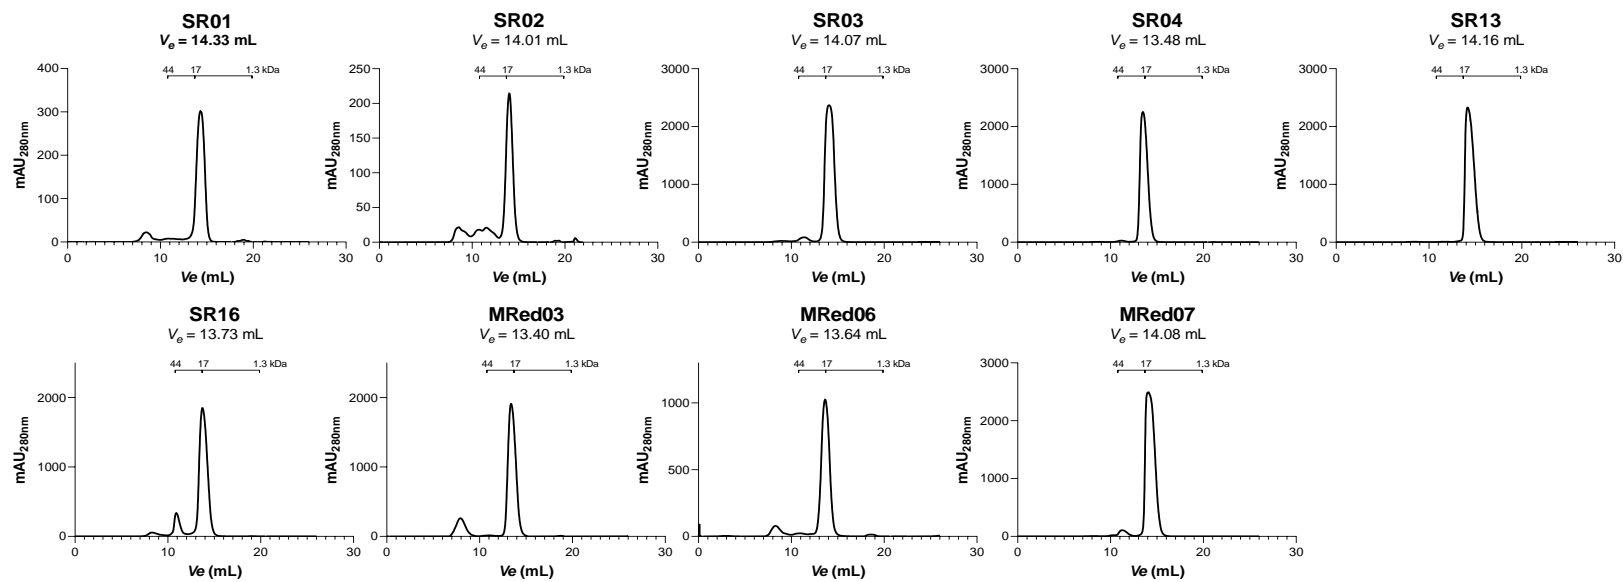

## S2-specific V<sub>H</sub>Hs

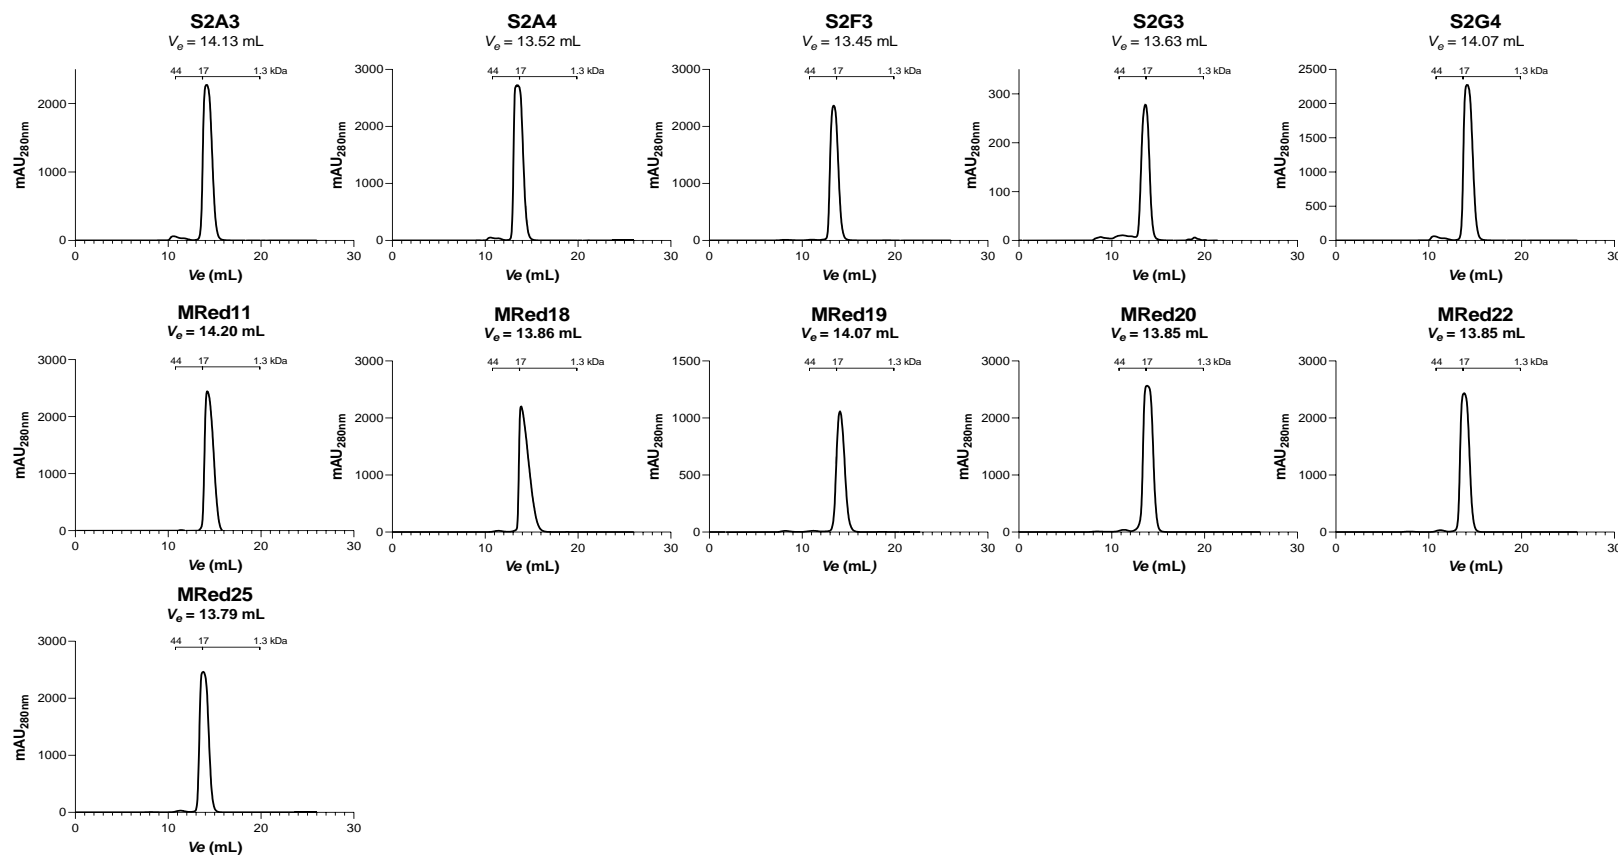

**Supplementary Figure 8. Aggregation propensity of SARS-CoV-2 V<sub>H</sub>Hs.** SEC profiles of SARS-CoV-2 V<sub>H</sub>Hs demonstrated the V<sub>H</sub>Hs were aggregation free and had elution volumes (V<sub>e</sub>s) consistent with their monomeric states. The V<sub>e</sub> positions of molecular mass standards (44 kDa, 17 kDa, 1.3 kDa) are shown. SEC was performed using a Superdex™ 75 Increase column. mAU, milliabsorbance unit.

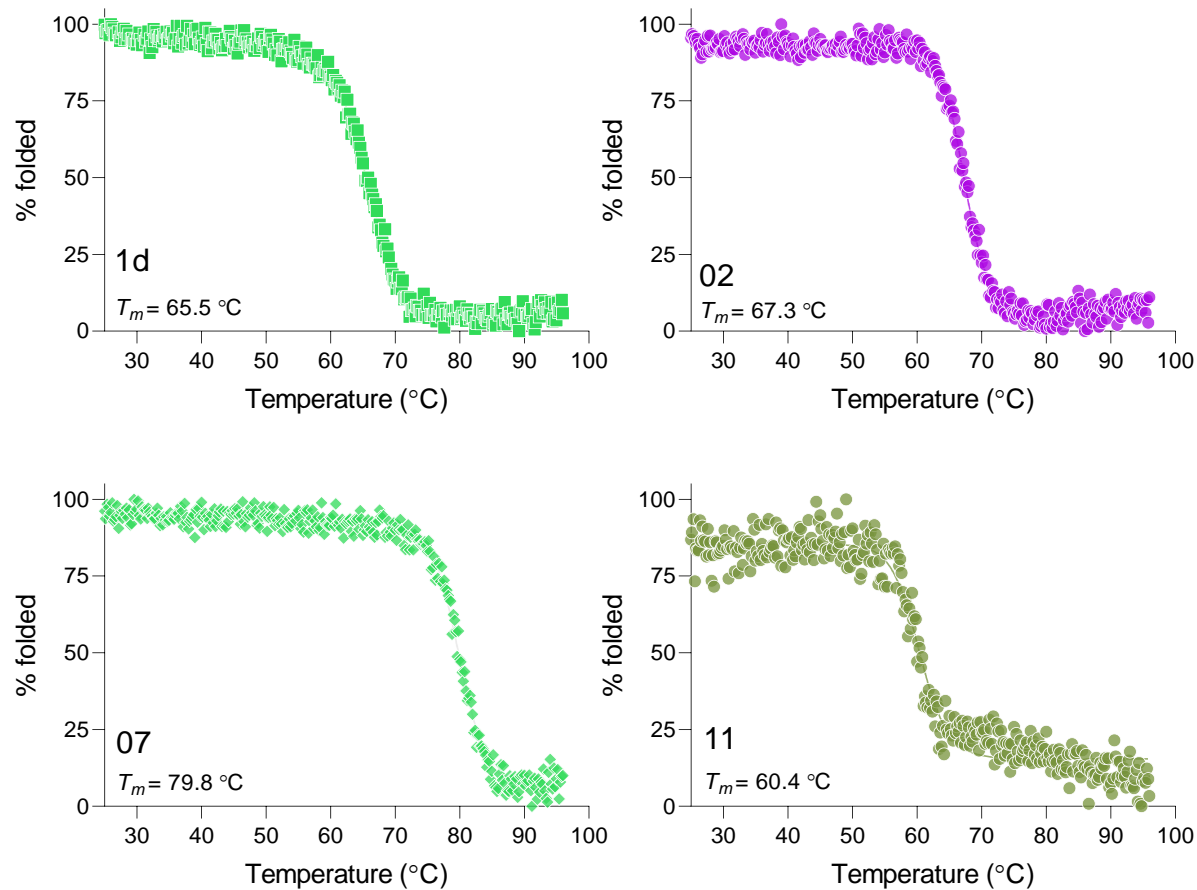

**Supplementary Figure 9. Temperature-induced unfolding profiles of SARS-CoV-2 V<sub>H</sub>Hs.** Representative examples showing the thermal unfolding of 1d, 02, 07 and 11 determined using circular dichroism (CD) spectroscopy. V<sub>H</sub>H thermal unfolding midpoint temperatures ( $T_m$ s), obtained from graphs of % folded vs temperature, were used to construct Fig. 3b and Supplementary Table 5.

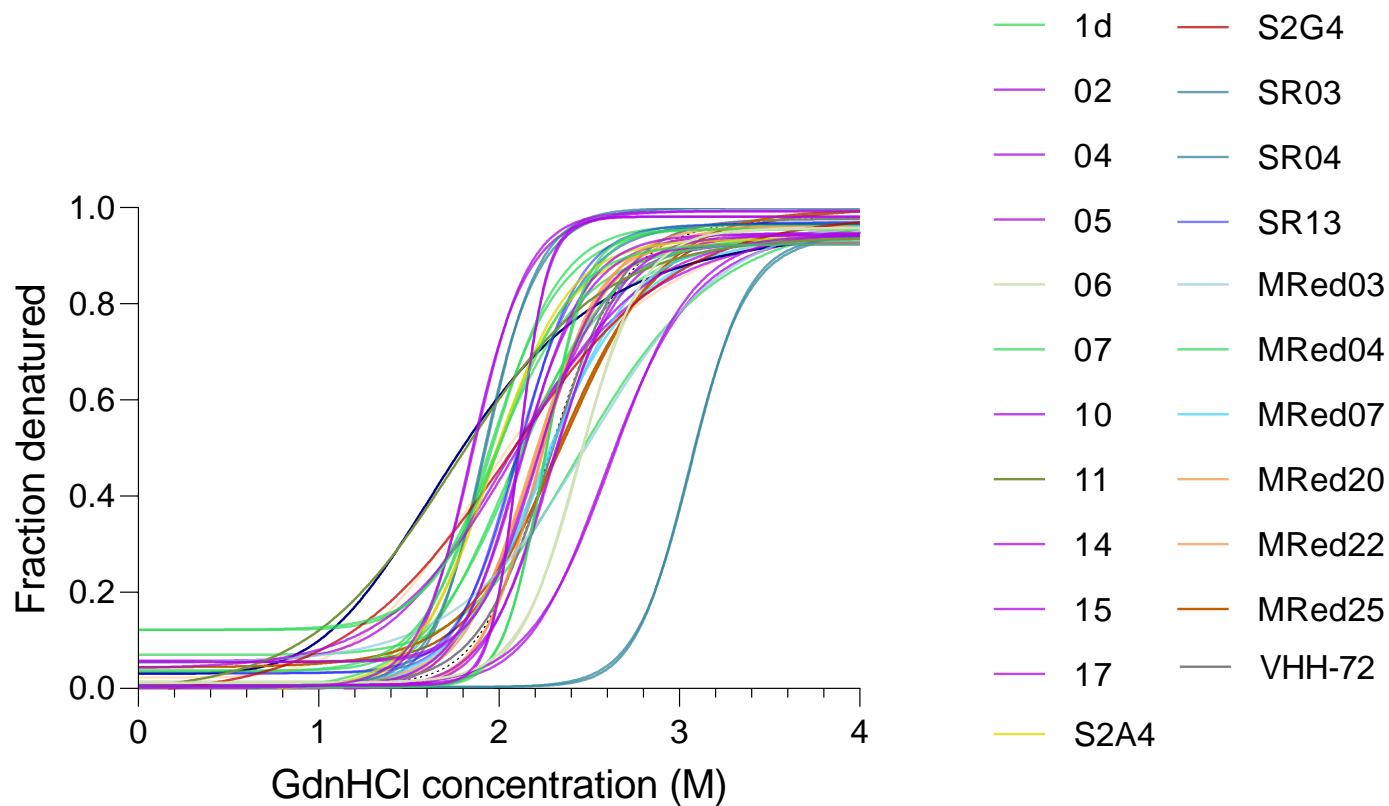

**Supplementary Figure 10. GdnHCl-induced unfolding profiles of SARS-CoV-2 V<sub>H</sub>Hs.** Unfolding of V<sub>H</sub>Hs was monitored using the automated Huncky system as described in Methods. Plots of fraction denatured vs denaturant (GdnHCl) concentration confirm the two-state transition model. The midpoints of the unfolding transition,  $C_{ms}$ , are reported in Supplementary Table 5. GdnHCl, guanidine-HCl.



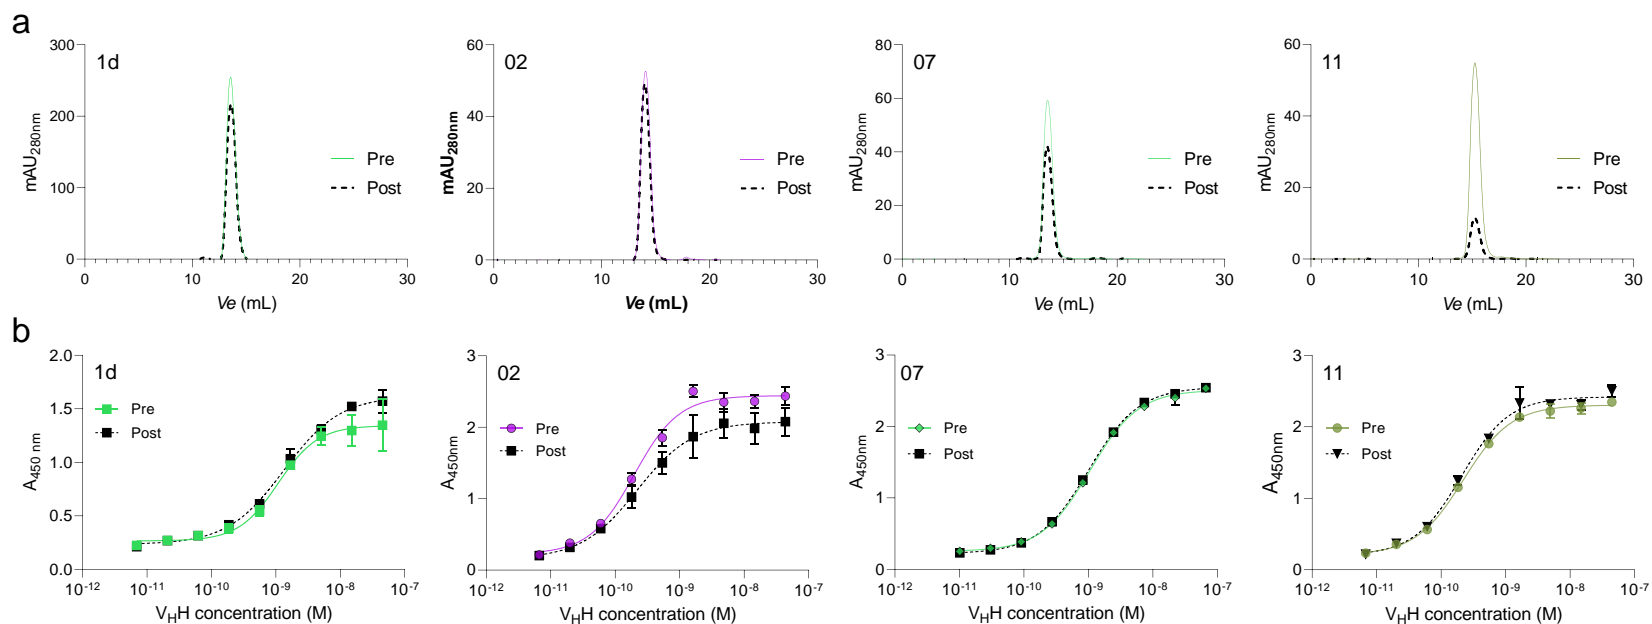

**Supplementary Figure 11. Stability of SARS-CoV-2 V<sub>H</sub>Hs against aerosolization.** **a** Assessing the effect of aerosolization on the aggregation resistance of V<sub>H</sub>Hs by comparing the SEC profiles of pre- vs post-aerosolized V<sub>H</sub>Hs. Results for representative V<sub>H</sub>Hs are shown. 1d, 02 and 07 represent the majority of V<sub>H</sub>Hs which were resistant to aerosolization-induced aggregation, showing homogenous monomeric peaks following aerosolization. V<sub>H</sub>H 11 represents one of the few V<sub>H</sub>Hs which formed visible, precipitating aggregates reflected by a significant reduction of monomeric peak area (compare monomeric peak for pre- vs post-aerosolized V<sub>H</sub>H 11). Aggregation data for a complete set of V<sub>H</sub>Hs are summarized in Supplementary Table 6, Fig. 3e (left panel) and Fig. 3e (middle panel). **b** ELISA assessing the effect of aerosolization on the functionality of V<sub>H</sub>Hs by comparing the binding activity of pre- vs post-aerosolized V<sub>H</sub>Hs against SARS-CoV-2 S. Essentially identical *EC*<sub>50</sub>s for pre- vs post-aerosolized V<sub>H</sub>Hs indicates aerosolization had no effect on the functional activity of V<sub>H</sub>Hs. *EC*<sub>50</sub>s are summarized in Fig. 3e (right panel). Pre, pre-aerosolized V<sub>H</sub>H; post, post-aerosolized V<sub>H</sub>H; mAU, milliabsorbance; *V<sub>e</sub>*, elution volumes. Error bars indicate standard deviation (SD) of two technical replicates (**b**).

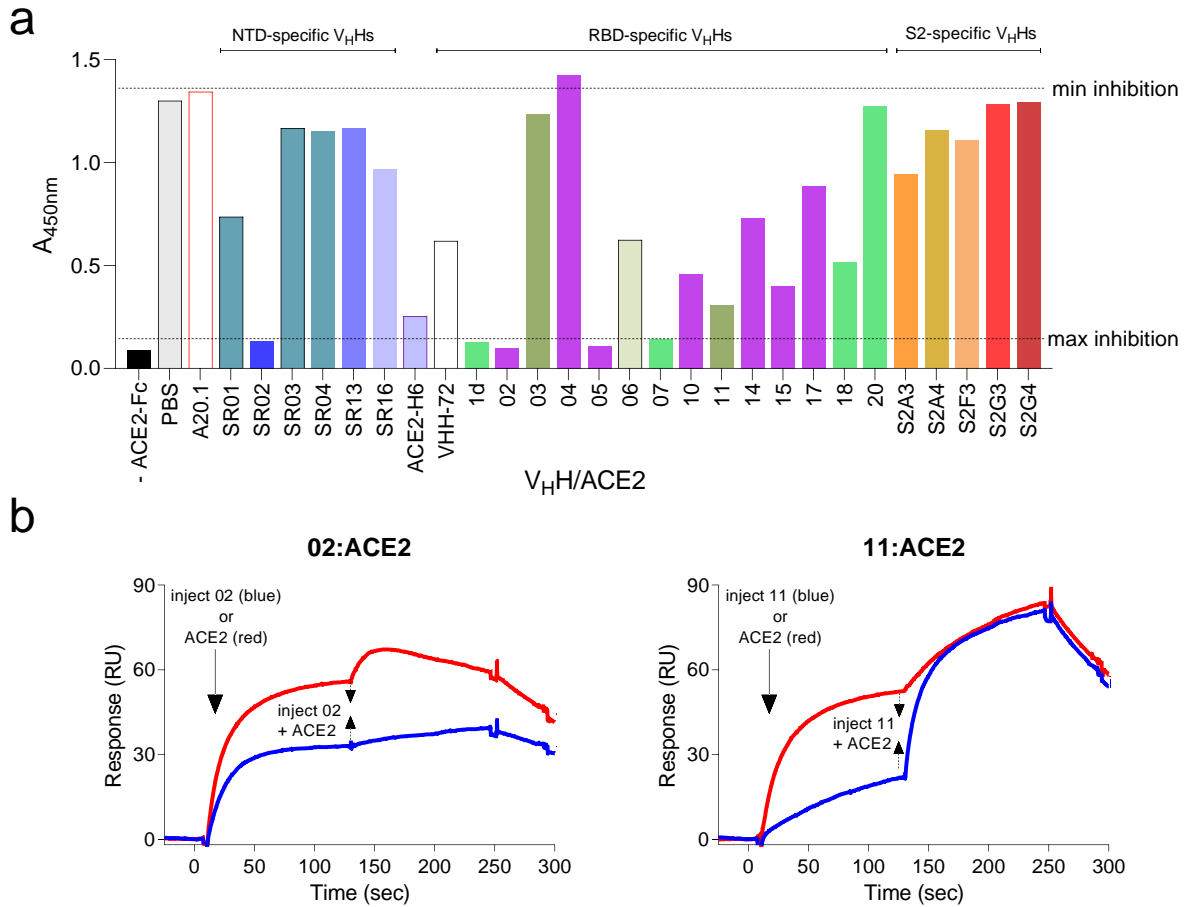

**Supplementary Figure 12. V<sub>H</sub>H SVNAs by ELISA and SPR.** **a** ELISA assessing the ability of monomeric V<sub>H</sub>Hs to block the binding of ACE2 to SARS-CoV-2 S. A dimeric, Fc-fused ACE2 (ACE2-Fc) was used in the assays at 100 ng and mixed with a fixed concentration of V<sub>H</sub>Hs (1 μM). VHH-72 V<sub>H</sub>H<sup>7</sup> and monomeric ACE2-H<sub>6</sub> served as positive and reference controls, while toxin A-specific A20.1 V<sub>H</sub>H<sup>9</sup> was a negative control. “PBS” and “A20.1” represent assays in which a SARS-CoV-2 V<sub>H</sub>H was substituted with PBS or A20.1 V<sub>H</sub>H and provide reference binding signals for lack of blocking (“min inhibition”). “-ACE2-Fc” control represent assays with ACE2-Fc omitted and provides a reference binding signal for 100% blocking (“max inhibition”). V<sub>H</sub>Hs are color-coded according to their epitope bin designation (see Fig. 1d). **b** Representative sensorgrams assessing the ability of monomeric V<sub>H</sub>Hs in blocking the binding of ACE2 receptor to its ligand SARS-CoV-2 S. SPR assays were performed in two orientations, where injection of V<sub>H</sub>H (orientation #1) or ACE2 (orientation #2) at 20 – 40× *K<sub>D</sub>* concentration (V<sub>H</sub>H) or 1 μM (ACE2) over immobilized S, was followed by injection of a mixture of V<sub>H</sub>H + ACE2 at the same V<sub>H</sub>H and ACE2 concentrations. Blue and red profiles represent binding results with the two orientations. “02:ACE2” represents a profile for a blocking V<sub>H</sub>H, where the addition of the V<sub>H</sub>H or ACE2 results in no significant increase in binding over that achieved by the injection of the ACE2 or V<sub>H</sub>H on

the antigen surface. “11:ACE2” represents a profile for non-blocking V<sub>HH</sub>s, where the addition of the V<sub>HH</sub> or ACE2 results in significant increase in binding over that achieved by the injection of the ACE2 or V<sub>HH</sub> on the antigen surface.  $\Delta$ RU<sub>s</sub>, representing binding differences between the first and second injection, were calculated from the sensorgrams and used to identify V<sub>HH</sub>s that block the binding of ACE2 receptor to its ligand RBD (see Supplementary Table 7). SARS-CoV-2 Wuhan S were used in assays. ACE2, monomeric ACE2-H<sub>6</sub>.

**a**

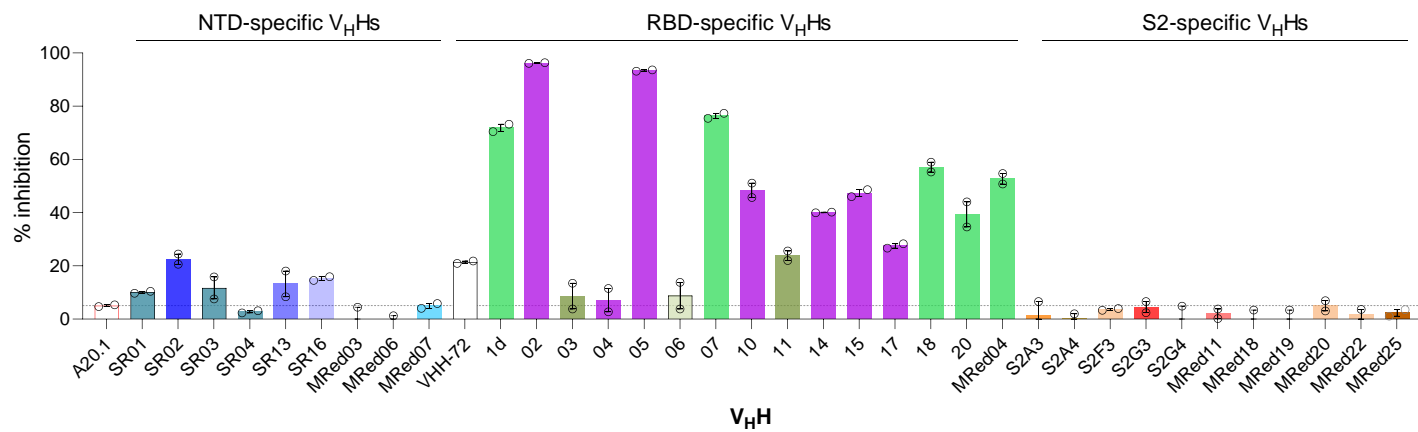

**b**

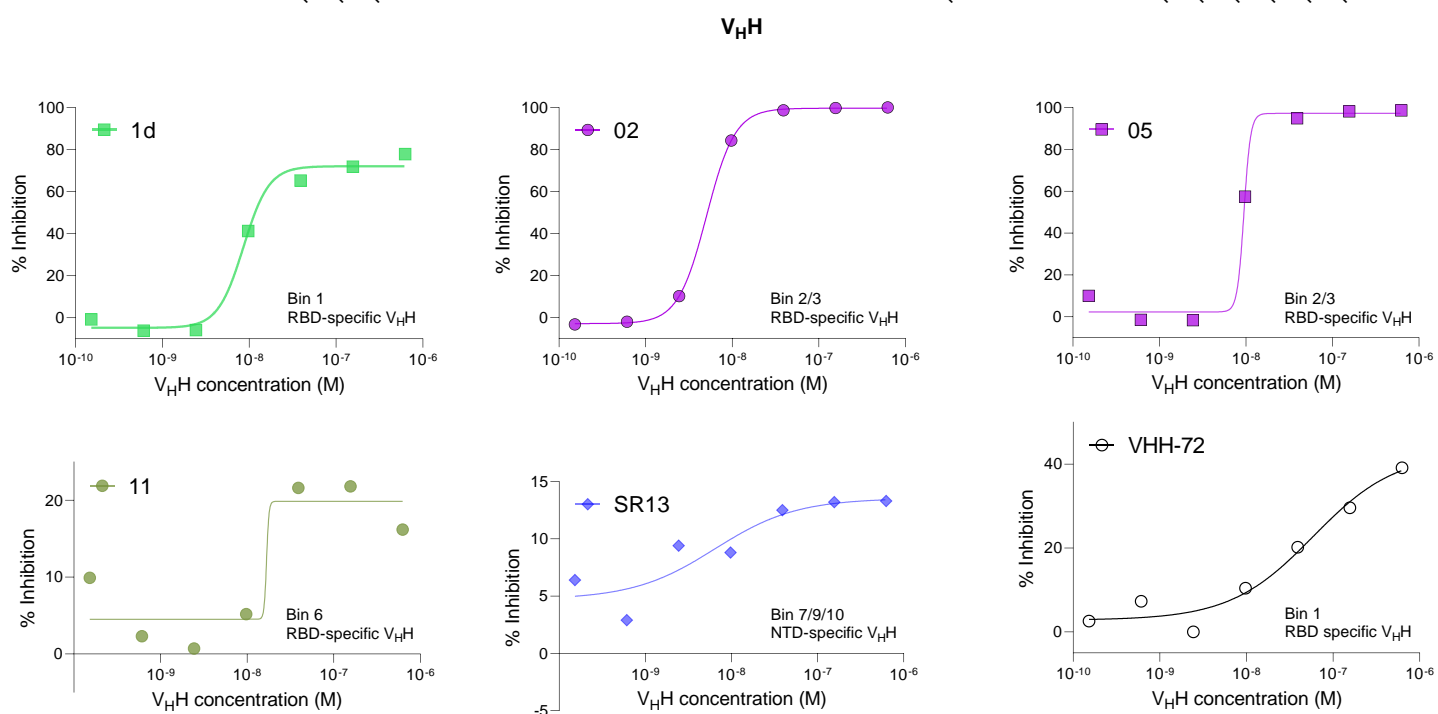

**Supplementary Figure 13. Flow cytometry SVNAs assessing the ability of monomeric SARS-CoV-2 V<sub>H</sub>Hs in blocking the binding of SARS-CoV-2 S to ACE2-expressing Vero E6 cells at 100 nM (a) or varying (b) V<sub>H</sub>H concentrations.** Representative plots are shown in **b**. V<sub>H</sub>Hs 1d, 02, 05 and 11 are RBD-specific, SR13 is NTD-specific. The complete list of *IC*<sub>50</sub>s calculated from graphs exemplified in **b** are shown in Table 2. Monomeric “ACE2” (ACE2-H<sub>6</sub>) serves as positive “antibody” control and reference; VHH-72 V<sub>H</sub>H<sup>7</sup> is included as benchmark. “A20.1” and “PBS” represent negative control assays in which V<sub>H</sub>Hs were replaced with *C. difficile* toxin A-specific A20.1 V<sub>H</sub>H<sup>9</sup> and PBS, respectively. V<sub>H</sub>Hs are color-coded according to their epitope bin designation (see Fig. 1d). Error bars indicate standard deviation (SD) of two technical replicates (**a**).

**a**

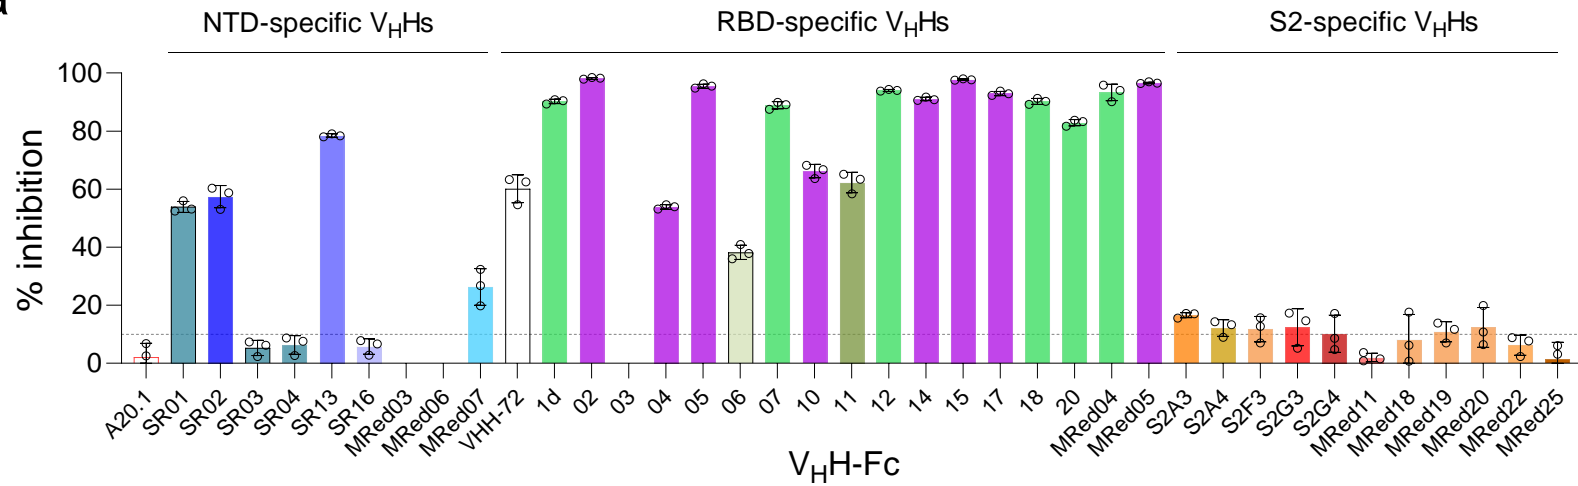

**b**

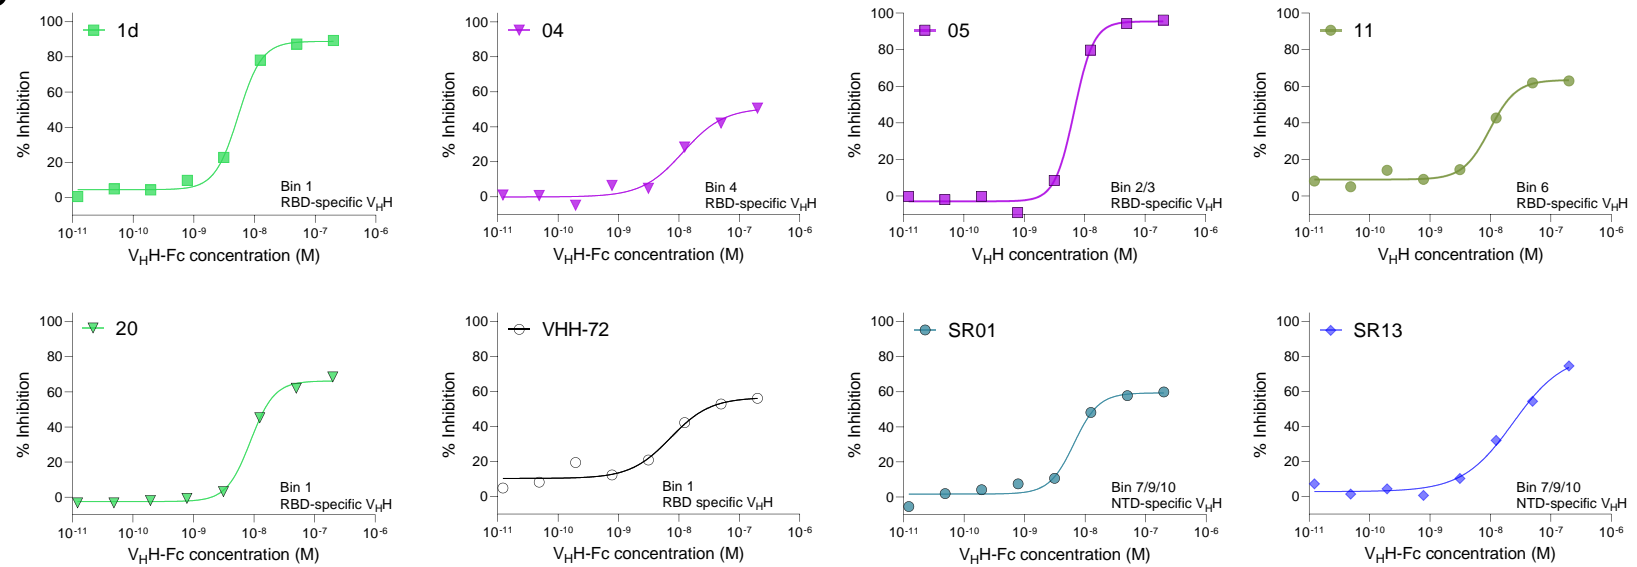

**Supplementary Figure 14. Flow cytometry SVNAs assessing the ability of bivalent SARS-CoV-2 V<sub>H</sub>H-Fcs in blocking the binding of SARS-CoV-2 S to ACE2-expressing Vero E6 cells at 250 nM (a) or varying (b) V<sub>H</sub>H-Fc concentrations.** Representative plots are shown in **b**. 1d, 02, 04, 05, 11 and 20 V<sub>H</sub>H-Fcs are RBD-specific, SR01 and SR13 are NTD-specific. The complete list of  $IC_{50}$ s calculated from graphs exemplified in **b** are reported in Table 2 and Fig. 4a. VHH-72 V<sub>H</sub>H-Fc<sup>7</sup> is included as benchmark. “A20.1” is a negative control in which V<sub>H</sub>H-Fcs were replaced with *C. difficile* toxin A-specific A20.1 V<sub>H</sub>H-Fc<sup>9</sup>. Biotinylated SARS-CoV-2 Wuhan S was used in assays. V<sub>H</sub>H-Fcs are color-coded according to their epitope bin designation (see Fig. 1d). Error bars indicate standard deviation (SD) of three technical replicates (**a**).

a

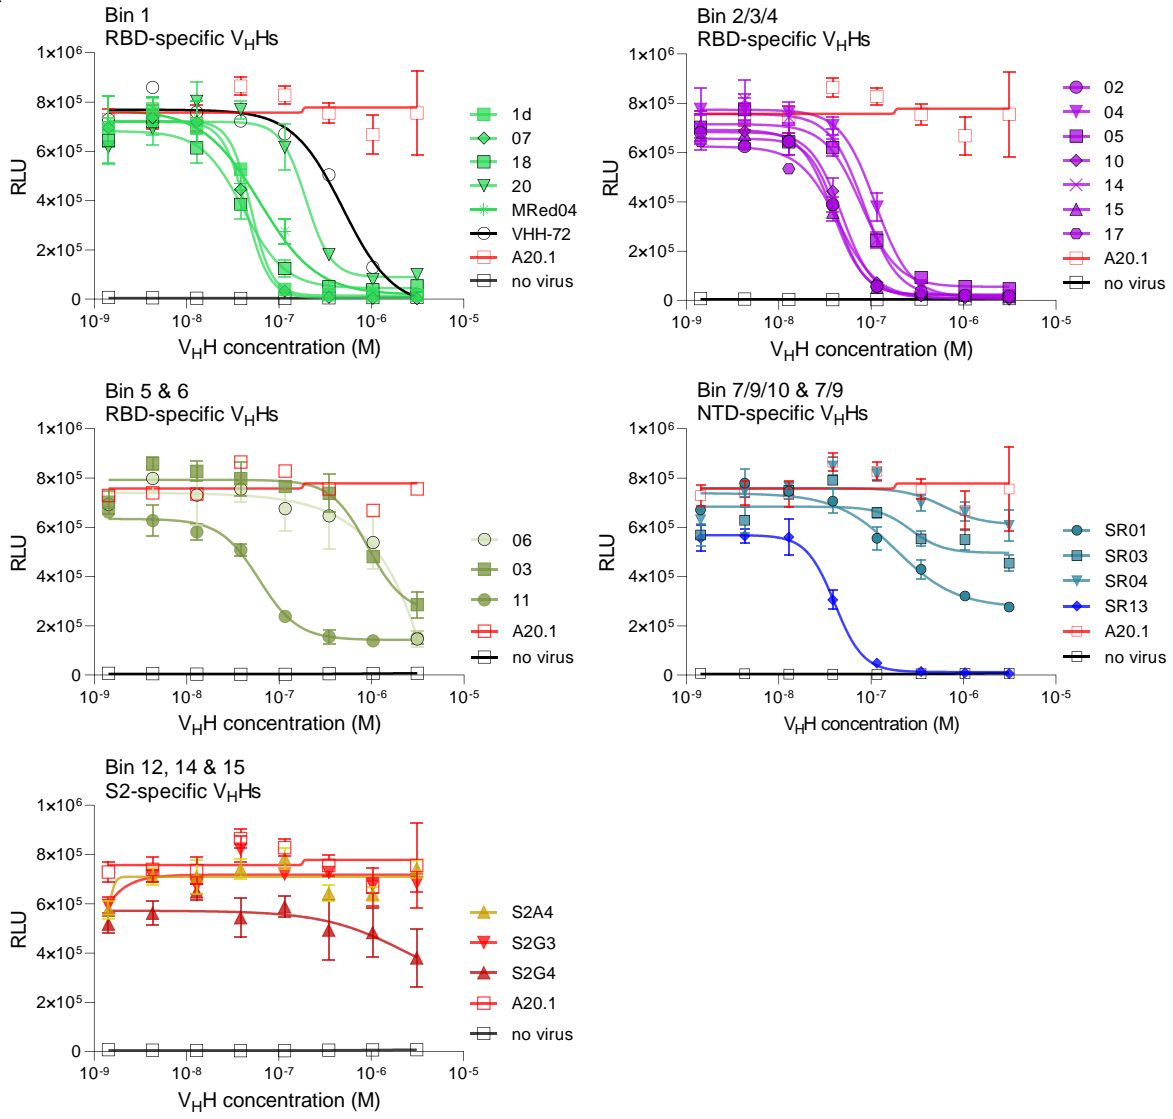



b

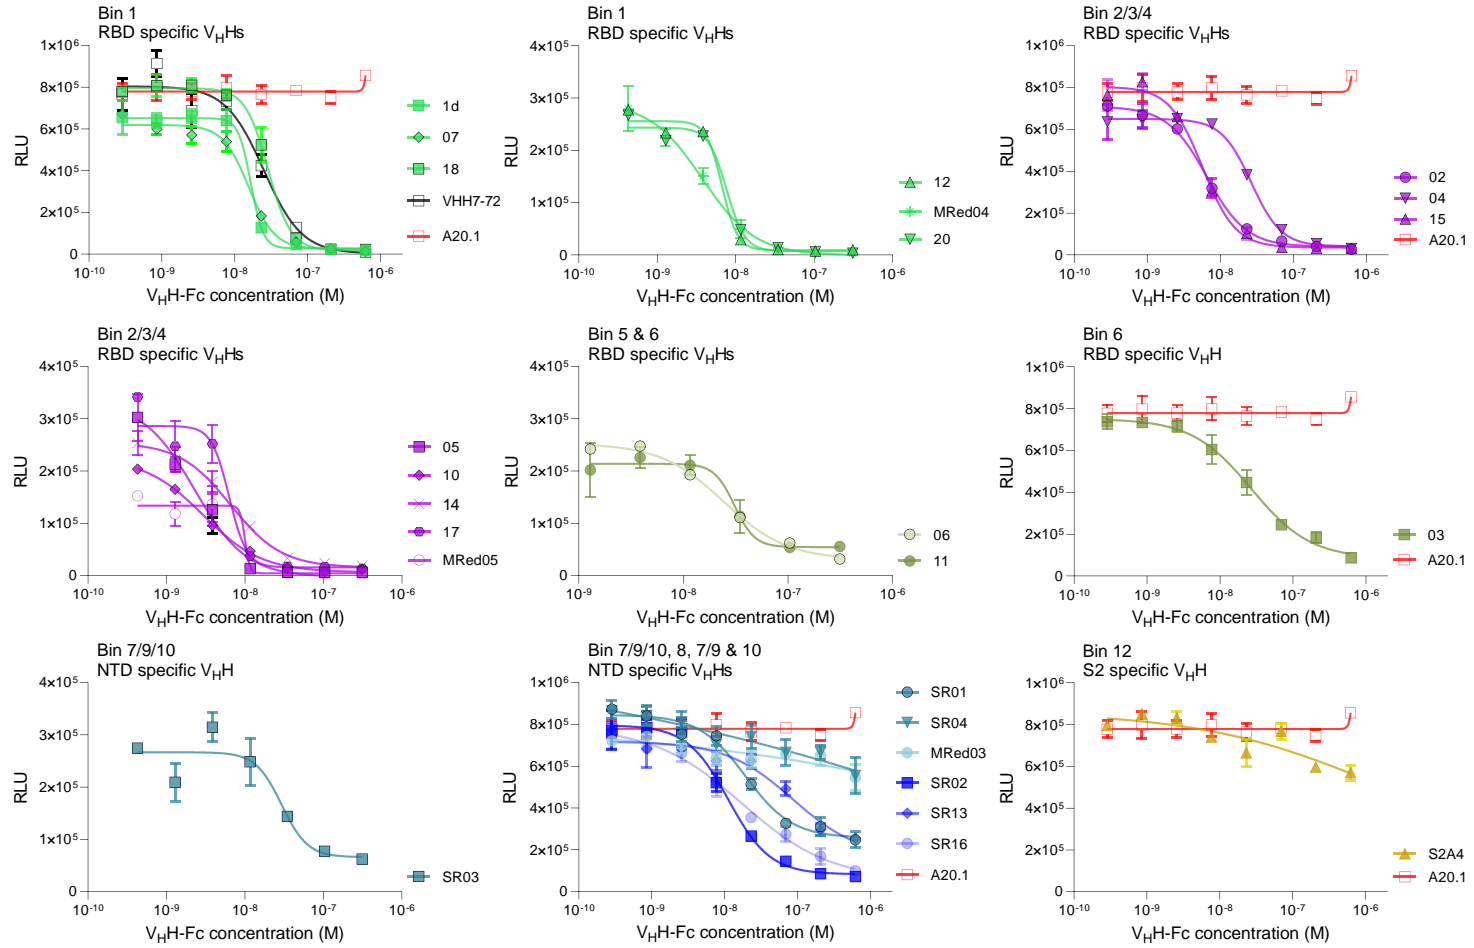

**Supplementary Figure 15. Pseudotyped virus neutralization assays (PVNAs) assessing the ability of SARS-CoV-2 V<sub>H</sub>Hs (a) and V<sub>H</sub>H-Fcs (b) in blocking the infection of ACE2-expressing HEK293T cells by SARS-CoV-2 spike-pseudotyped lentiviruses.** Results, obtained from assays performed at multiple antibody concentrations, are shown only for those V<sub>H</sub>Hs/V<sub>H</sub>H-Fcs that were positive at a threshold inhibition of 75% in preliminary inhibition screening assays. The complete list of *IC*<sub>50</sub>s calculated from graphs are recorded in Table 2 and Fig. 4a. VHH-72 V<sub>H</sub>H-Fc<sup>7</sup> is included as benchmark. “A20.1” represent negative antibody control assays in which SARS-CoV-2 V<sub>H</sub>Hs/V<sub>H</sub>H-Fcs were replaced with *C. difficile* toxin A-specific A20.1 V<sub>H</sub>H/V<sub>H</sub>H-Fc<sup>9</sup>, and provide upper limit infection RLU (relative light unit). “no virus” represent control assays in which pseudo-typed virus is omitted, and provide lower limit infection RLU. V<sub>H</sub>Hs/V<sub>H</sub>H-Fcs are color-coded according to their epitope bin designation (see Fig. 1d). Error bars indicate standard error of the mean (SEM) of three technical replicates.

a

### Live virus neutralization assay against SARS-CoV-2\_Wuhan

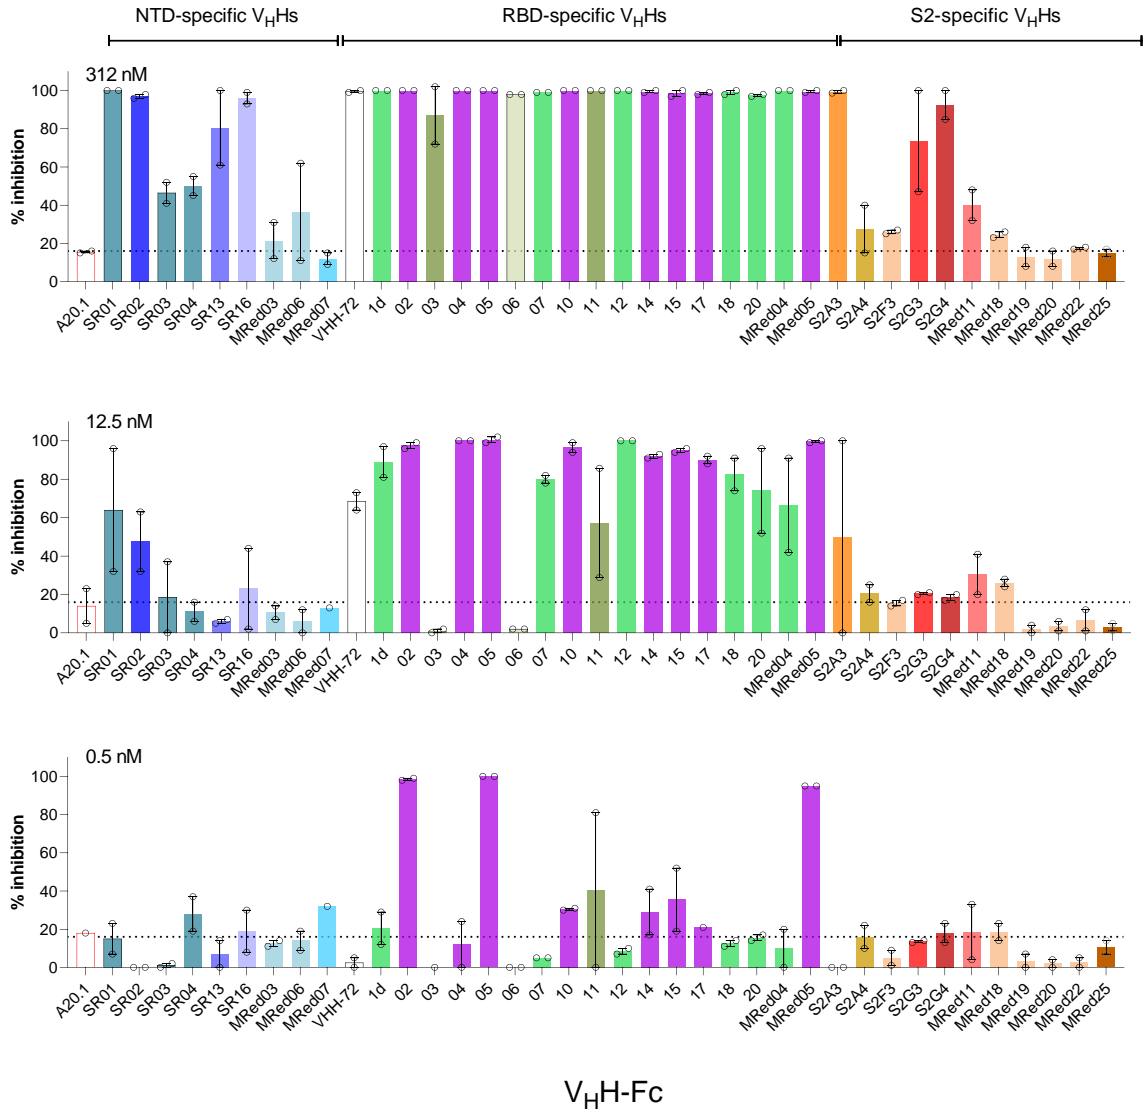

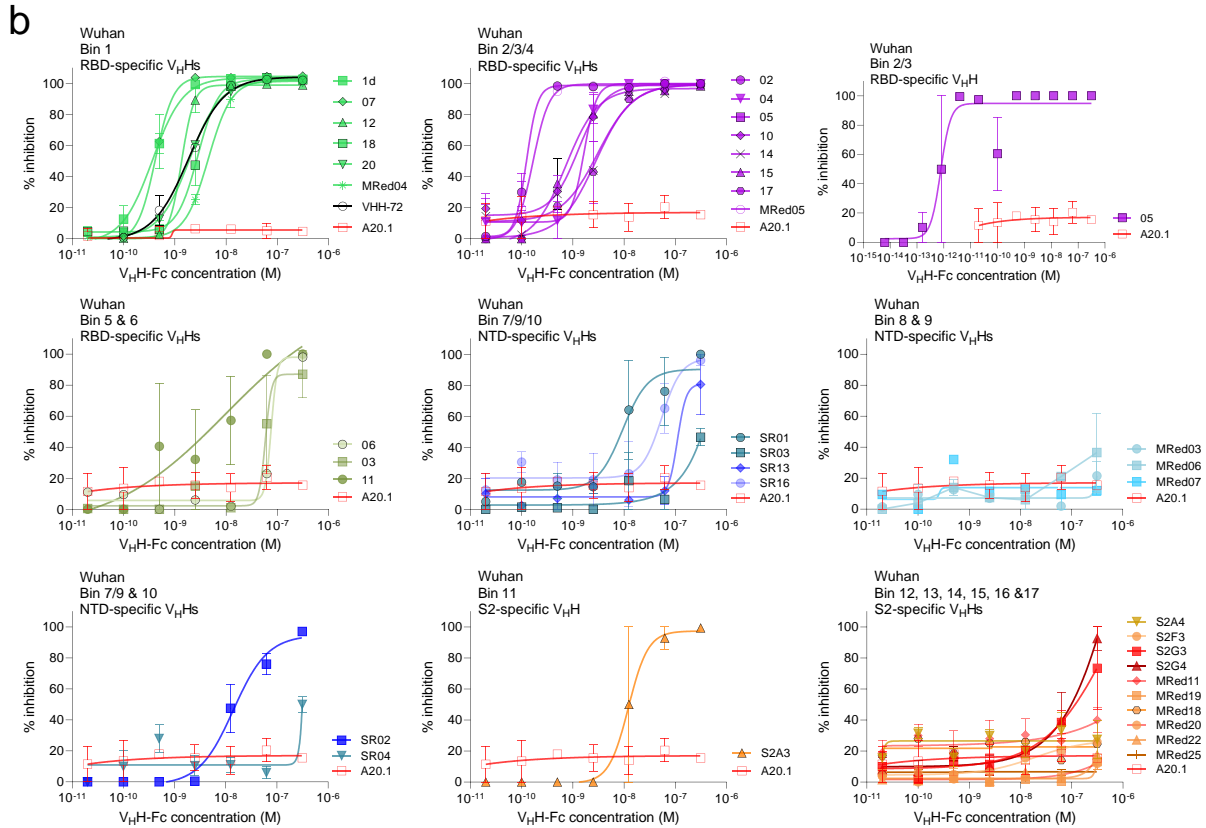

**Supplementary Figure 16. Live virus neutralization assays (LVNAs) assessing the ability of SARS-CoV-2 V<sub>HH</sub>-FcS in blocking the infection of ACE2-expressing Vero E6 cells by SARS-CoV-2 Wuhan variant at fixed (a) or varying (b) V<sub>HH</sub>-Fc concentrations.** a Inhibition assays were performed at 312, 12.5 or 0.5 nM V<sub>HH</sub>-Fc concentrations. IC<sub>50</sub>s calculated from graphs in b are reported in Table 2, Fig 4a and Fig. 4c. VHH-72<sup>7</sup> and *C. difficile* toxin A-specific V<sub>HH</sub> A20.1<sup>9</sup> are included as a benchmark and negative antibody control, respectively. V<sub>HH</sub>-FcS are color-coded according to their epitope bin designation (see Fig. 1d). Error bars indicate standard error of mean (SEM) of two technical replicates.

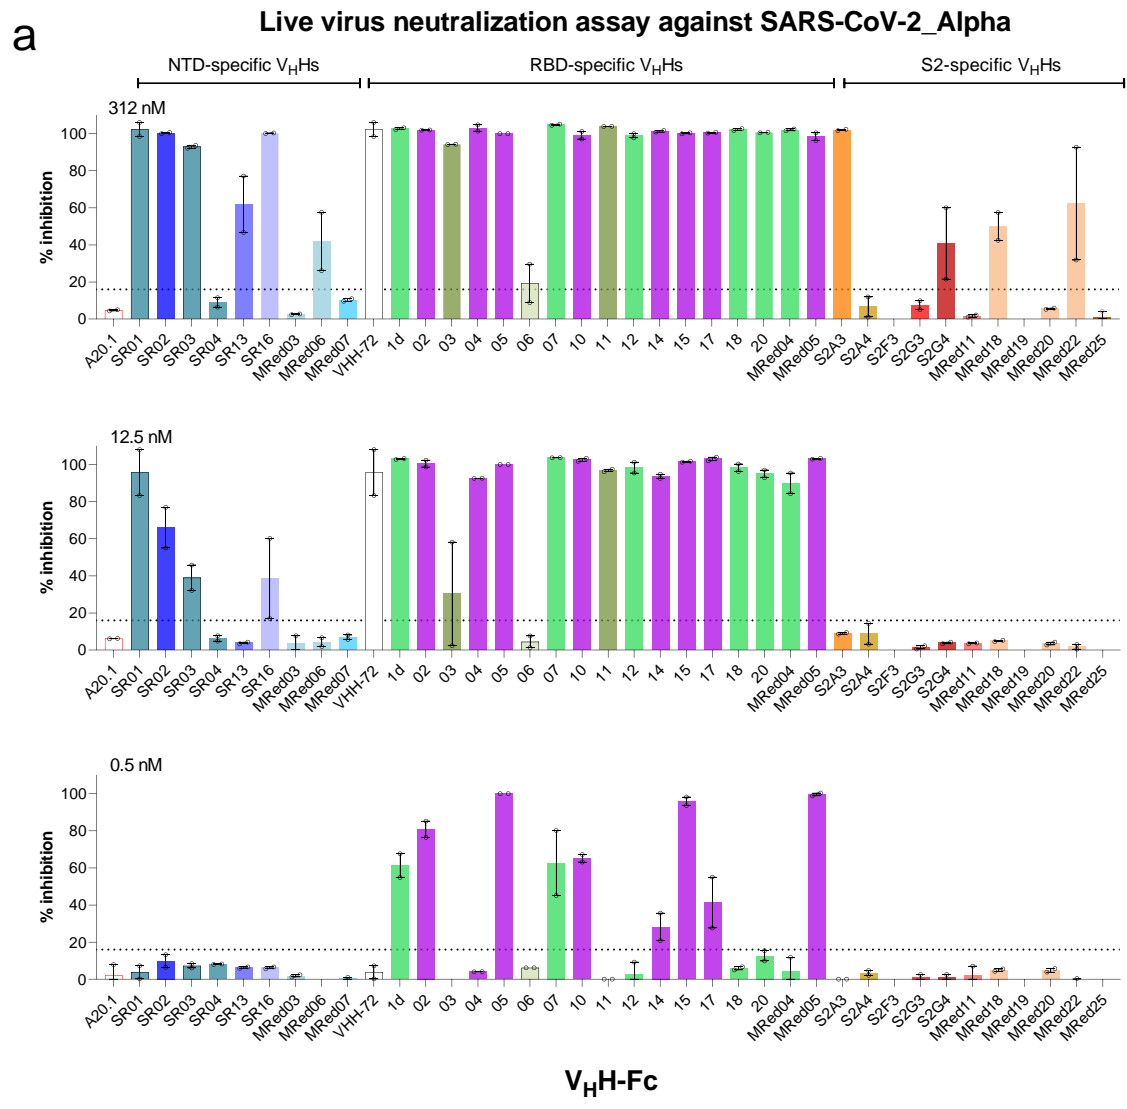

**b**

**Live virus neutralization assay against SARS-CoV-2\_Beta**

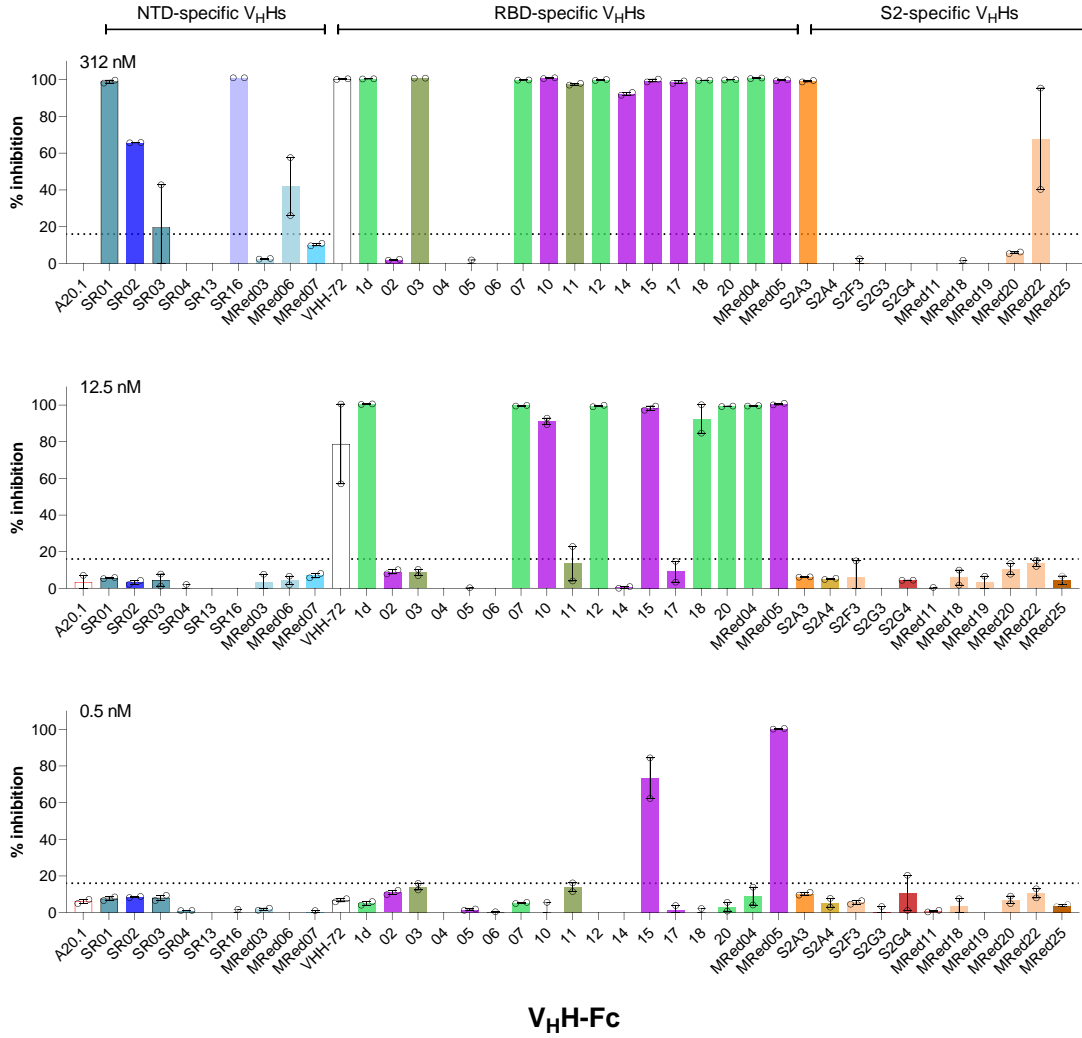

**V<sub>H</sub>H-Fc**

C

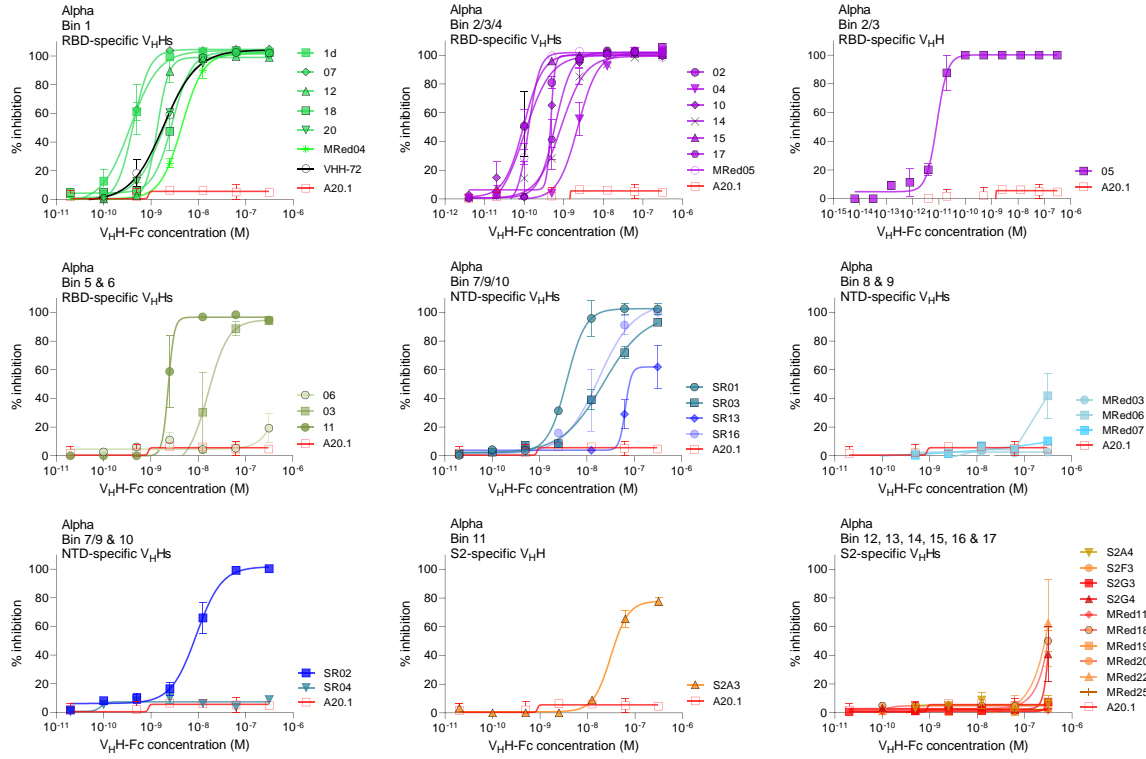

d

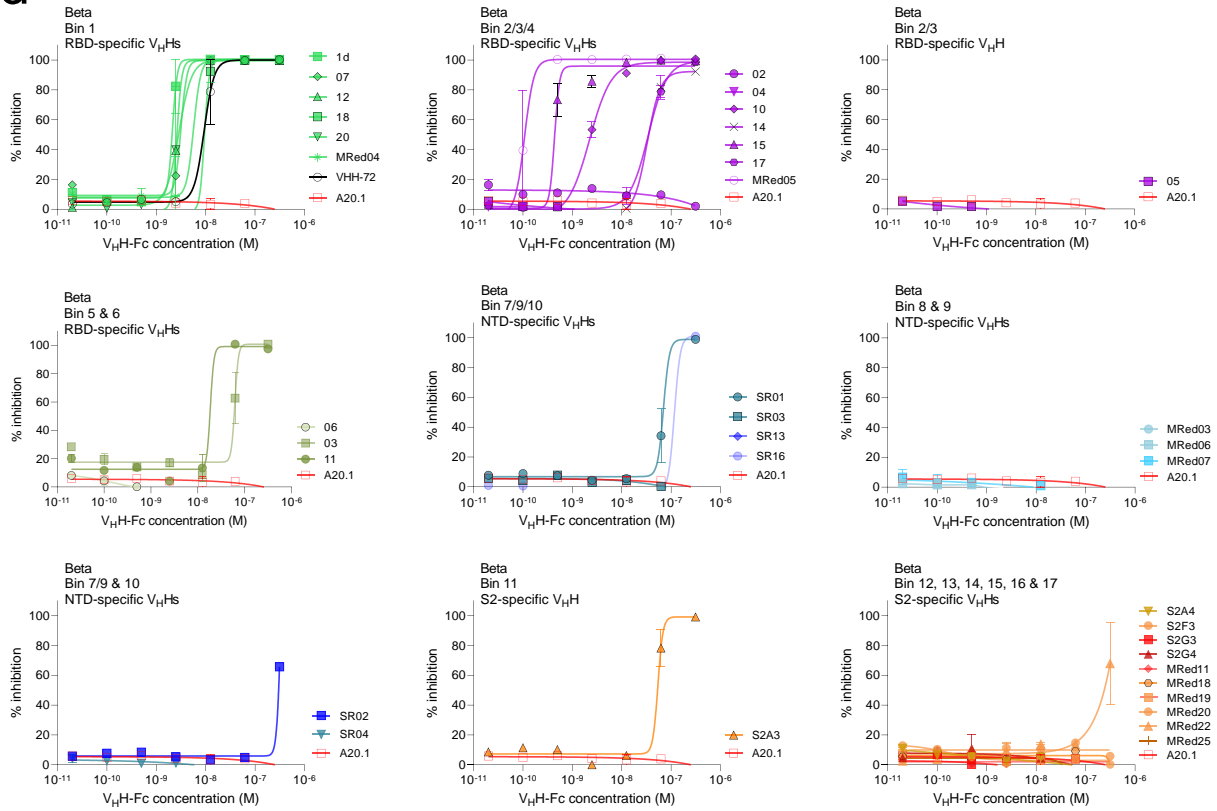

**Supplementary Figure 17. LVNAs assessing the ability of SARS-CoV-2 VHH-Fcs in blocking the infection of ACE2-expressing Vero E6 cells by SARS-CoV-2 Alpha (a and c) and Beta (b and d) variants at fixed (a and b) or varying (c and d) VHH-Fc concentrations. a & b** Inhibition assays were performed at 312, 12.5 or 0.5 nM VHH-Fc concentrations.  $IC_{50}$ s calculated from graphs in c and d are recorded in Table 2 and Fig. 4c. VHH-72<sup>7</sup> and *C. difficile* toxin A-specific VHH A20.1<sup>9</sup> are included as a benchmark and negative antibody control, respectively. VHH-Fcs are color-coded according to their epitope bin designation (see Fig. 1d). Error bars indicate standard error of mean (SEM) of two technical replicates.



a

### Live virus neutralization assay against SARS-CoV-2\_Omicron

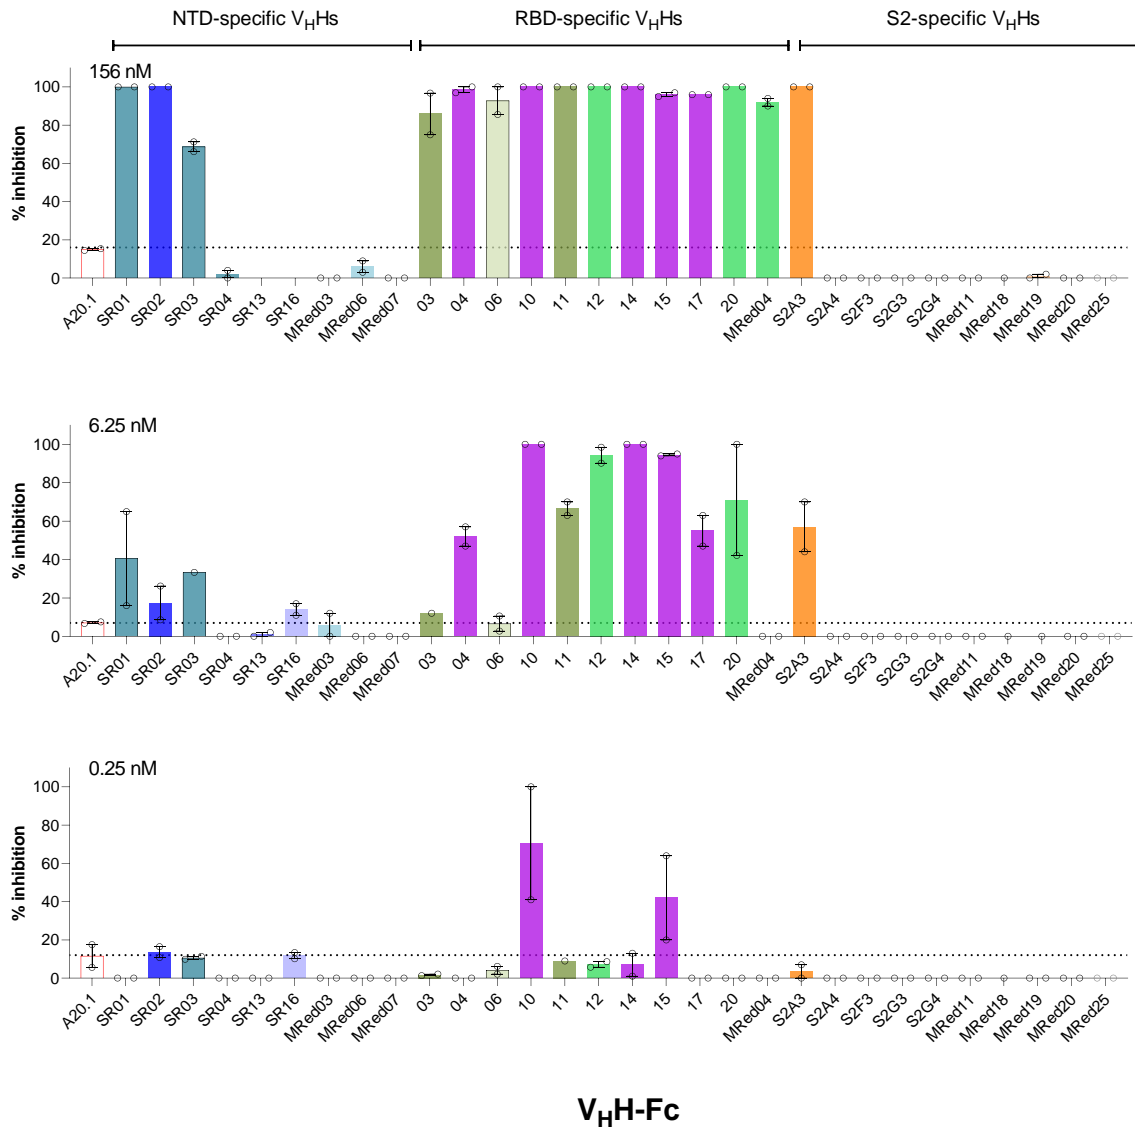

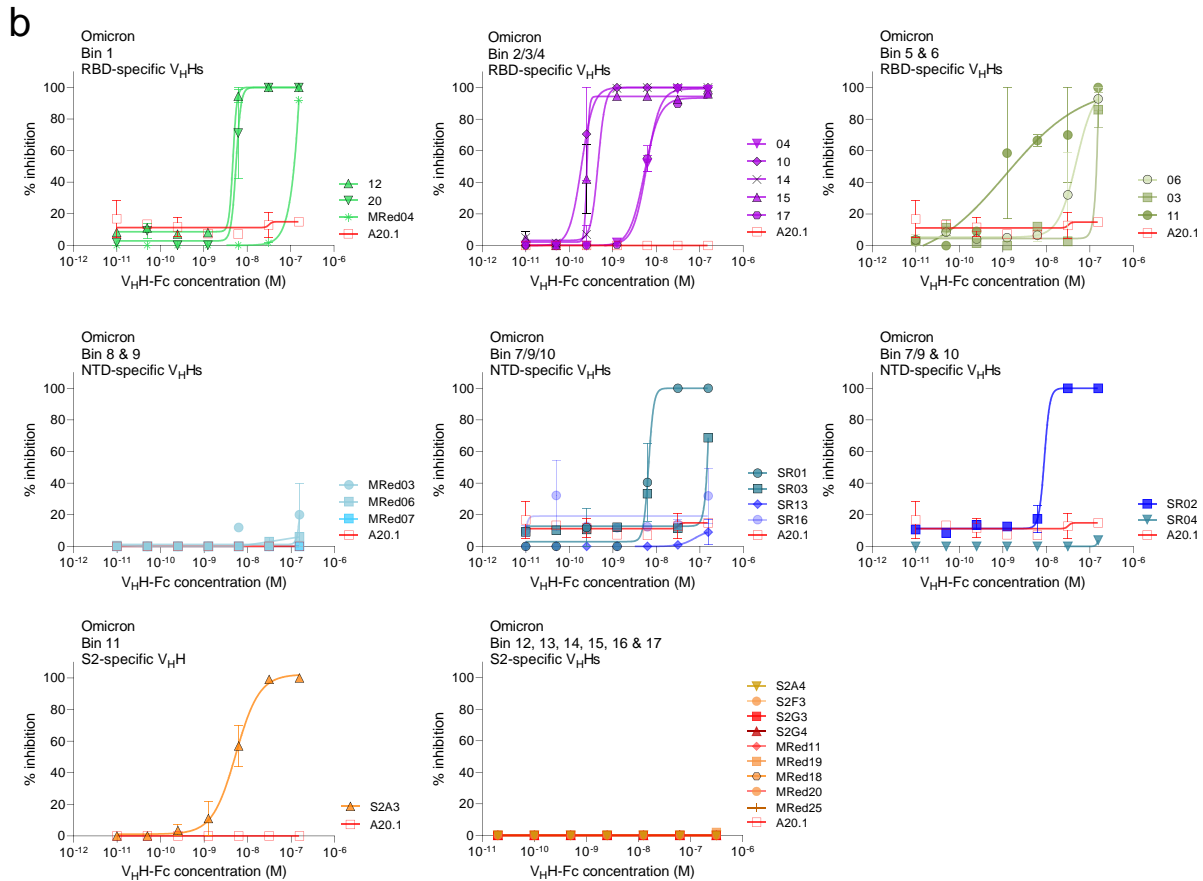

**Supplementary Figure 18. LVNAs assessing the ability of SARS-CoV-2 V<sub>H</sub>H-Fcs in blocking the infection of ACE2-expressing Vero E6 cells by SARS-CoV-2 Omicron B.1.1.529 variant at fixed (a) or varying (b) V<sub>H</sub>H-Fc concentrations.** a Inhibition assays were performed at 156, 6.25 or 0.25 nM V<sub>H</sub>H-Fc concentrations using V<sub>H</sub>H-Fcs that were positive for binding to Omicron S (Fig. 2a). IC<sub>50</sub>s calculated from graphs in b are recorded in Table 2 and Fig. 4c. *C. difficile* toxin A-specific V<sub>H</sub>H A20.1<sup>9</sup> is included as negative antibody control. V<sub>H</sub>H-Fcs are color-coded according to their epitope bin designation (see Fig. 1d). Error bars indicate standard error of mean (SEM) of two technical replicates.

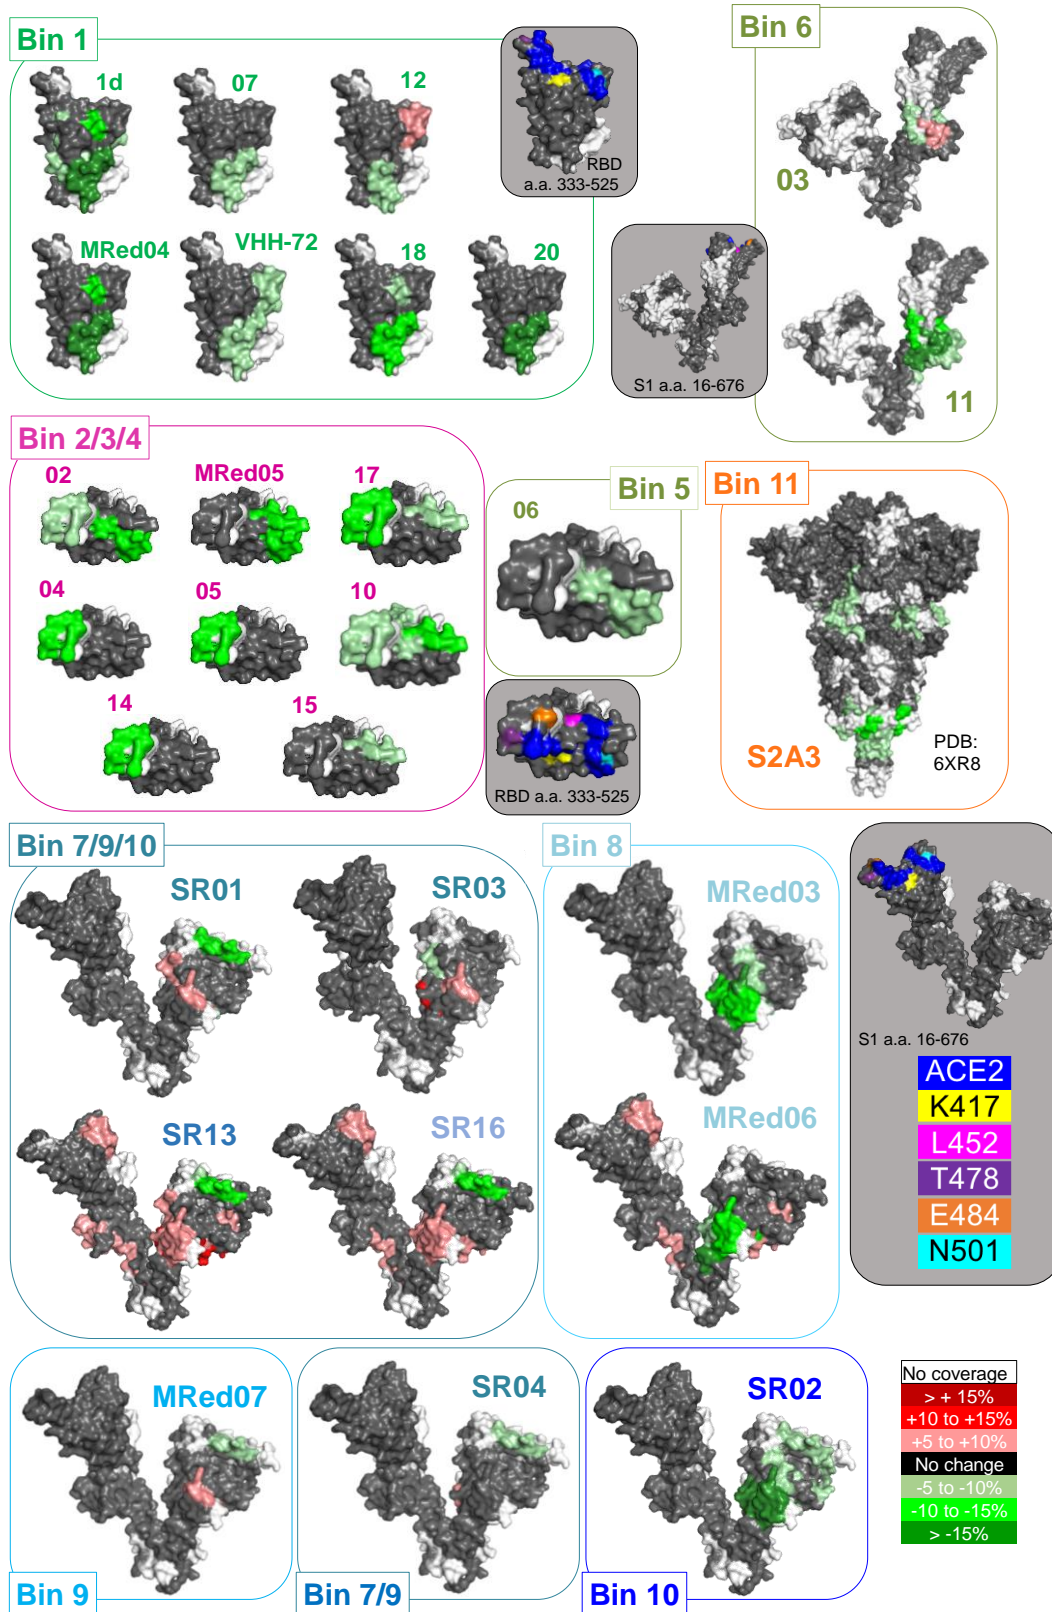

**Supplementary Figure 19. Visualization of differential HDX.**  $\Delta D$  measurements ( $D_{\text{bound}} - D_{\text{control}}$ ) projected onto three-dimensional structures (PDB 6XR8). Bins are colored based on Fig. 1d. Stabilizations are shown in green, and destabilizations in red, while regions with no significant changes in deuteration are shown in grey and missing coverage in white. Key structural features are highlighted in shaded grey boxes. Here, the ACE2 binding site is shown in blue, and five mutations from VoCs over the RBD and S1 domain are included for reference (see legend).

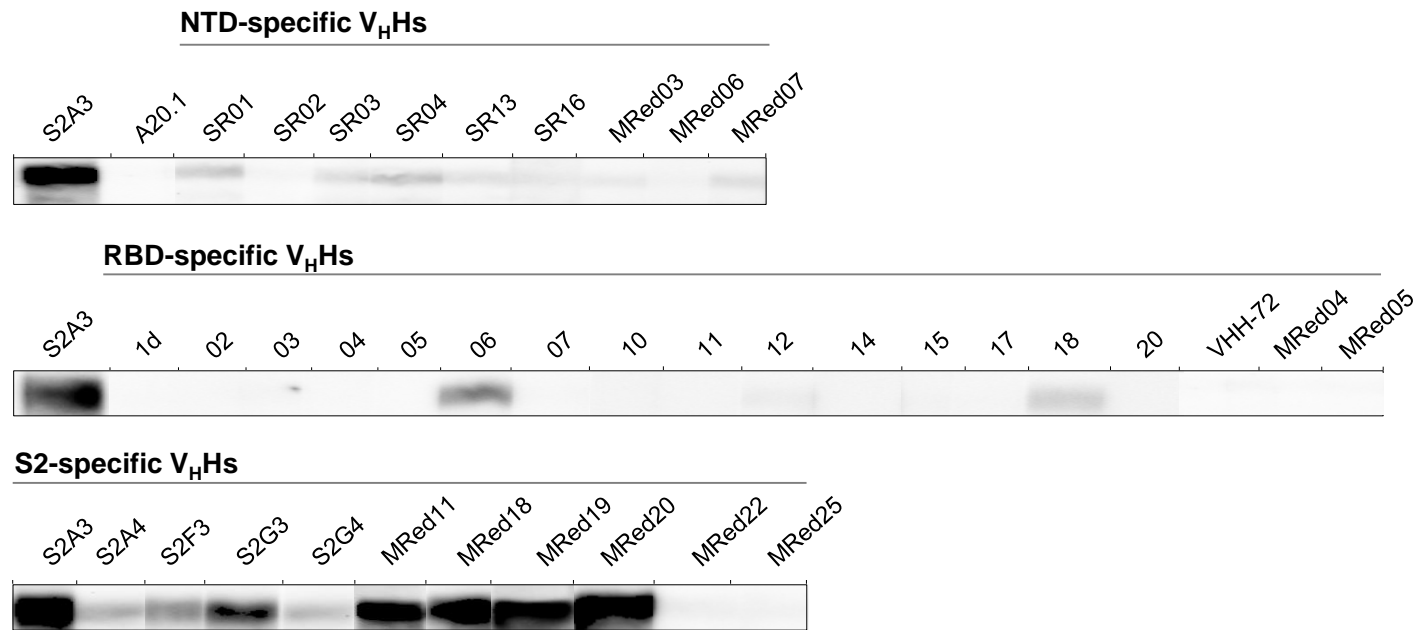

**Supplementary Figure 20. Epitope typing of SARS-CoV-2 V<sub>H</sub>Hs by SDS-PAGE/western blot against denatured S.** Presence of blots (binding signals) indicate V<sub>H</sub>H-Fcs recognizes a linear epitope. The absence of binding signals is an indirect indication of V<sub>H</sub>H-Fcs recognizing conformational epitopes. A20.1<sup>9</sup> V<sub>H</sub>H-Fc was included as isotype control. As expected, the conformational epitope-specific VHH-72<sup>7</sup> shows no binding towards denatured S. S2A3 was included in each row as reference. Epitope types are reported in Table 1.

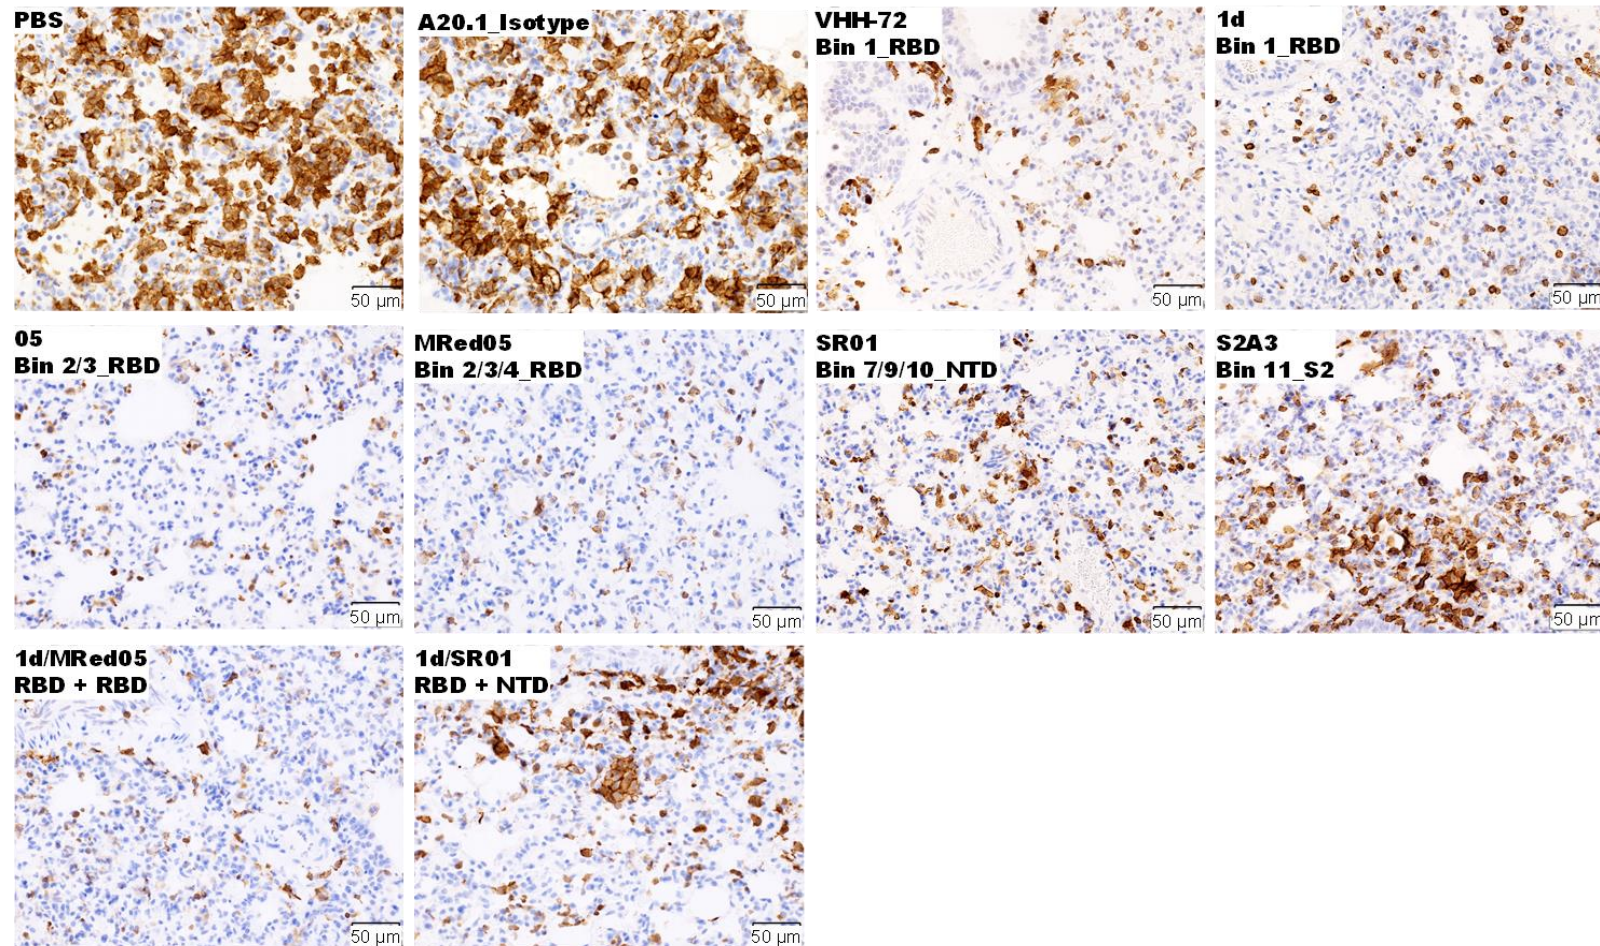

**Supplementary Figure 21. Immunohistochemical detection of infiltrating macrophages in the lungs of V<sub>H</sub>H-Fc-treated animals.** Untreated (PBS) and A20.1<sup>9</sup> isotype-treated animals showed an intense immune reaction to anti-Iba-1 antibody and an increased number of Iba-1-positive macrophages in the consolidated areas. A substantial reduction in the number of Iba-1-positive macrophages was seen in the perivascular areas and pulmonary interstitium in the lungs of V<sub>H</sub>H-Fc-treated animals. Representative images are shown from a single experiment.

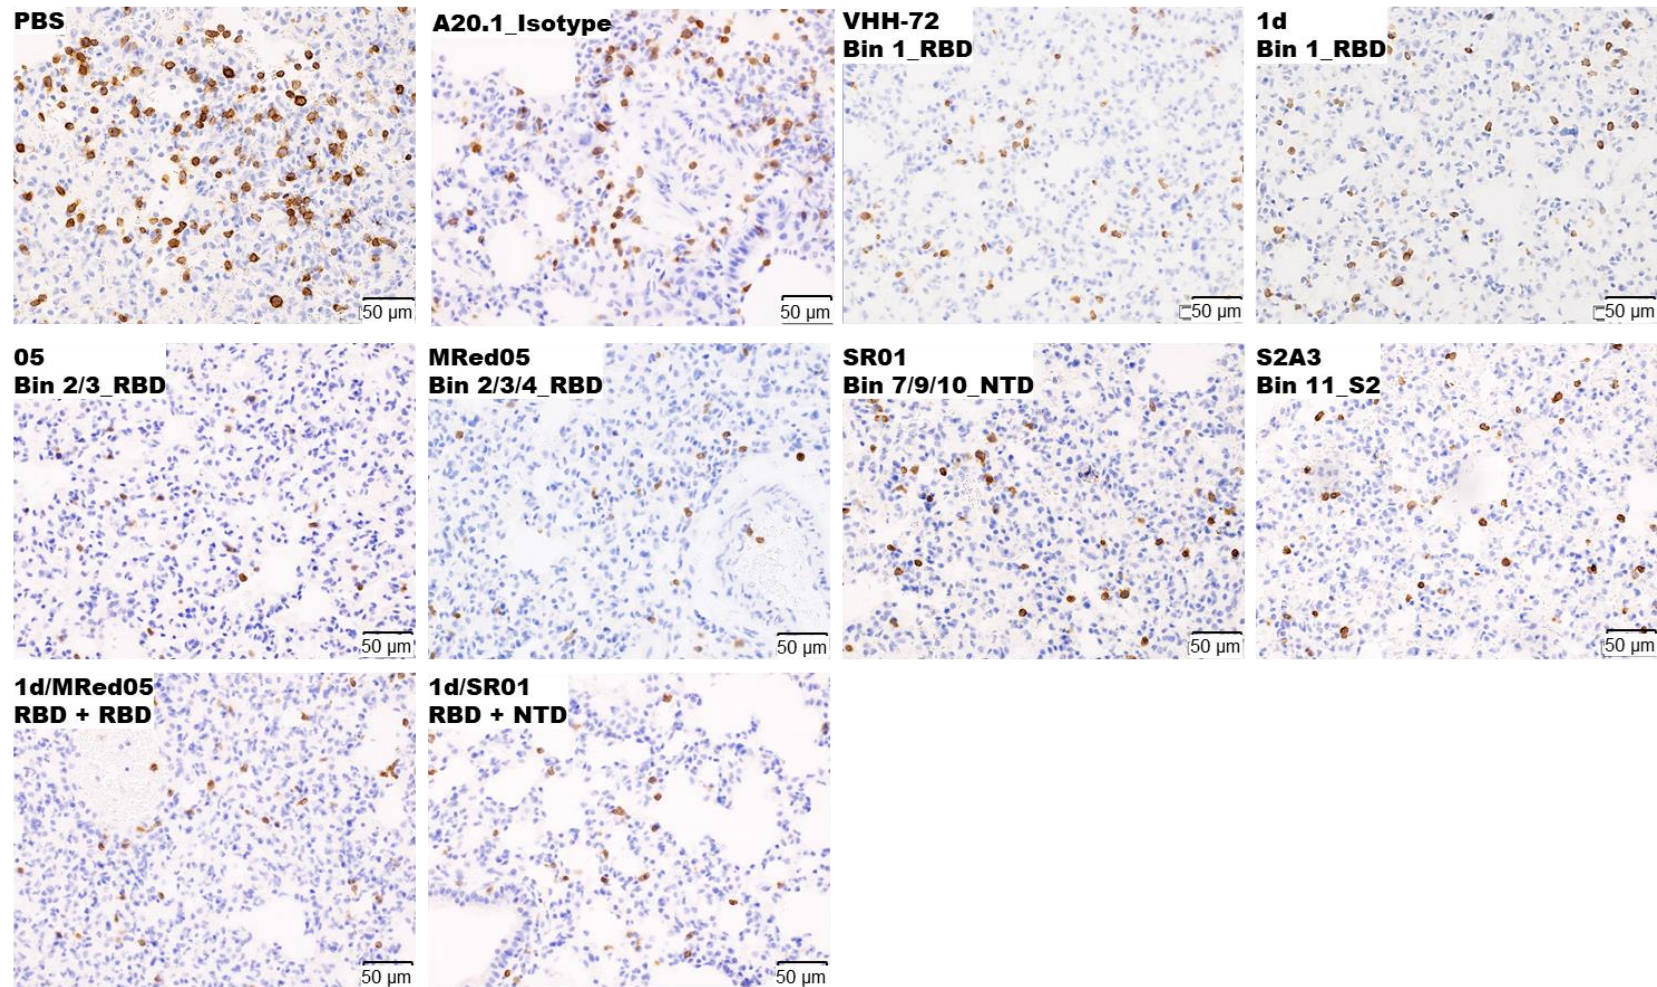

**Supplementary Figure 22. Immunohistochemical detection of T lymphocytes in the lungs of V<sub>H</sub>H-Fc-treated animals.** Untreated (PBS) and A20.1<sup>9</sup> isotype-treated animals showed an increased number of T lymphocytes in the pulmonary interstitium. A dramatic decrease in the number of T lymphocytes was seen in the lungs of V<sub>H</sub>H-Fc-treated animals. Representative images are shown from a single experiment.

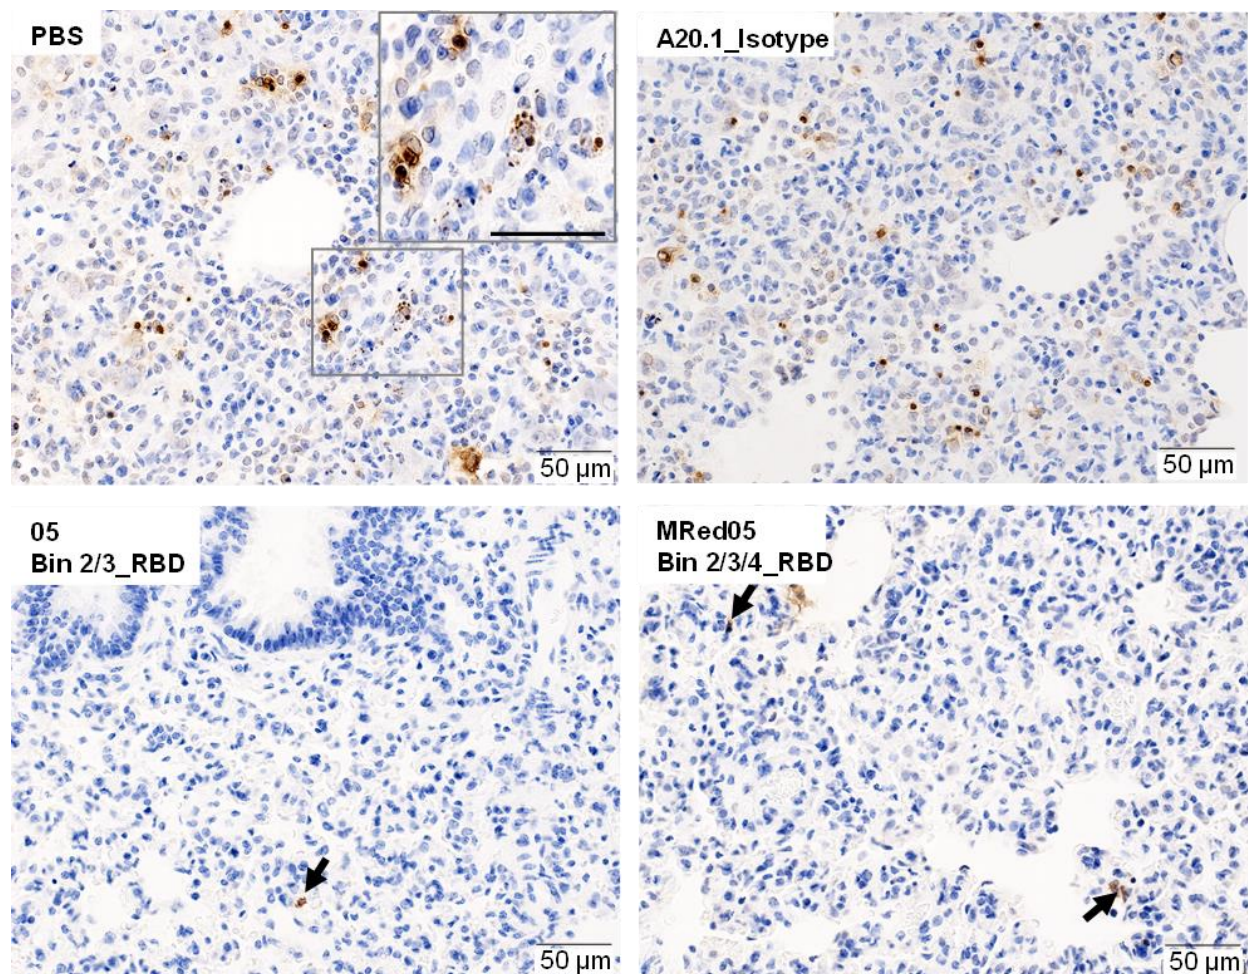

**Supplementary Figure 23. Immunohistochemical detection of apoptotic cells in the lungs of V<sub>H</sub>H-Fc treated animals.** Untreated (PBS) and A20.1<sup>9</sup> isotype-treated animals showed an increase in the number of TUNEL-positive cells with classical features of apoptotic cells in the pulmonary interstitium. The large grey frame in the corner of PBS panel shows the magnification of the region (small grey frame) in the lung parenchyma, scale bar = 50 μm. A marked reduction in the TUNEL-positive cells was seen in the lungs of 05- and MRed05-treated animals. Black arrows indicate occasional TUNEL-positive cells. Representative images are shown from a single experiment.



## Supplementary references

1. Akache B, *et al.* Immunogenic and efficacious SARS-CoV-2 vaccine based on resistin-trimerized spike antigen SmT1 and SLA archaeosome adjuvant. *Sci Rep* **11**, 21849 (2021).
2. Wrapp D, *et al.* Cryo-EM structure of the 2019-nCoV spike in the prefusion conformation. *Science* **367**, 1260-1263 (2020).
3. Colwill K, *et al.* A scalable serology solution for profiling humoral immune responses to SARS-CoV-2 infection and vaccination. *Clin & transl immunol* **11**, e1380 (2022).
4. Galipeau Y, *et al.* Relative ratios of human seasonal coronavirus antibodies predict the efficiency of cross-neutralization of SARS-CoV-2 spike binding to ACE2. *EBioMedicine* **74**, 103700 (2021).
5. Stuiblé M, *et al.* Rapid, high-yield production of full-length SARS-CoV-2 spike ectodomain by transient gene expression in CHO cells. *J Biotechnol* **326**, 21-27 (2021).
6. Sulea T, *et al.* Structure-based dual affinity optimization of a SARS-CoV-1/2 cross-reactive single-domain antibody. *PloS one* **17**, e0266250 (2022).
7. Wrapp D, *et al.* Structural basis for potent neutralization of betacoronaviruses by single-domain camelid antibodies. *Cell* **181**, 1004-1015 e1015 (2020).
8. Rossotti MA, *et al.* Camelid single-domain antibodies raised by DNA immunization are potent inhibitors of EGFR signaling. *Biochem J* **476**, 39-50 (2019).
9. Hussack G, *et al.* Neutralization of *Clostridium difficile* toxin A with single-domain antibodies targeting the cell receptor binding domain. *J Biol Chem* **286**, 8961-8976 (2011).
