# Supplementary material
Source: PubMed Central journal article supplement (PMC9463176)
Supplement: 42003_2022_3866_MOESM2_ESM.pdf [file 42003_2022_3866_MOESM2_ESM.pdf]

## Description of Additional Supplementary Files

**File name:** Supplementary Data 1

**Description:** The source data behind the main figures in the paper.
